# Supplementary material
Source: MDPI journal article supplement (https://www.mdpi.com/2073-8994/13/10/1885)
Supplement: s1 [file s1]

# *Supplementary Materials*

*for*

## *Unsymmetrical Hexafluorocyclopentene-linked Twist $\pi$ -Conjugated Molecules as Dual-State Emissive Luminophores*

Shigeyuki Yamada,<sup>\*,1</sup> Akito Nishizawa,<sup>1</sup> Kazuki Kobayashi,<sup>1</sup> Keigo Yoshida,<sup>1</sup> Masato Morita,<sup>1</sup>  
Tomohiro Agou,<sup>2</sup> Takaaki Hosoya,<sup>2</sup> Hiroki Fukumoto,<sup>2</sup> and Tsutomu Konno<sup>1</sup>

<sup>1</sup> Faculty of Molecular Chemistry and Engineering, Kyoto Institute of Technology, Matsugasaki, Sakyo-ku, Kyoto 606-8585, Japan

<sup>2</sup> Department of Quantum Beam Science, Graduate School of Science and Engineering, Ibaraki University, 4-12-1 Naka-narusawa, Hitachi, Ibaraki 316-8511, Japan

\* Correspondence: [syamada@kit.ac.jp](mailto:syamada@kit.ac.jp); Tel: +81-75-724-7517

### *Table of Contents*

|                           |       |             |
|---------------------------|-------|-------------|
| 1. Synthesis              | ..... | S-2 ~ S-5   |
| 2. NMR spectra            | ..... | S-6 ~ S-19  |
| 3. DFT calculation        | ..... | S-20 ~ S-26 |
| Cartesian coordinate      | ..... | S-27 ~ S-38 |
| 4. Crystal structure      | ..... | S-39        |
| 5. Photophysical behavior | ..... | S-40 ~ S-44 |

## 1. Synthesis

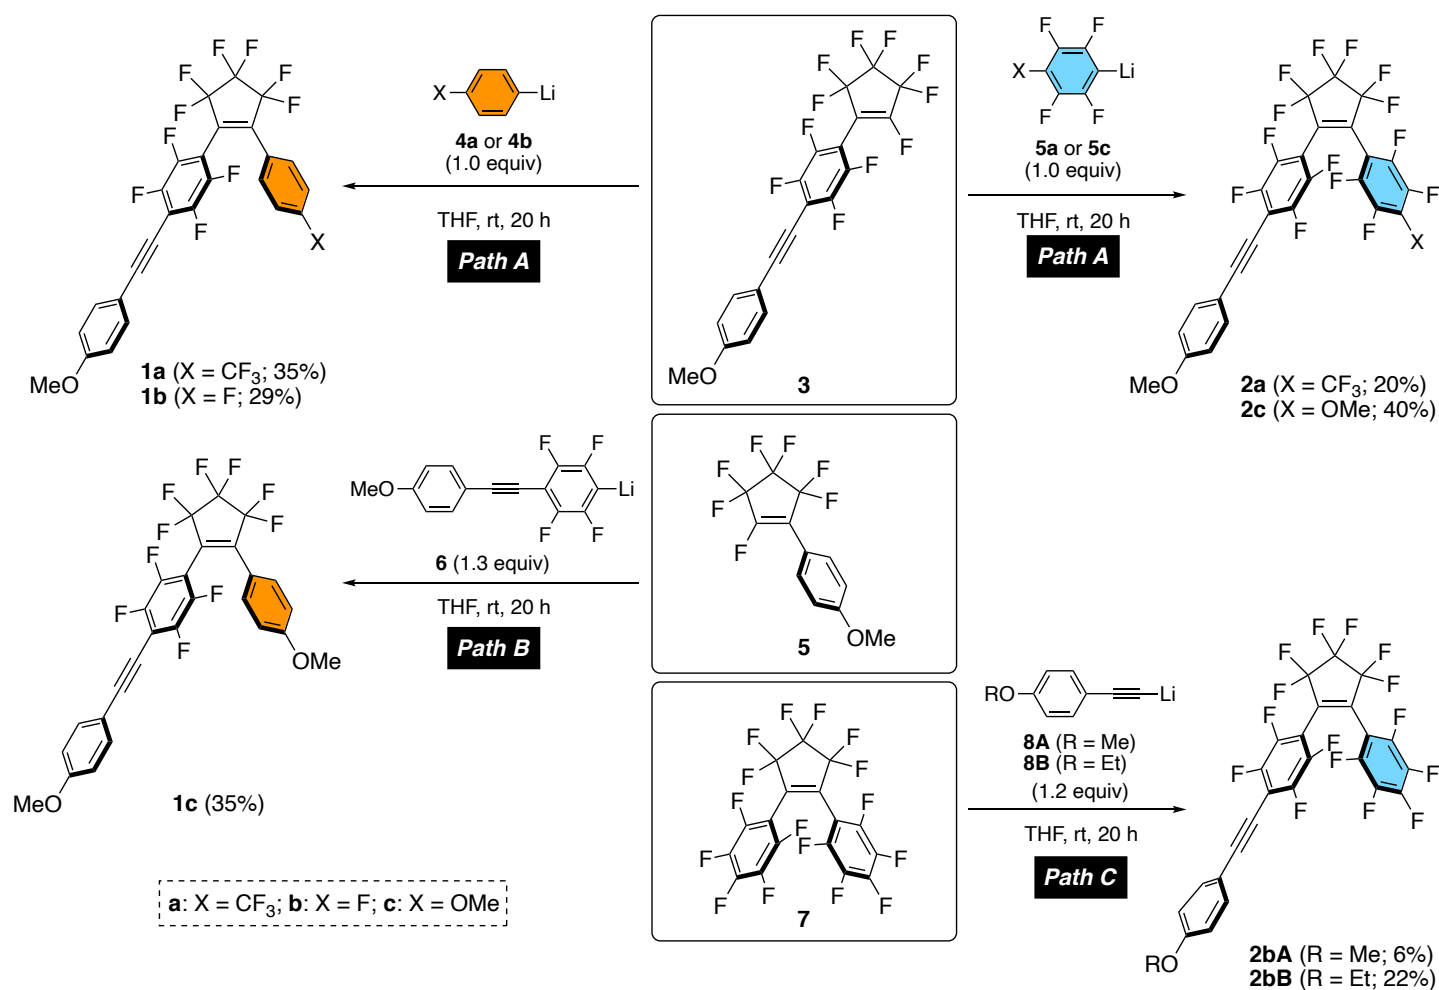

**Figure S1.** Synthetic scheme for the unsymmetrical twist p-conjugated molecules **1a–c** and **2a–c** used in this study.

### 1.1. Typical procedure for the synthesis of 1-[2,3,5,6-Tetrafluoro-4-{2(4-methoxyphenyl)ethyn-1-yl}phenyl]-2-(4-trifluoromethylphenyl)-3,3,4,4,5,5-hexafluorocyclopentene (**1a**): Path A

In a two-necked round-bottomed flask, equipped with a Teflon®-coated stirrer bar, was placed 4-bromobenzotrifluoride (0.122 g, 0.5 mmol) in THF (2.0 mL). To the solution was added slowly *n*-BuLi (1.6 mol L<sup>-1</sup> hexane solution, 0.36 mL, 0.6 mmol) and the reaction mixture was stirred at that temperature for 0.5 h. To the resultant was added 1-[2,3,5,6-Tetrafluoro-4-{2(4-methoxyphenyl)ethyn-1-yl}phenyl]-2,3,3,4,4,5,5-heptafluorocyclopentene (**3**, 0.38 g, 0.55 mmol) in THF (5 mL) at -78 °C and the whole was raised up to 25 °C and continuously stirred at the temperature for 20 h. The resultant was poured into saturated aqueous NH<sub>4</sub>Cl solution (20 mL), and the crude product was extracted with Et<sub>2</sub>O (10 mL, three times) and organic layer was washed with brine (20 mL, once). Organic layer collected was dried over anhydrous Na<sub>2</sub>SO<sub>4</sub>, which was separated by atmospheric filtration. The filtrate was evaporated in vacuo and subjected to silica-gel column chromatography (eluent: hexane/EtOAc = 10/1), followed by recrystallization from CH<sub>2</sub>Cl<sub>2</sub>/MeOH (v/v = 1/1), to obtain the title compound **1a** in 35% yield (0.10 g, 0.2 mmol) as a white solid.

#### 1.1.1. 1-[2,3,5,6-Tetrafluoro-4-{2(4-methoxyphenyl)ethyn-1-yl}phenyl]-2-(4-trifluoromethylphenyl)-3,3,4,4,5,5-hexafluorocyclopentene (**1a**)

Yield: 35% (yellow solid); m.p.: 121.6–124.2 °C; <sup>1</sup>H NMR (CDCl<sub>3</sub>): δ 3.85 (s, 3H), 6.91 (d, *J* = 8.8 Hz, 2H), 7.47 (d, *J* = 8.4 Hz, 2H), 7.52 (d, *J* = 8.8 Hz, 2H), 7.68 (d, *J* = 8.4 Hz, 2H); <sup>13</sup>C NMR (CDCl<sub>3</sub>): δ 55.4, 72.8 (t, *J* = 4.4 Hz), 104.9

(t,  $J = 3.7$  Hz), 105.9 (t,  $J = 19.1$  Hz), 108.5 (t,  $J = 17.6$  Hz), 110.8 (t,  $J = 24.9$  Hz), 112.0–119.0 (m, 3F), 113.1, 114.3, 123.3 (q,  $J = 272.2$  Hz), 126.2 (q,  $J = 3.7$  Hz), 128.6, 130.0, 133.3 (q,  $J = 33.7$  Hz), 133.8, 143.9 (dd,  $J = 252.3$ , 14.7 Hz), 146.5 (tt,  $J = 23.4$ , 6.6 Hz), 146.6 (dd,  $J = 254.5$ , 13.9 Hz), 161.1;  $^{19}\text{F}$  NMR ( $\text{CDCl}_3$ ):  $\delta$  –63.80 (s, 3F), –111.4 (s, 2F), –111.8 (brs, 2F), –132.28 (t,  $J = 4.1$  Hz, 2F), –135.02 to –135.17 (m, 2F), –138.65 to –138.84 (m, 2F); IR (KBr):  $\nu$  2979, 22851, 2224, 1603, 1478, 1324, 1134, 980, 839  $\text{cm}^{-1}$ ; HRMS: (FAB+)  $m/z$   $[\text{M}]^+$  calcd for  $\text{C}_{27}\text{H}_{11}\text{F}_{13}\text{O}$ : 598.0602; found: 598.0602.

**1.1.2. 1-[2,3,5,6-Tetrafluoro-4-{2(4-methoxyphenyl)ethyn-1-yl}phenyl]-2-(4-fluorophenyl)-3,3,4,4,5,5-hexafluorocyclopentene (**1b**)**

Yield: 29% (white solid); m.p.: 101.4–101.9 °C;  $^1\text{H}$  NMR ( $\text{CDCl}_3$ ):  $\delta$  3.85 (s, 3H), 6.92 (d,  $J = 8.8$  Hz, 2H), 7.10 (t,  $J = 8.8$  Hz, 2H), 7.35 (dd,  $J = 8.8$ , 4.8 Hz, 2H), 7.53 (d,  $J = 8.8$  Hz, 2H);  $^{13}\text{C}$  NMR ( $\text{CDCl}_3$ ):  $\delta$  55.4, 72.9 (t,  $J = 3.6$  Hz), 104.7 (t,  $J = 3.6$  Hz), 106.6 (t,  $J = 19.1$  Hz), 108.2 (t,  $J = 15.3$  Hz), 110.8 (t,  $J = 24.8$  Hz), 112.0–119.1 (m), 113.2, 114.3, 116.7 (d,  $J = 22.7$  Hz), 122.6 (d,  $J = 2.2$  Hz), 127.6 (t,  $J = 23.5$  Hz), 130.4 (d,  $J = 8.8$  Hz), 133.7, 143.9 (dd,  $J = 251.5$ , 13.9 Hz), 146.57 (t,  $J = 24.2$  Hz), 146.6 (dd,  $J = 254.4$ , 13.9 Hz), 161.0, 163.1, 165.6;  $^{19}\text{F}$  NMR ( $\text{CDCl}_3$ ):  $\delta$  –107.01 to –107.13 (m, 1F), –111.48 (s, 2F), –111.59 (s, 2F), –132.40 (quin,  $J = 5.3$  Hz, 2F), –135.37 (q,  $J = 9.4$  Hz, 2F), –138.69 to –138.90 (m, 2F); IR (KBr):  $\nu$  3028, 2948, 2850, 2209, 1603, 1515, 1486, 1251, 1139, 1058, 981, 831  $\text{cm}^{-1}$ ; HRMS: (FAB+)  $m/z$   $[\text{M}]^+$  calcd for  $\text{C}_{26}\text{H}_{11}\text{F}_{11}\text{O}$ : 548.0634; found: 548.0628.

**1.1.3. 1-[2,3,5,6-Tetrafluoro-4-{2(4-methoxyphenyl)ethyn-1-yl}phenyl]-2-{4-(trifluoromethyl)-2,3,5,6-tetrafluorophenyl}-3,3,4,4,5,5-hexafluorocyclopentene (**2a**)**

Yield: 20% (white solid); m.p.: 142.3–143.2 °C;  $^1\text{H}$  NMR ( $\text{CDCl}_3$ ):  $\delta$  3.85 (s, 3H), 6.91 (d,  $J = 8.8$  Hz, 2H), 7.52 (d,  $J = 8.8$  Hz, 2H);  $^{13}\text{C}$  NMR ( $\text{CDCl}_3$ ):  $\delta$  55.4, 72.8 (t,  $J = 3.6$  Hz), 104.2 (t,  $J = 16.9$  Hz), 105.8 (t,  $J = 3.6$  Hz), 109.5 (t,  $J = 17.6$  Hz), 110.2 (t,  $J = 17.6$  Hz), 112.9, 114.3, 116.8–118.0 (m), 120.1 (q,  $J = 276.5$  Hz), 133.8, 135.5 (t,  $J = 33.7$  Hz), 138.0 (t,  $J = 5.8$  Hz), 143.6 (dd,  $J = 253.7$ , 14.7 Hz), 144.1 (dd,  $J = 243.5$ , 14.7 Hz), 146.7 (dd,  $J = 228.9$ , 13.2 Hz), 161.2, several carbon signals cannot be assigned due to extremely complex spin-spin coupling between carbon and fluorine atoms;  $^{19}\text{F}$  NMR ( $\text{CDCl}_3$ ):  $\delta$  –57.10 (t,  $J = 21.8$  Hz, 3F), –111.60 (s, 2F), –111.83 (s, 2F), –132.5 (s, 2F), –134.38 to –134.60 (m, 2F), –135.04 to –135.28 (m, 2F), –137.10 to –137.44 (m, 2F), –138.50 to –138.64 (m, 2F); IR (KBr):  $\nu$  3029, 2966, 2851, 2225, 1605, 1485, 1342, 1249, 1159, 1034, 993, 973, 834  $\text{cm}^{-1}$ ; HRMS: (FAB+)  $m/z$   $[\text{M}]^+$  calcd for  $\text{C}_{27}\text{H}_7\text{F}_{17}\text{O}$ : 670.0225; found: 670.0236.

**1.1.4. 1-[2,3,5,6-Tetrafluoro-4-{2(4-methoxyphenyl)ethyn-1-yl}phenyl]-2-(2,3,5,6-tetrafluoro-4-methoxyphenyl)-3,3,4,4,5,5-hexafluorocyclopentene (**2c**)**

Yield: 40% (white solid); m.p.: 102.9–103.9 °C;  $^1\text{H}$  NMR ( $\text{CDCl}_3$ ):  $\delta$  3.85 (s, 3H), 4.16 (s, 3H), 6.91 (d,  $J = 8.8$  Hz, 2H), 7.52 (d,  $J = 8.8$  Hz, 2H);  $^{13}\text{C}$  NMR ( $\text{CDCl}_3$ ):  $\delta$  55.4, 62.0 (t,  $J = 3.6$  Hz), 72.9, 96.8–100.5 (m), 105.0–105.8 (m), 105.1, 108.4–117.8 (m, 3C for  $\text{CF}_2\text{CF}_2\text{CF}_2$ ), 113.1, 114.3, 133.8, 136.0–138.2 (m), 140.7 (dm,  $J = 281.3$  Hz), 142.3 (dm,  $J = 202.4$  Hz), 144.0 (dm,  $J = 256.3$  Hz), 147.0 (dm,  $J = 196.2$  Hz), 161.1, several carbon signals cannot be assigned due to extremely complex spin-spin coupling between carbon and fluorine atoms;  $^{19}\text{F}$  NMR ( $\text{CDCl}_3$ ):  $\delta$  –111.71 (s, 2F), –111.96 (s, 2F), –132.65 (s, 2F), –135.00 (q,  $J = 9.8$  Hz, 2F), –138.30 to –138.58 (m, 2F), –138.74 to –138.98 (m, 2F), –155.88 to –156.08 (m, 2F); IR (KBr):  $\nu$  3018, 2948, 2845, 2224, 1605, 1494, 1270, 1270, 1166, 1070, 985, 831  $\text{cm}^{-1}$ ; HRMS: (FAB+)  $m/z$   $[\text{M}]^+$  calcd for  $\text{C}_{27}\text{H}_{10}\text{F}_{14}\text{O}_2$ : 632.0457; found: 632.0449.

## 1.2. Typical synthetic procedure for 1-[2,3,5,6-Tetrafluoro-4-{2(4-methoxyphenyl)ethyn-1-yl}phenyl]-2-(4-methoxyphenyl)-3,3,4,4,5,5-hexafluorocyclopentene (**1c**): Path B

In a two-necked round-bottomed flask, equipped with a Teflon®-coated stirrer bar, was placed 1-bromo-2,3,5,6-tetrafluoro-4-{2-(4-methoxyphenyl)ethyn-1-yl}benzene (0.14 g, 0.4 mmol) in THF (4.0 mL) and the solution was cooled to  $-78\text{ }^{\circ}\text{C}$ . To the solution was added slowly *n*-BuLi (1.6 mol L<sup>-1</sup> hexane solution, 0.30 mL, 0.5 mmol) and the whole was stirred at  $-78\text{ }^{\circ}\text{C}$  for 0.5 h. To the resultant solution was added 1-(4-methoxyphenyl)-2,3,3,4,4,5,5-heptafluorocyclopentene (**5**, 0.086 g, 0.29 mmol) in THF (4.0 mL), and the reaction temperature was raised up to  $25\text{ }^{\circ}\text{C}$  and the whole was stirred at  $25\text{ }^{\circ}\text{C}$  for 12 h. The reaction mixture was poured into saturated aqueous NH<sub>4</sub>Cl solution (20 mL), and the crude product was extracted with Et<sub>2</sub>O (10 mL, three times) and organic layer was washed with brine (20 mL, once). Organic layer collected was dried over anhydrous Na<sub>2</sub>SO<sub>4</sub>, which was separated by atmospheric filtration. The filtrate was evaporated in vacuo and subjected to silica-gel column chromatography (eluent: hexane/EtOAc = 10/1), followed by recrystallization from CH<sub>2</sub>Cl<sub>2</sub>/MeOH (v/v = 1/1), to obtain the title compound **1c** in 35% yield (0.076 g, 0.1 mmol) as a white solid.

### 1.2.1. 1-[2,3,5,6-Tetrafluoro-4-{2(4-methoxyphenyl)ethyn-1-yl}phenyl]-2-(4-methoxyphenyl)-3,3,4,4,5,5-hexafluorocyclopentene (**1c**)

Yield: 35% (white solid); m.p.:  $111.9\text{--}113.1\text{ }^{\circ}\text{C}$ ; <sup>1</sup>H NMR (CDCl<sub>3</sub>):  $\delta$  3.81 (s, 3H), 3.84 (s, 3H), 6.87 (d, *J* = 8.9 Hz, 2H), 6.90 (d, *J* = 8.9 Hz, 2H), 7.29 (d, *J* = 8.8 Hz, 2H), 7.52 (d, *J* = 8.8 Hz, 2H); <sup>13</sup>C NMR (CDCl<sub>3</sub>):  $\delta$  55.4, 72.9 (t, *J* = 4.4 Hz), 104.3 (t, *J* = 3.7 Hz), 107.5 (t, *J* = 19.1 Hz), 107.8 (tt, *J* = 17.8, 2.5 Hz), 110.9 (tquint, *J* = 270.8, 25.0 Hz), 112.0–119.0 (m, 2C for CF<sub>2</sub>CF<sub>2</sub>), 113.3, 114.3, 114.8, 118.7, 124.7 (t, *J* = 24.9 Hz), 129.9, 133.7, 144.3 (dd, *J* = 288.4, 14.3 Hz), 146.8 (dd, *J* = 293.8, 14.2 Hz), 146.4–147.2 (m), 161.0, 162.1, several carbon signals cannot be assigned due to extremely complex spin-spin coupling between carbon and fluorine atoms; <sup>19</sup>F NMR (CDCl<sub>3</sub>):  $\delta$  -111.13 (s, 4F), -132.44 (quint, *J* = 4.7 Hz, 2F), -135.5 (dd, *J* = 20.6, 10.9 Hz, 2F), -138.63 to -138.85 (m, 2F); IR (KBr):  $\nu$  3016, 2938, 2842, 2225, 1606, 1516, 1486, 1258, 1137, 1060, 996, 836 cm<sup>-1</sup>; HRMS: (FAB+) *m/z* [M]<sup>+</sup> calcd for C<sub>27</sub>H<sub>14</sub>F<sub>10</sub>O<sub>2</sub>: 560.0834; found: 560.0844.

## 1.3. Typical synthetic procedure for 1-[2,3,5,6-Tetrafluoro-4-{2(4-methoxyphenyl)ethyn-1-yl}phenyl]-2-(2,3,4,5,6-pentafluorophenyl)-3,3,4,4,5,5-hexafluorocyclopentene (**2bA**): Path C

In a two-necked round-bottomed flask, equipped with a stirrer bar, was placed 4-methoxyphenyllithium (**8A**, 2.1 mmol), prepared from the reaction of 4-ethynylanisole (0.28 g, 2.1 mmol) and *n*-BuLi (1.6 mol L<sup>-1</sup> hexane solution, 1.4 mL, 2.3 mmol) in THF at  $0\text{ }^{\circ}\text{C}$  for 0.5 h, and the whole was cooled to  $-78\text{ }^{\circ}\text{C}$ . To the solution was added dropwise a THF (5.0 mL) solution of 1,2-bis(pentafluorophenyl)-3,3,4,4,5,5-hexafluorocyclopentene (**7**, 0.93 g, 1.8 mmol). After being stirred at  $25\text{ }^{\circ}\text{C}$  for 16 h, the resultant solution was poured into saturated aqueous NH<sub>4</sub>Cl solution (20 mL), and the crude product was extracted with Et<sub>2</sub>O (10 mL, three times) and organic layer was washed with brine (20 mL, once). Organic layer collected was dried over anhydrous Na<sub>2</sub>SO<sub>4</sub>, which was separated by atmospheric filtration. The filtrate was evaporated in vacuo and subjected to silica-gel column chromatography (eluent: hexane/EtOAc = 20/1), followed by recrystallization from CH<sub>2</sub>Cl<sub>2</sub>/MeOH (v/v = 1/1), to obtain the title compound **2bA** in 6% yield (0.066 g, 0.1 mmol) as a white solid.

### 1.3.1. 1-[2,3,5,6-Tetrafluoro-4-{2(4-methoxyphenyl)ethyn-1-yl}phenyl]-2-(2,3,4,5,6-pentafluorophenyl)-3,3,4,4,5,5-hexafluorocyclopentene (**2bA**)

Yield: 6% (white solid); m.p.:  $118.4\text{--}119.6\text{ }^{\circ}\text{C}$ ; <sup>1</sup>H NMR (CDCl<sub>3</sub>): 3.85 (s, 3H), 6.91 (d, *J* = 8.8 Hz, 2H), 7.52 (d, *J* = 8.8



Hz, 2H);  $^{13}\text{C}$  NMR ( $\text{CDCl}_3$ ):  $\delta$  55.4, 72.8 (t,  $J = 4.4$  Hz), 101.4 (td,  $J = 18.9, 3.7$  Hz), 104.7 (t,  $J = 19.1$  Hz), 105.5 (t,  $J = 2.9$  Hz), 109.2 (t,  $J = 17.6$  Hz), 110.7 (tquint,  $J = 275.1, 25.8$  Hz), 113.0, 114.3, 114.5 (tt,  $J = 261.9, 23.8$  Hz), 133.8, 136.1 (t,  $J = 26.3$  Hz), 137.5 (t,  $J = 31.5$  Hz), 137.9 (dtd,  $J = 253.7, 13.2, 5.1$  Hz), 141.7–145.0 (dm,  $J = 261.1$  Hz), 143.7 (ddt,  $J = 253.8, 14.6, 4.4$  Hz), 143.0–145.7 (dm,  $J = 250.8$  Hz), 146.6 (ddt,  $J = 255.2, 13.9, 4.4$  Hz), 161.2, one carbon signals cannot be assigned due to extremely complex spin-spin coupling between carbon and fluorine atoms;  $^{19}\text{F}$  NMR ( $\text{CDCl}_3$ ): d –111.88 (s, 2F), –112.03 (s, 2F), –132.65 (brs, 2F), –134.7 to –134.9 (m, 2F), –136.8 to –137.04 (m, 2F), –138.56 to –138.78 (m, 2F), –146.88 (t,  $J = 19.2$  Hz, 1F), –158.57 to –158.83 (m, 2F); IR (KBr):  $\nu$  3024, 2949, 2847, 2226, 1605, 1520, 1486, 1247, 1163, 1034, 991, 835  $\text{cm}^{-1}$ ; HRMS: (FAB+)  $m/z$   $[\text{M}]^+$  calcd for  $\text{C}_{26}\text{H}_7\text{F}_{15}\text{O}$ : 620.0257; found: 620.0247.

**1.3.2. 1-[2,3,5,6-Tetrafluoro-4-{2(4-ethoxyphenyl)ethyn-1-yl}phenyl]-2-(2,3,4,5,6-pentafluorophenyl)-3,3,4,4,5,5-hexafluorocyclopentene (2bB)**

Yield: 22% (white solid); m.p.: 148.6–149.6  $^{\circ}\text{C}$ ;  $^1\text{H}$  NMR ( $\text{CDCl}_3$ ):  $\delta$  1.44 (t,  $J = 7.2$  Hz, 3H), 4.07 (q,  $J = 7.2$  Hz, 2H), 6.90 (d,  $J = 8.8$  Hz, 2H), 7.51 (d,  $J = 8.8$  Hz, 2H);  $^{13}\text{C}$  NMR ( $\text{CDCl}_3$ ):  $\delta$  14.6, 63.7, 72.7 (t,  $J = 4.4$  Hz), 101.4 (t,  $J = 19.8$  Hz), 104.7 (d,  $J = 18.3$  Hz), 105.6 (t,  $J = 3.6$  Hz), 109.2 (t,  $J = 17.6$  Hz), 110.7 (tquint,  $J = 273.5, 24.9$  Hz), 112.8, 114.5 (tt,  $J = 261.6, 24.1$  Hz), 114.8, 133.8, 136.1 (t,  $J = 27.2$  Hz), 137.6 (t,  $J = 25.6$  Hz), 137.9 (dtd,  $J = 253.8, 14.0, 5.9$  Hz), 143.3 (dtt,  $J = 261.2, 13.3, 4.4$  Hz), 143.7 (ddt,  $J = 254.4, 14.6, 4.3$  Hz), 143.0–145.8 (dm,  $J = 256.0$  Hz), 146.6 (ddt,  $J = 255.2, 14.0, 4.4$  Hz), 160.6, one carbon signals cannot be assigned due to extremely complex spin-spin coupling between carbon and fluorine atoms;  $^{19}\text{F}$  NMR ( $\text{CDCl}_3$ ):  $\delta$  –111.88 (s, 2F), –112.03 (s, 2F), –132.65 (quint,  $J = 3.8$  Hz, 2F), –134.82 (dd,  $J = 19.5, 9.9$  Hz, 2F), –136.80 to –137.03 (m, 2F), –138.57 to –138.82 (m, 2F), –146.89 (t,  $J = 21.8$  Hz, 1F), –158.70 (td,  $J = 20.3, 5.3$  Hz, 2F); IR (KBr):  $\nu$  2998, 2884, 2221, 1603, 1519, 1359, 1252, 1064, 995, 838  $\text{cm}^{-1}$ ; HRMS: (FAB+)  $m/z$   $[\text{M}]^+$  calcd for  $\text{C}_{27}\text{H}_9\text{F}_{15}\text{O}$ : 634.0414; found: 634.0430.

## 2. NMR spectra

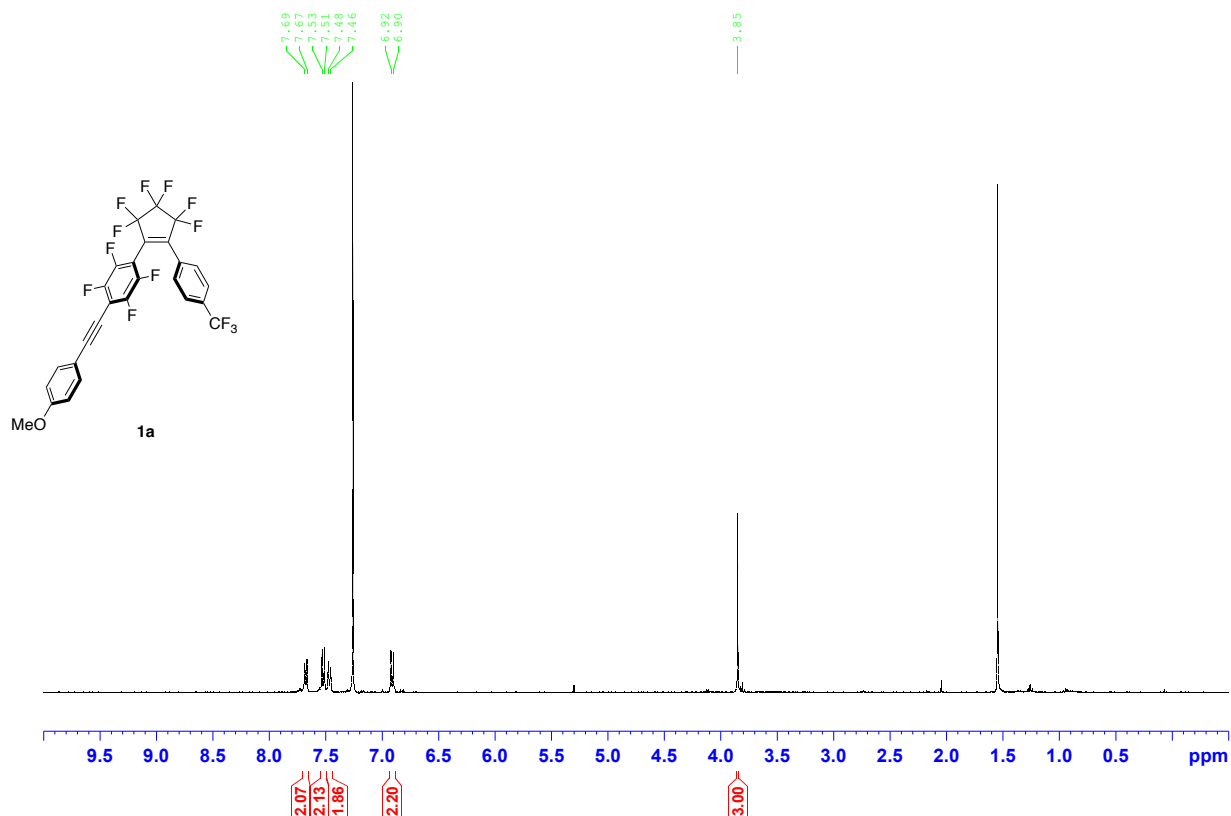

**Figure S2.** <sup>1</sup>H NMR spectrum of **1a** (CDCl<sub>3</sub>, 400 MHz)

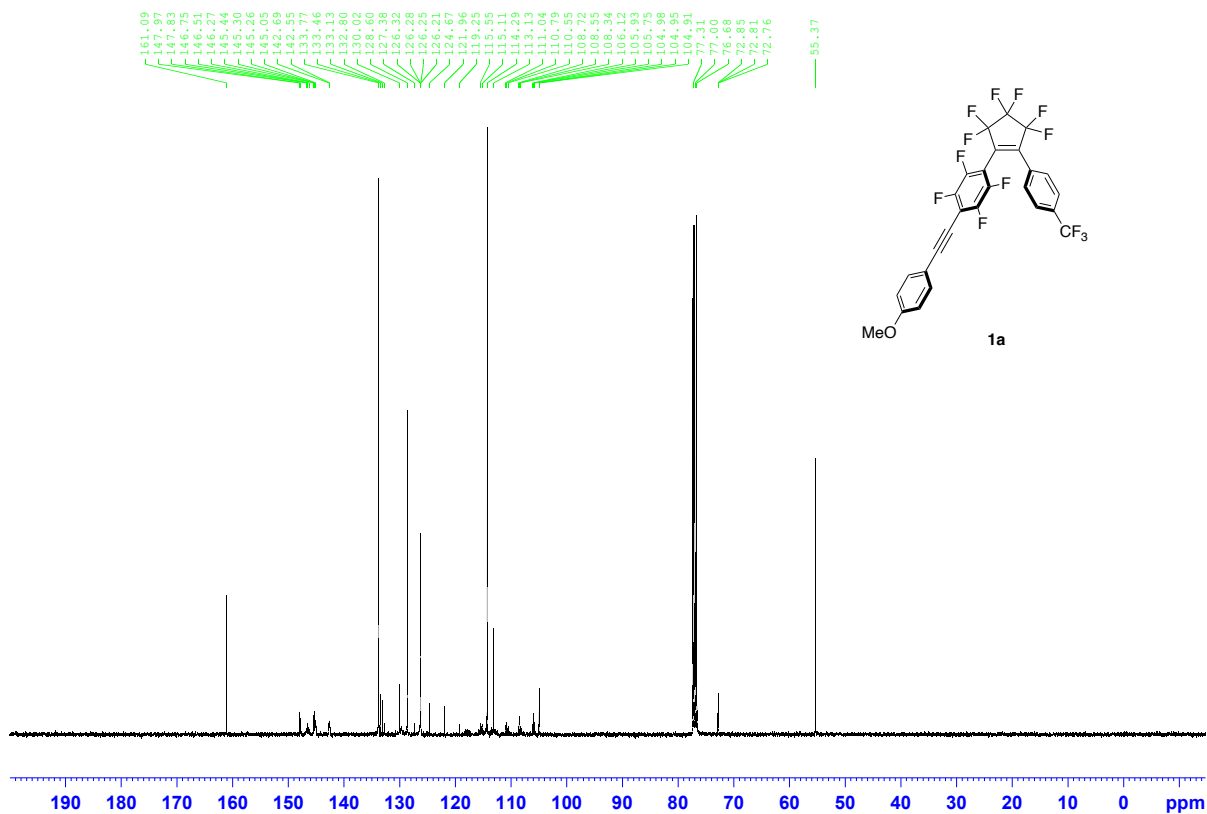

**Figure S3.** <sup>13</sup>C NMR spectrum of **1a** (CDCl<sub>3</sub>, 100 MHz)

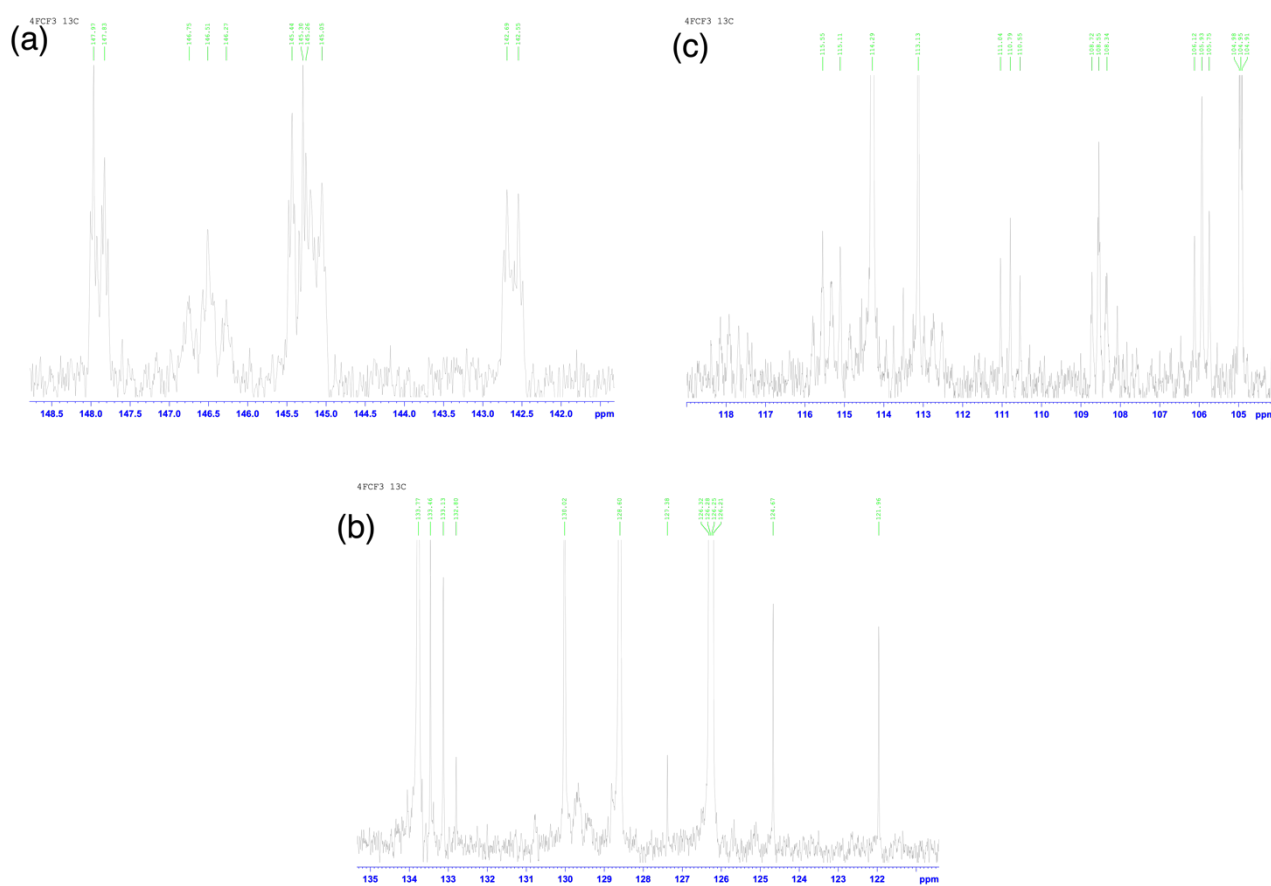

**Figure S4.** Expansion of  $^{13}\text{C}$  NMR spectrum of **1a**: (a) 149–142 ppm; (b) 135–120 ppm; (c) 120–104 ppm.

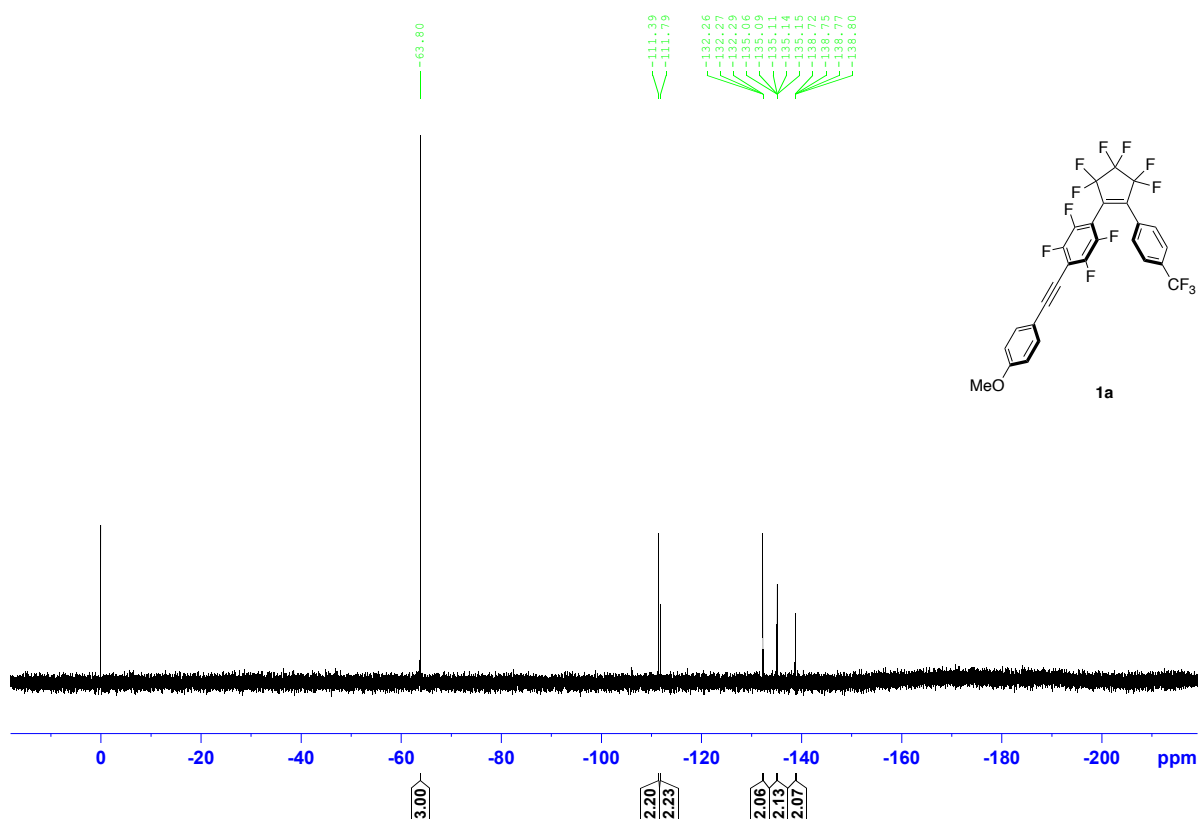

**Figure S5.**  $^{19}\text{F}$  NMR spectrum of **1a** ( $\text{CDCl}_3$ , 376 MHz)

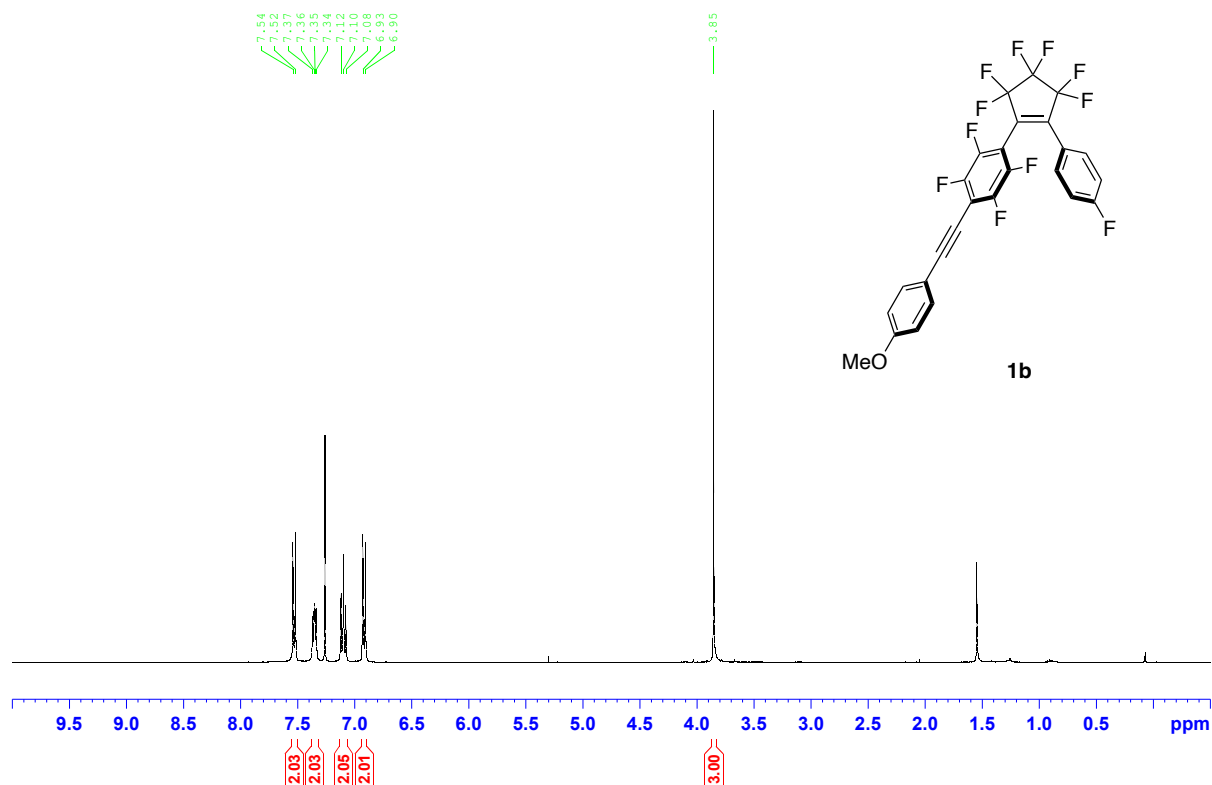

**Figure S6.** <sup>1</sup>H NMR spectrum of **1b** (CDCl<sub>3</sub>, 400 MHz)

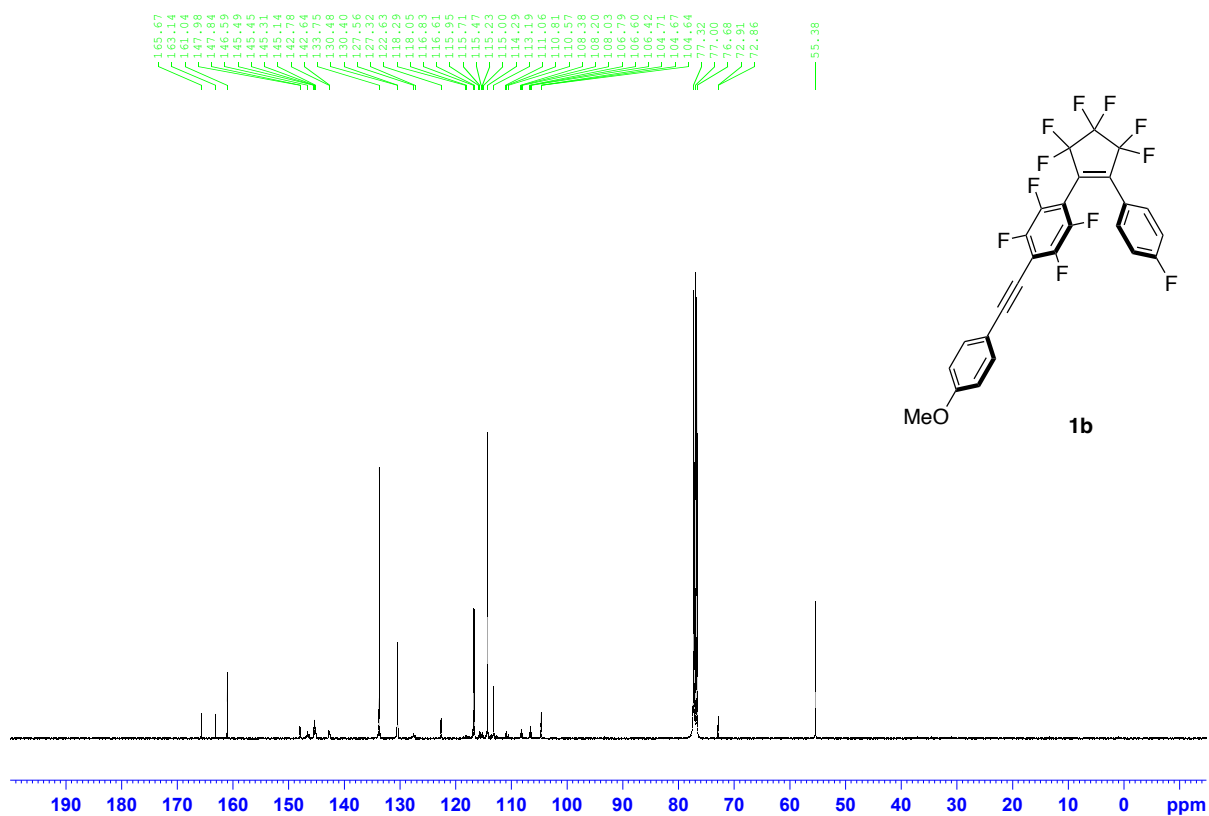

**Figure S7.** <sup>13</sup>C NMR spectrum of **1b** (CDCl<sub>3</sub>, 100 MHz)

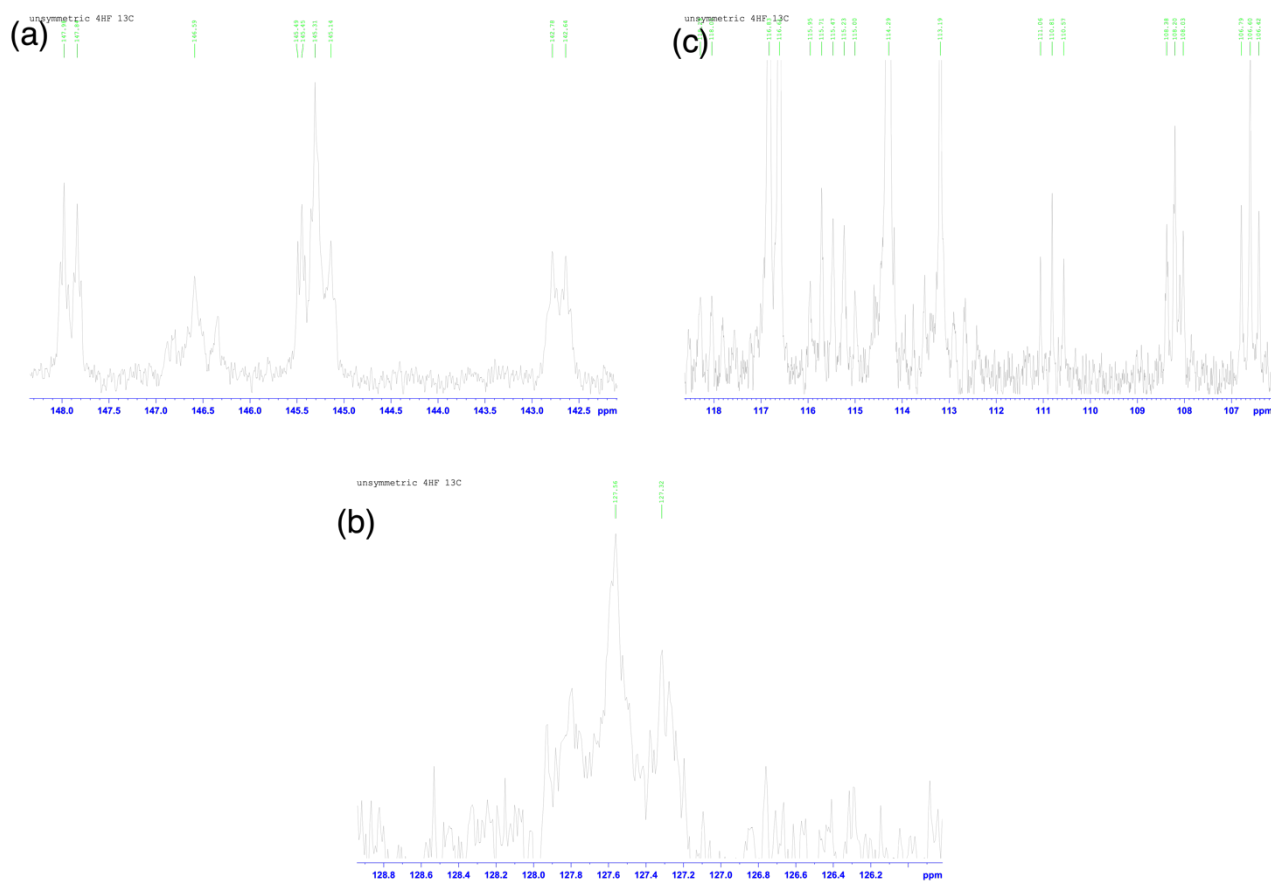

**Figure S8.** Expansion of  $^{13}\text{C}$  NMR spectrum of **1b**: (a) 149–142 ppm; (b) 128–120 ppm; (c) 120–104 ppm.

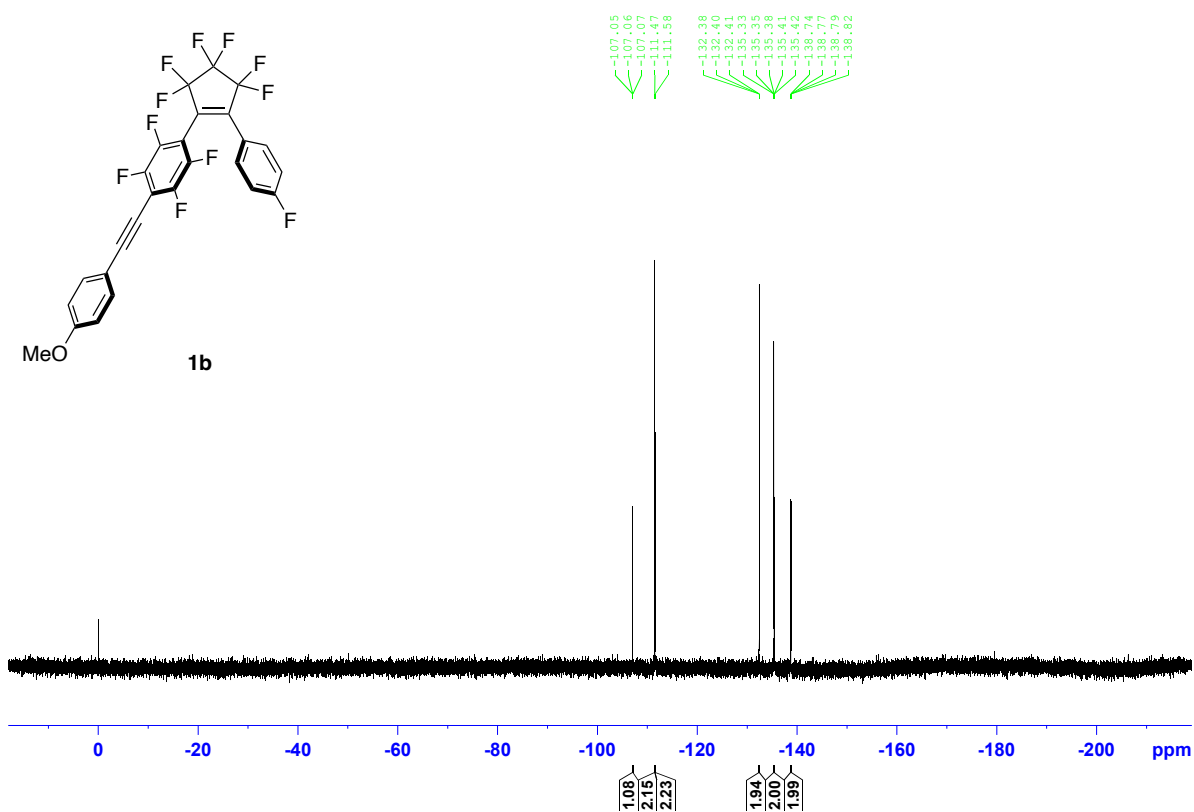

**Figure S9.**  $^{19}\text{F}$  NMR spectrum of **1b** ( $\text{CDCl}_3$ , 376 MHz)

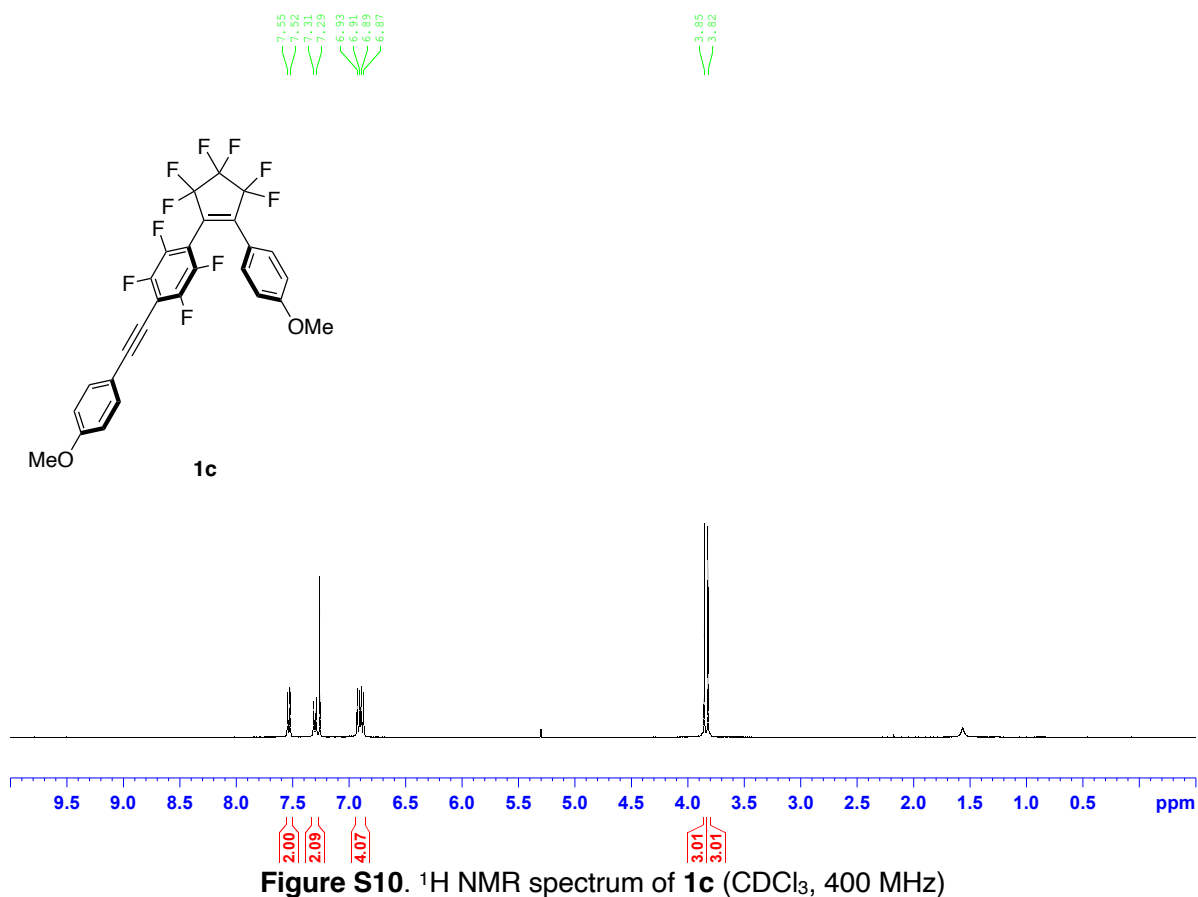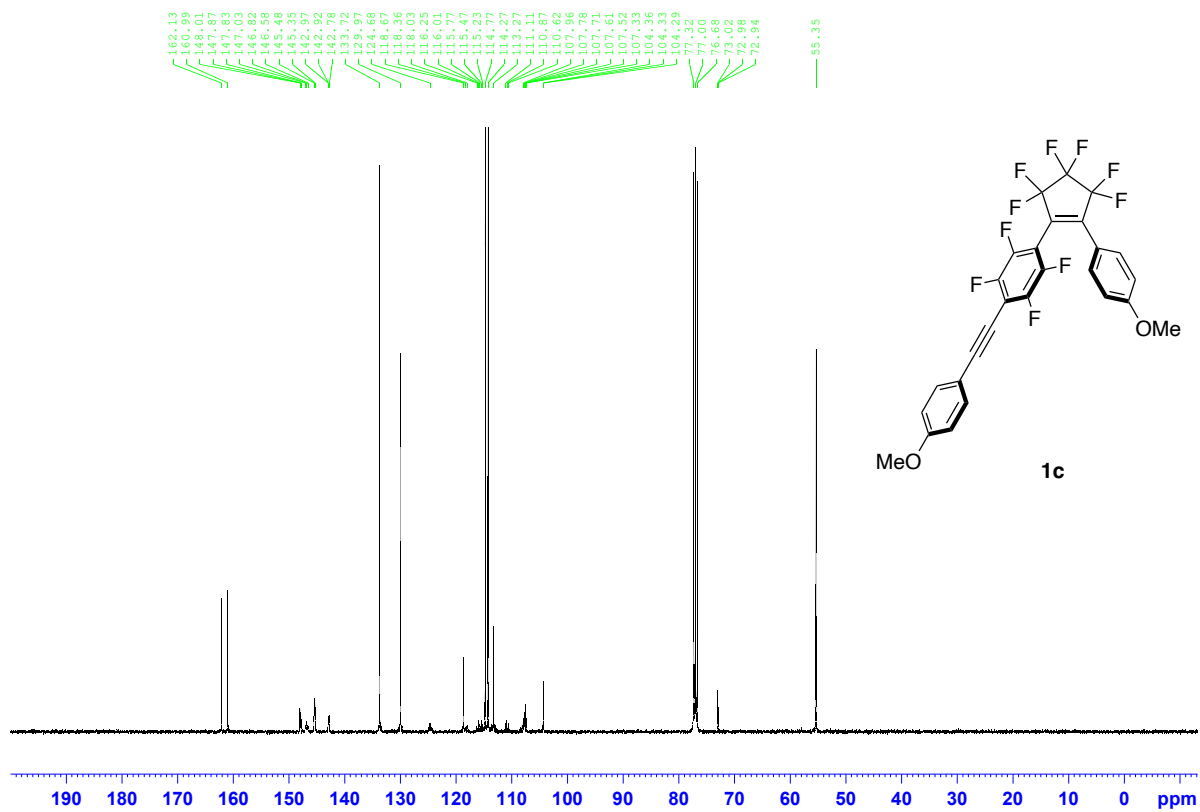

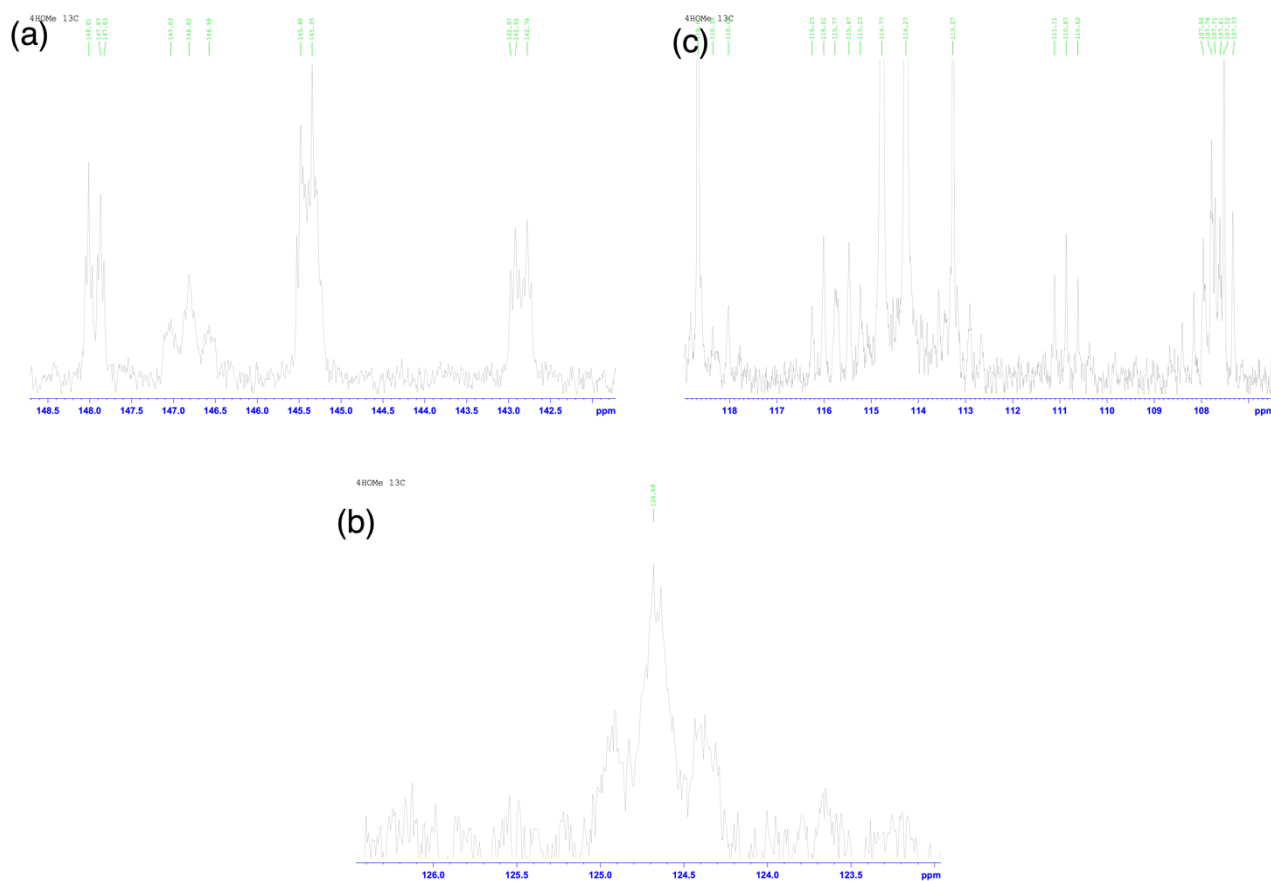

**Figure S12.** Expansion of  $^{13}\text{C}$  NMR spectrum of **1c**: (a) 149–142 ppm; (b) 128–120 ppm; (c) 120–104 ppm.

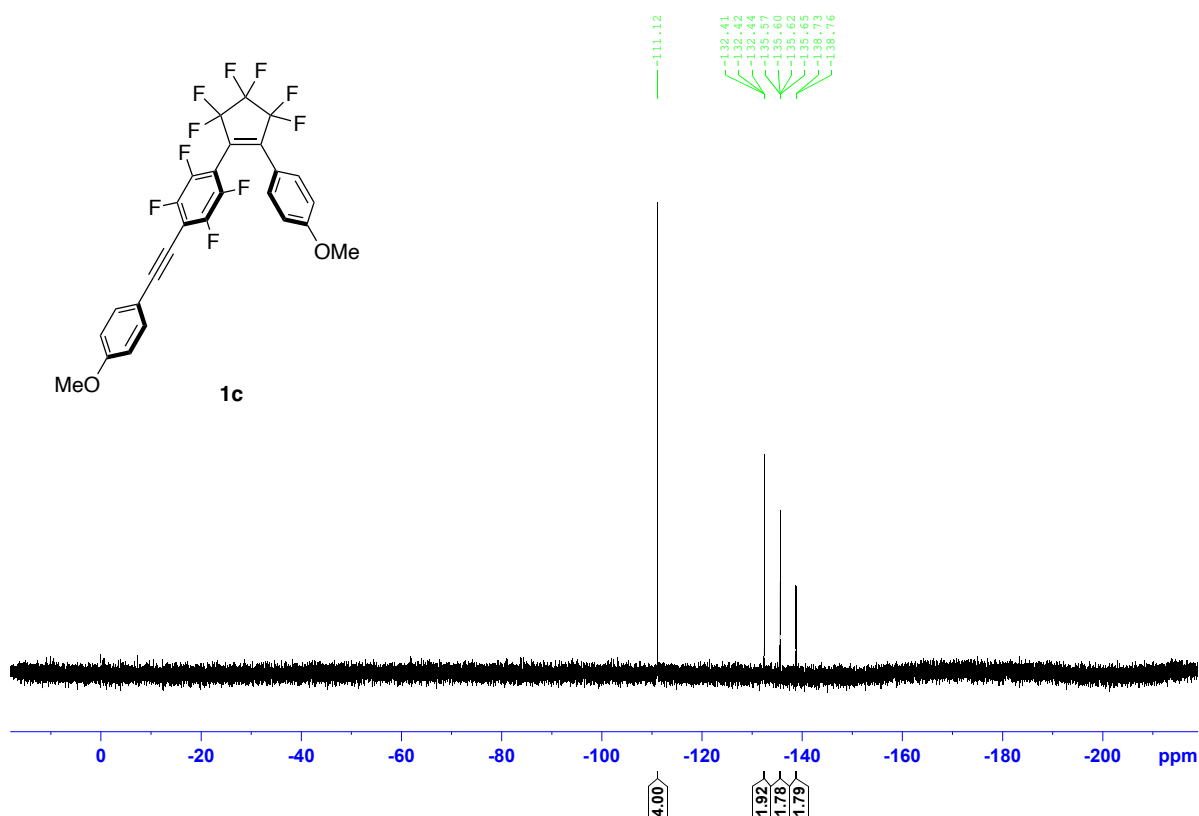

**Figure S13.**  $^{19}\text{F}$  NMR spectrum of **1c** ( $\text{CDCl}_3$ , 400 MHz)

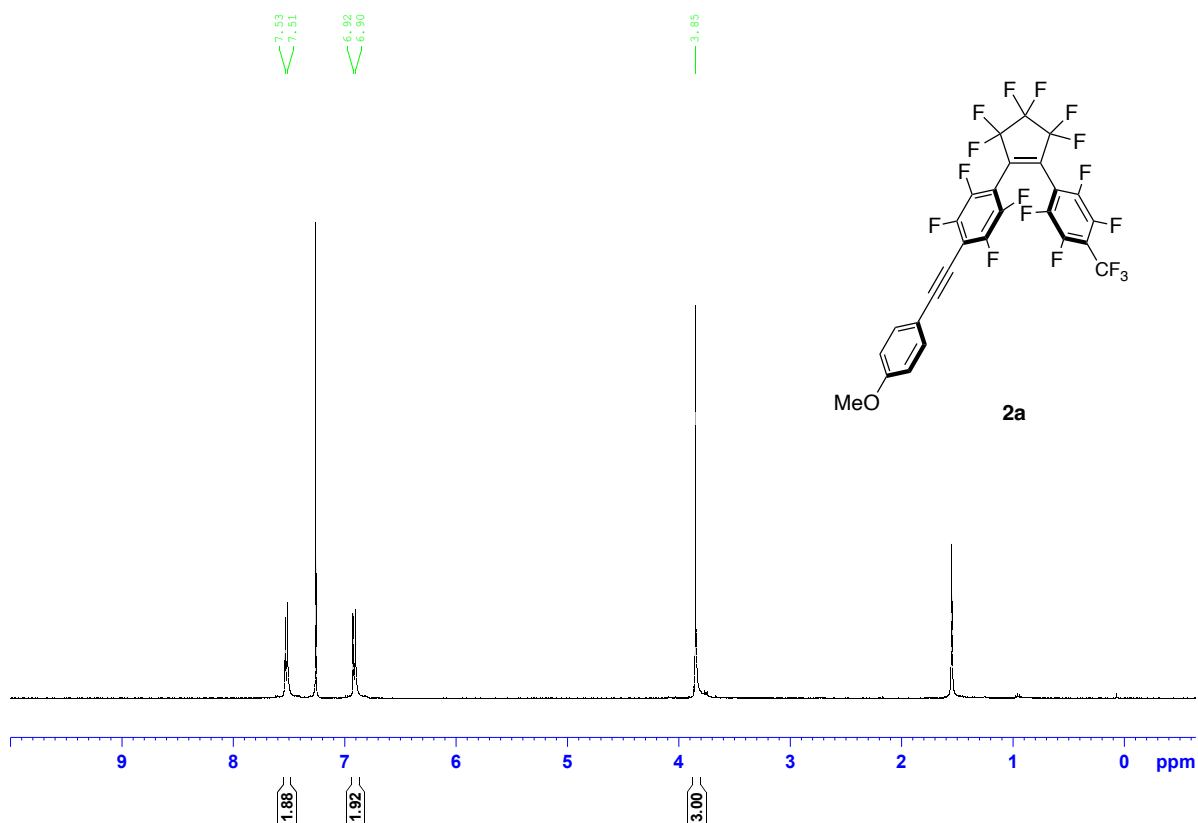

**Figure S14.** <sup>1</sup>H NMR spectrum of **2a** (CDCl<sub>3</sub>, 400 MHz)

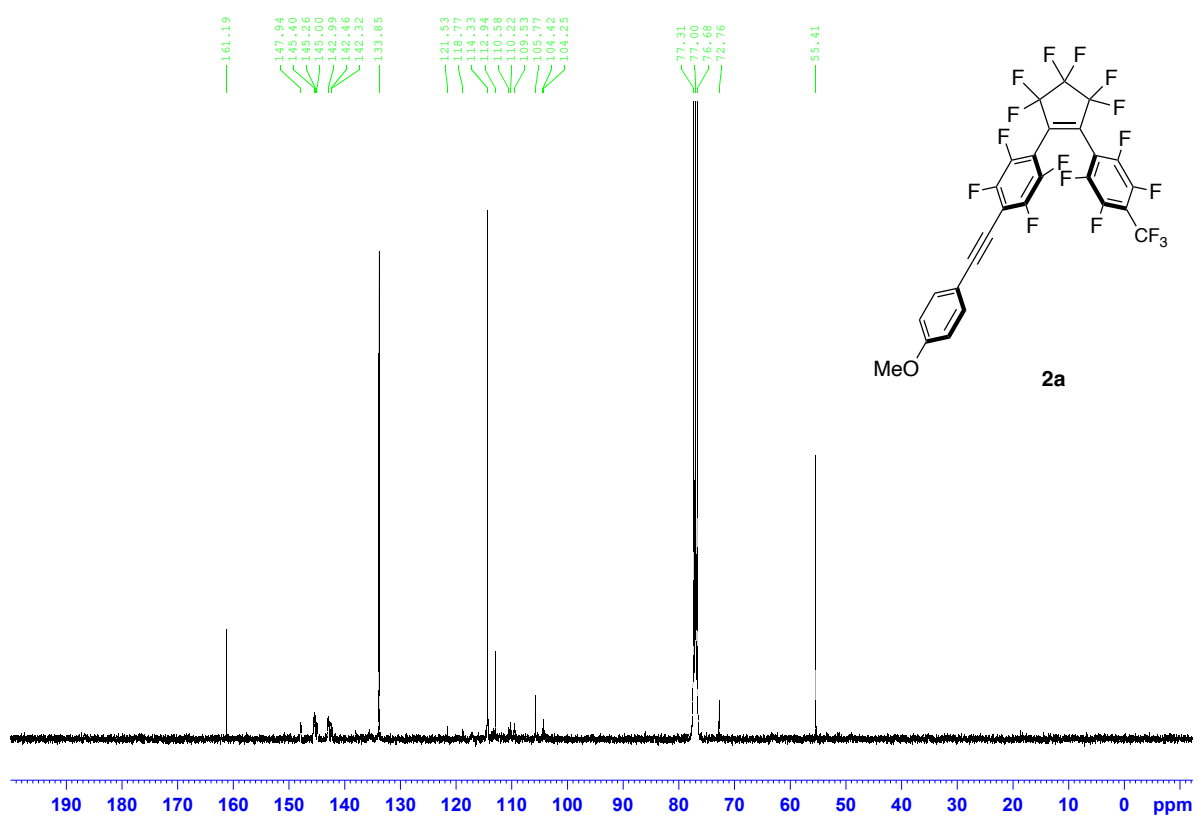

**Figure S15.** <sup>13</sup>C NMR spectrum of **2a** (CDCl<sub>3</sub>, 100 MHz)



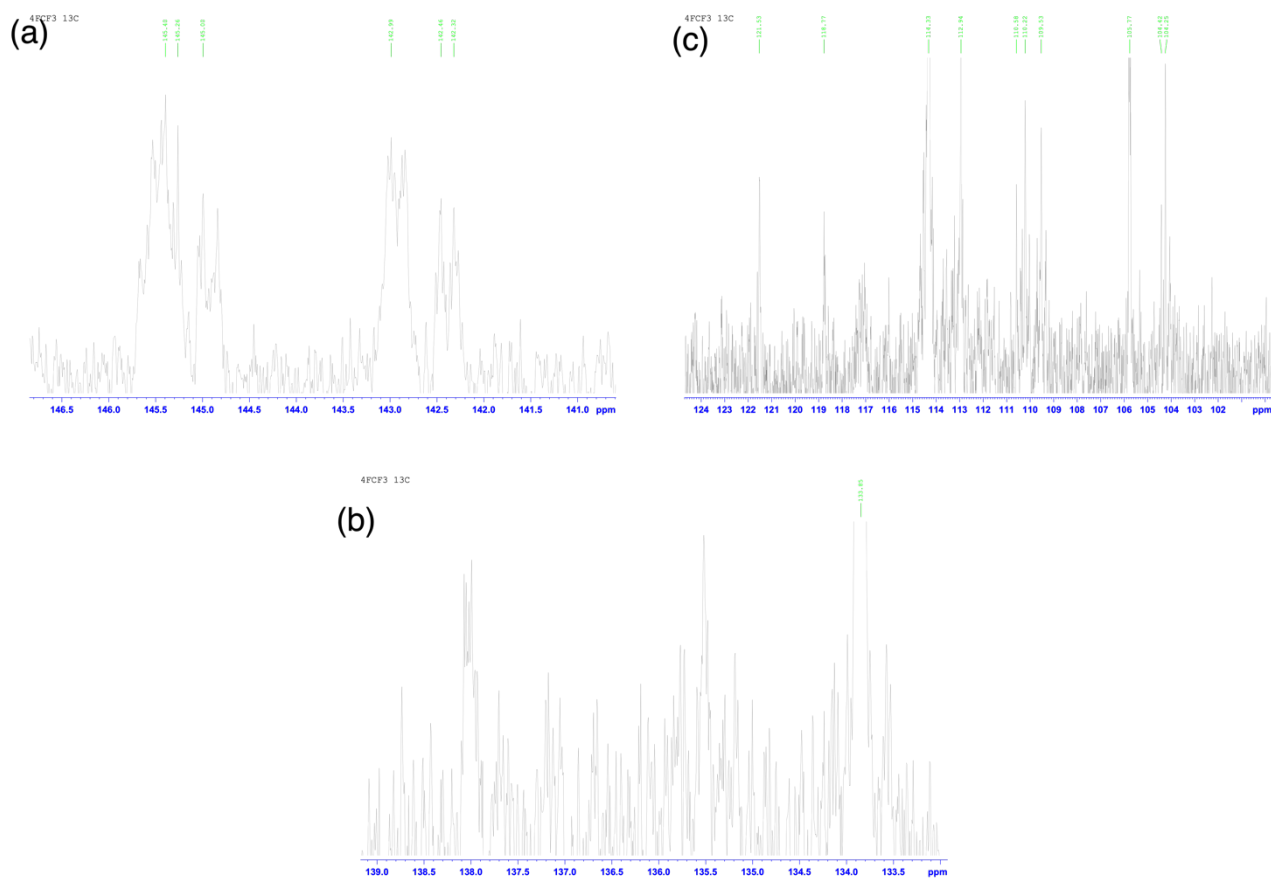

**Figure S16.** Expansion of  $^{13}\text{C}$  NMR spectrum of **2a**: (a) 147–141 ppm; (b) 139–133 ppm; (c) 125–100 ppm.

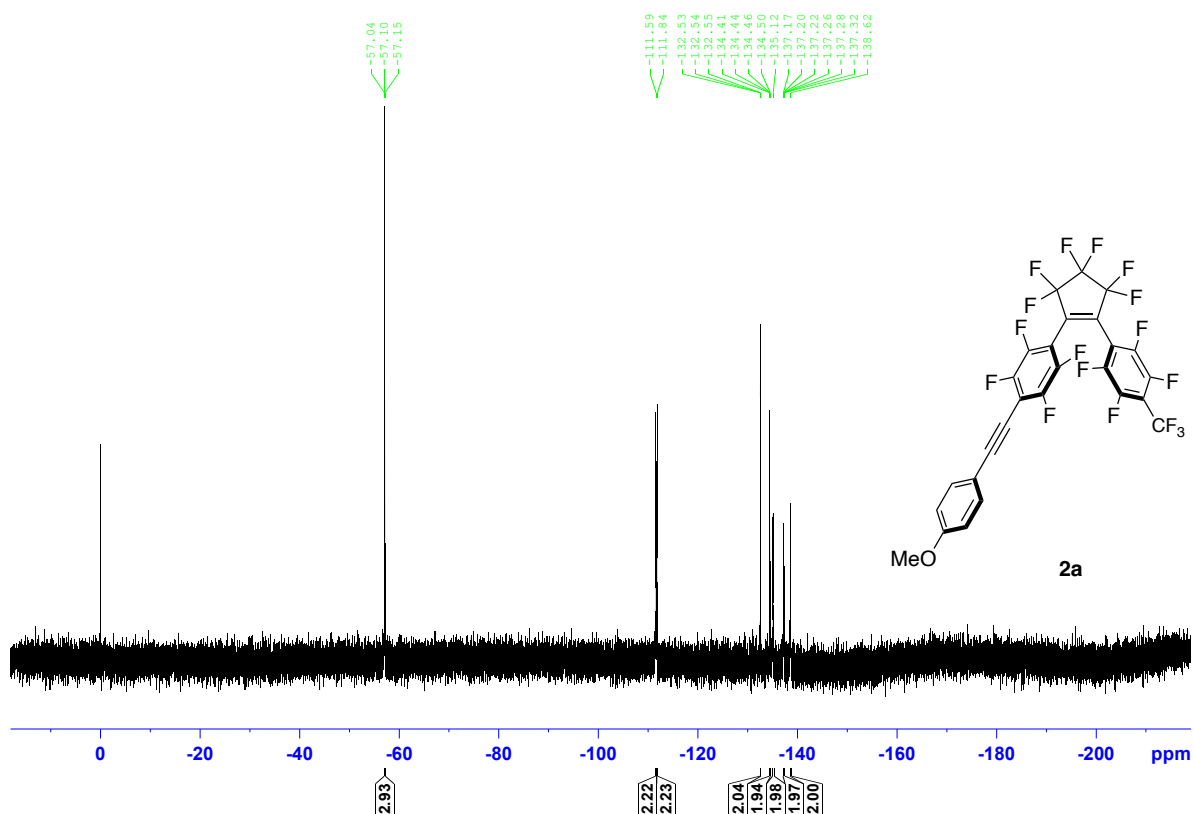

**Figure S17.**  $^{19}\text{F}$  NMR spectrum of **2a** ( $\text{CDCl}_3$ , 376 MHz)

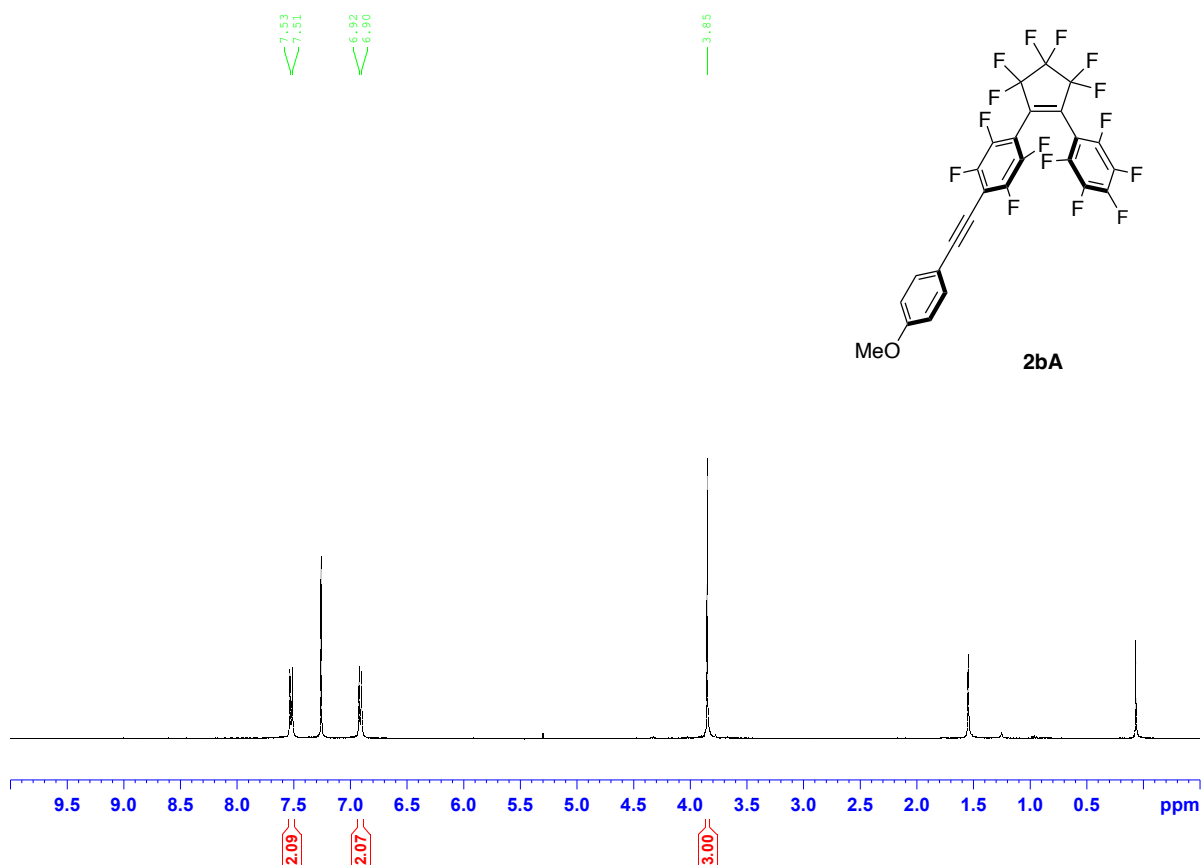

Figure S18.  $^1\text{H}$  NMR spectrum of **2bA** (CDCl<sub>3</sub>, 400 MHz)

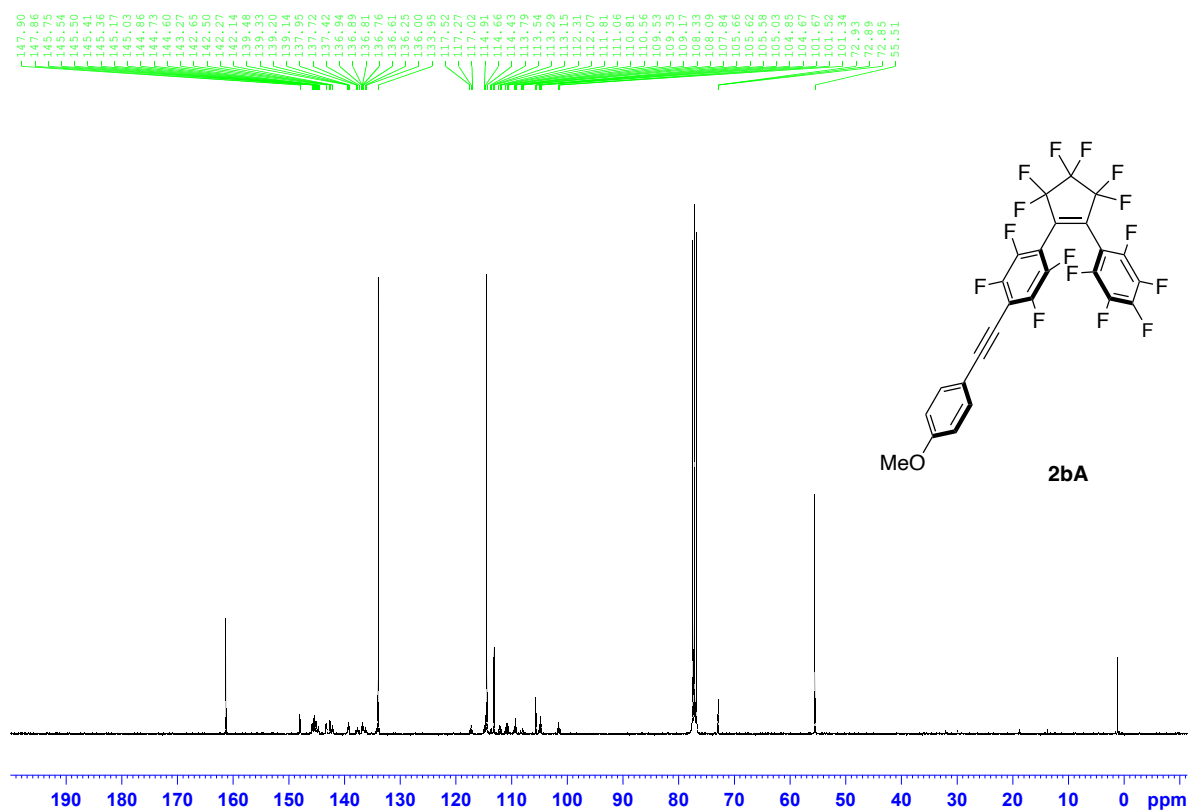

Figure S19.  $^{13}\text{C}$  NMR spectrum of **2bA** (CDCl<sub>3</sub>, 100 MHz)



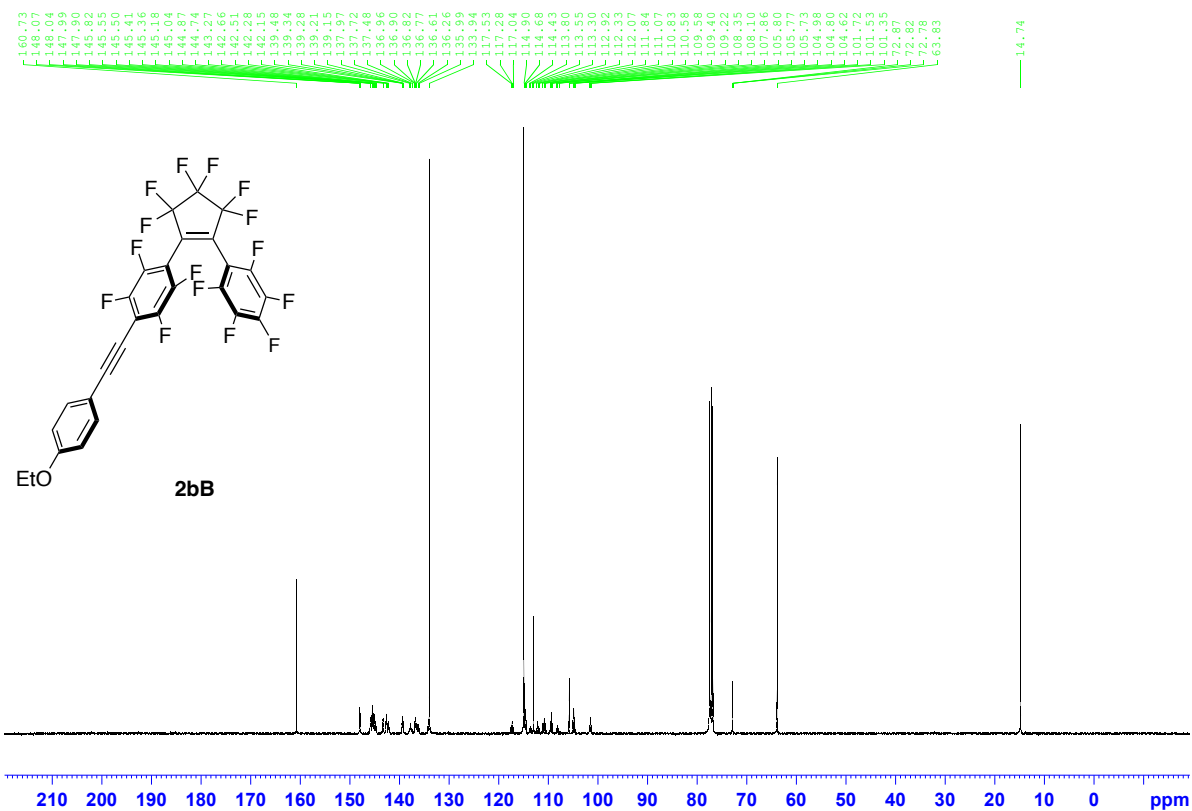

S-16



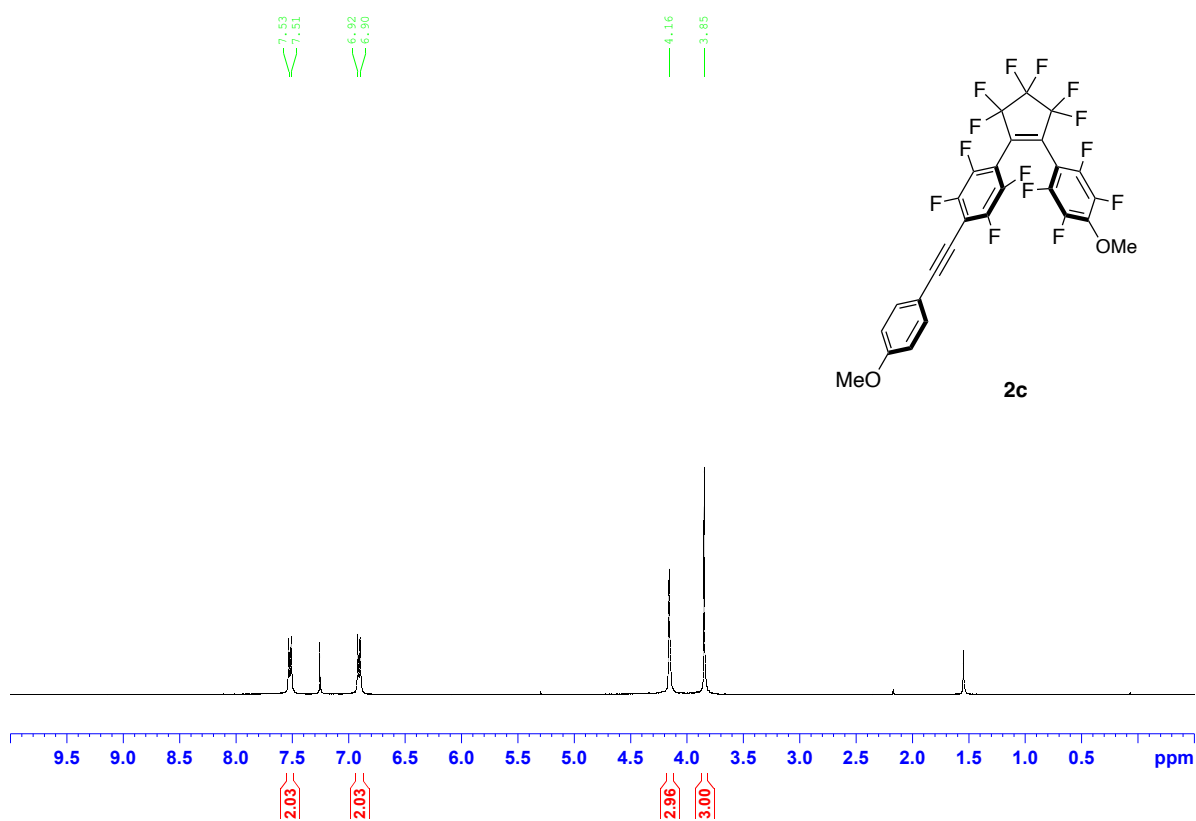

**Figure S26.** <sup>1</sup>H NMR spectrum of **2c** (CDCl<sub>3</sub>, 400 MHz)

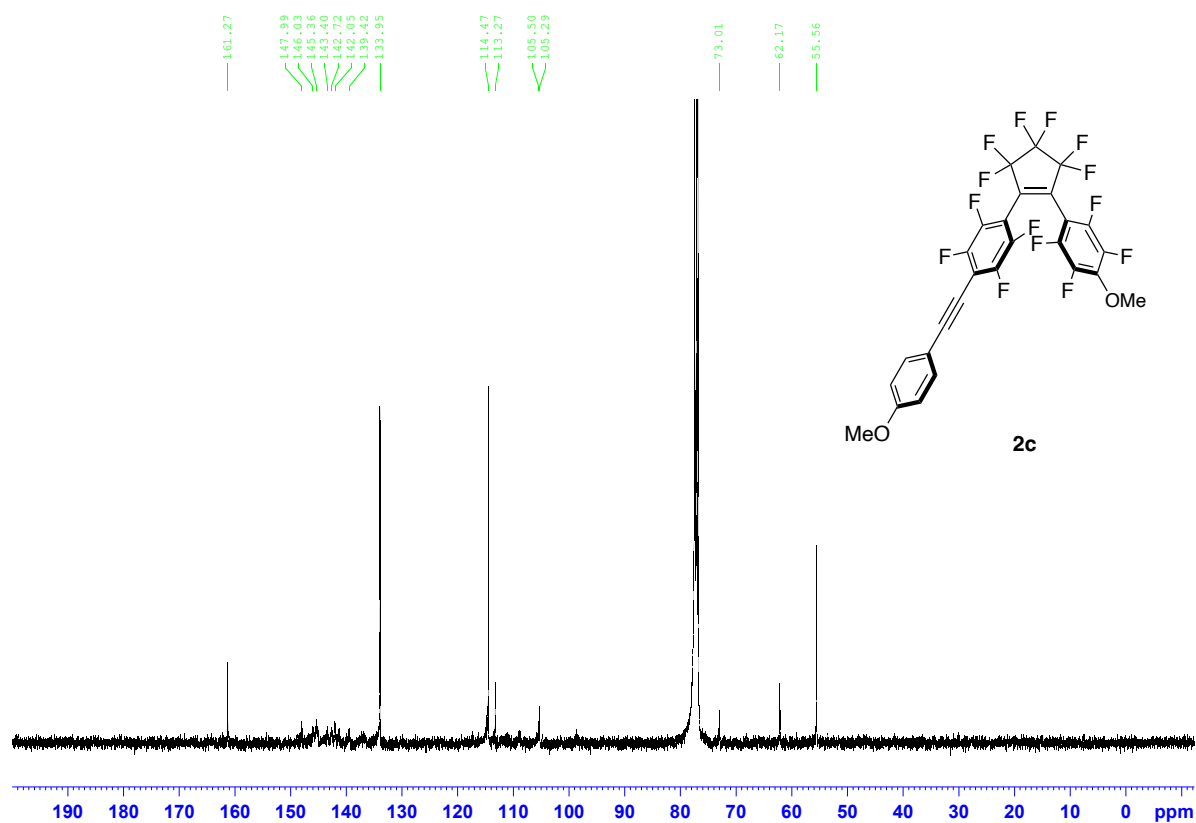

**Figure S27.** <sup>13</sup>C NMR spectrum of **2c** (CDCl<sub>3</sub>, 100 MHz)

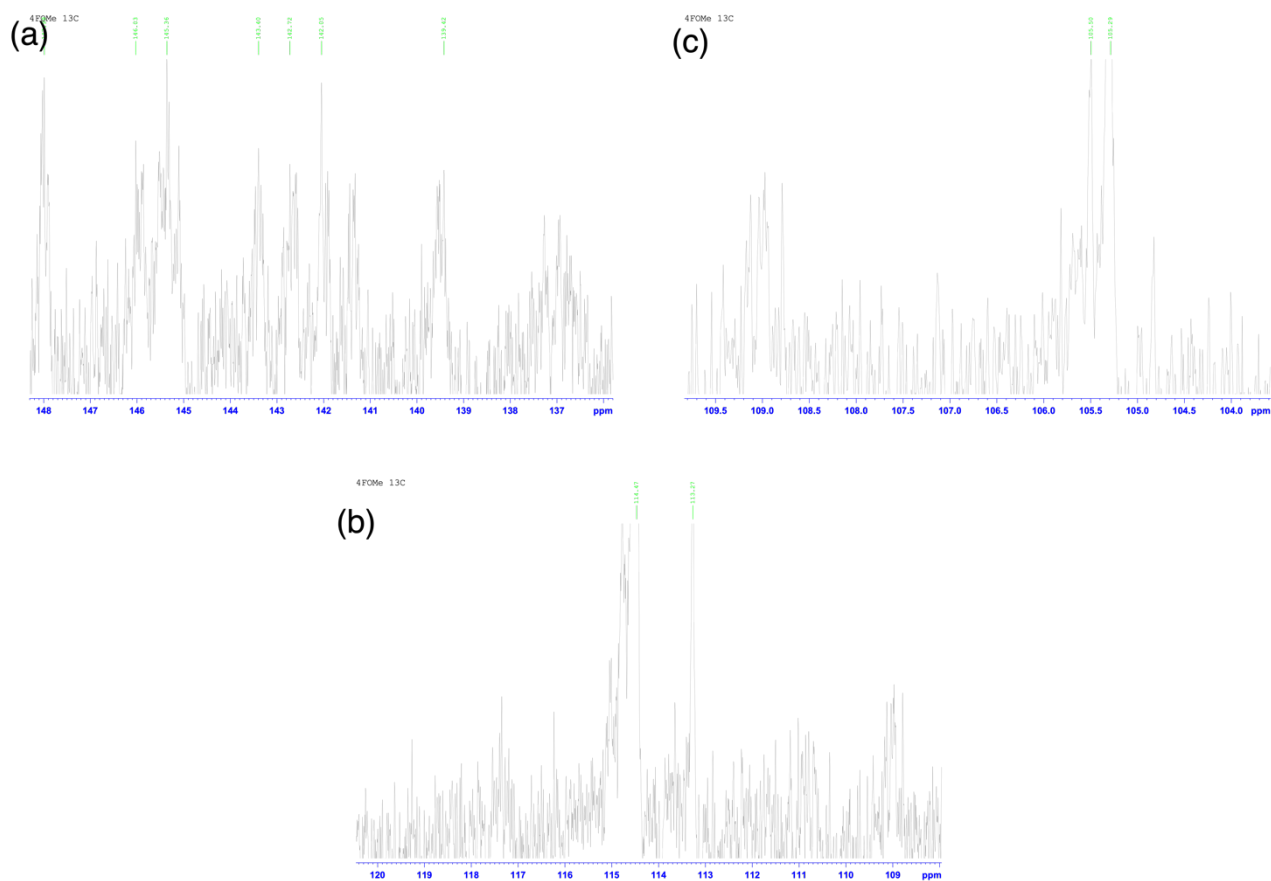

**Figure S28.** Expansion of  $^{13}\text{C}$  NMR spectrum of **2c**: (a) 148–136 ppm; (b) 120–108 ppm; (c) 110–103 ppm.

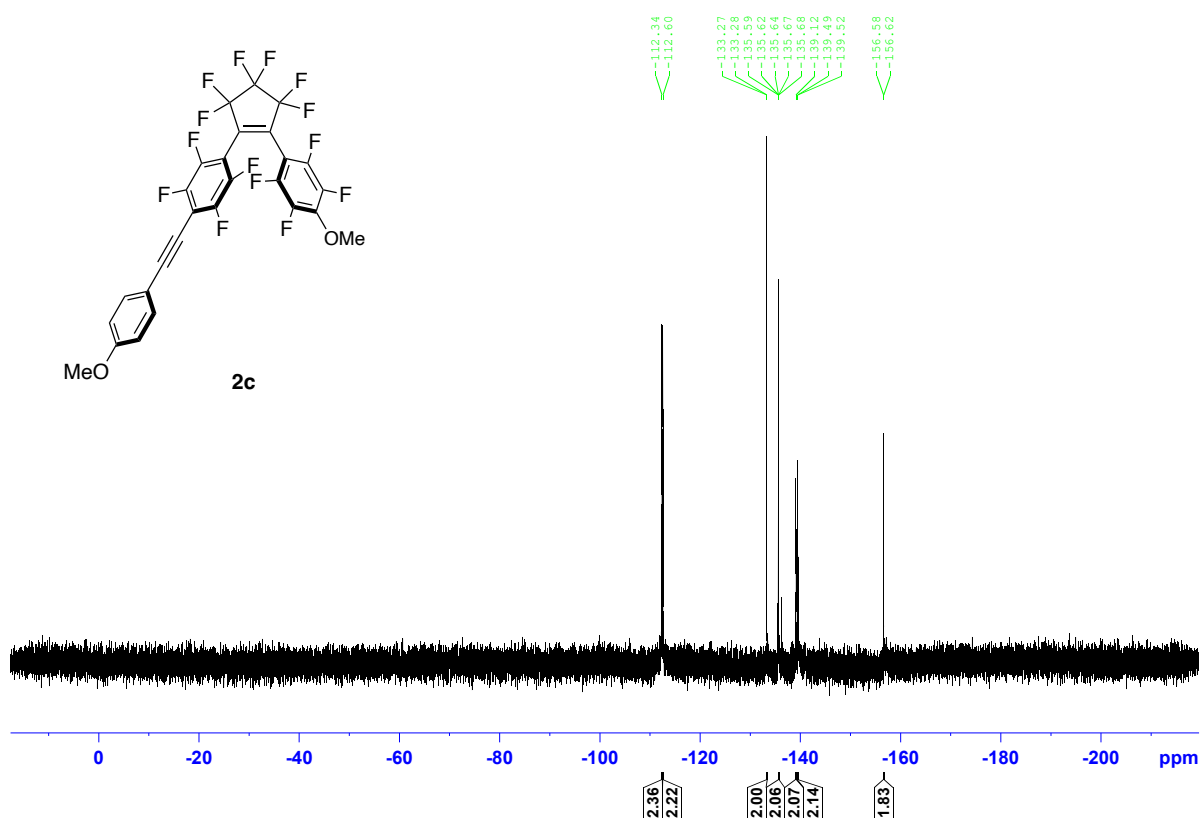

**Figure S29.**  $^{19}\text{F}$  NMR spectrum of **2c** ( $\text{CDCl}_3$ , 376 MHz)

### 3. DFT calculation

All computations were performed using the Gaussian 16 software package (Revision B.01). Geometry optimizations were carried out using the CAM-B3LYP hybrid functional and the 6-31G(d) basis set with an implicit solvation model (conductor-like polarizable continuum model; CPCM) for  $\text{CH}_2\text{Cl}_2$ . The vertical excitation energies and dipole moments of the optimized structures were calculated using the time-dependent self-consistent field approximation at the same level of theory.

#### 3.1. Optimized geometries

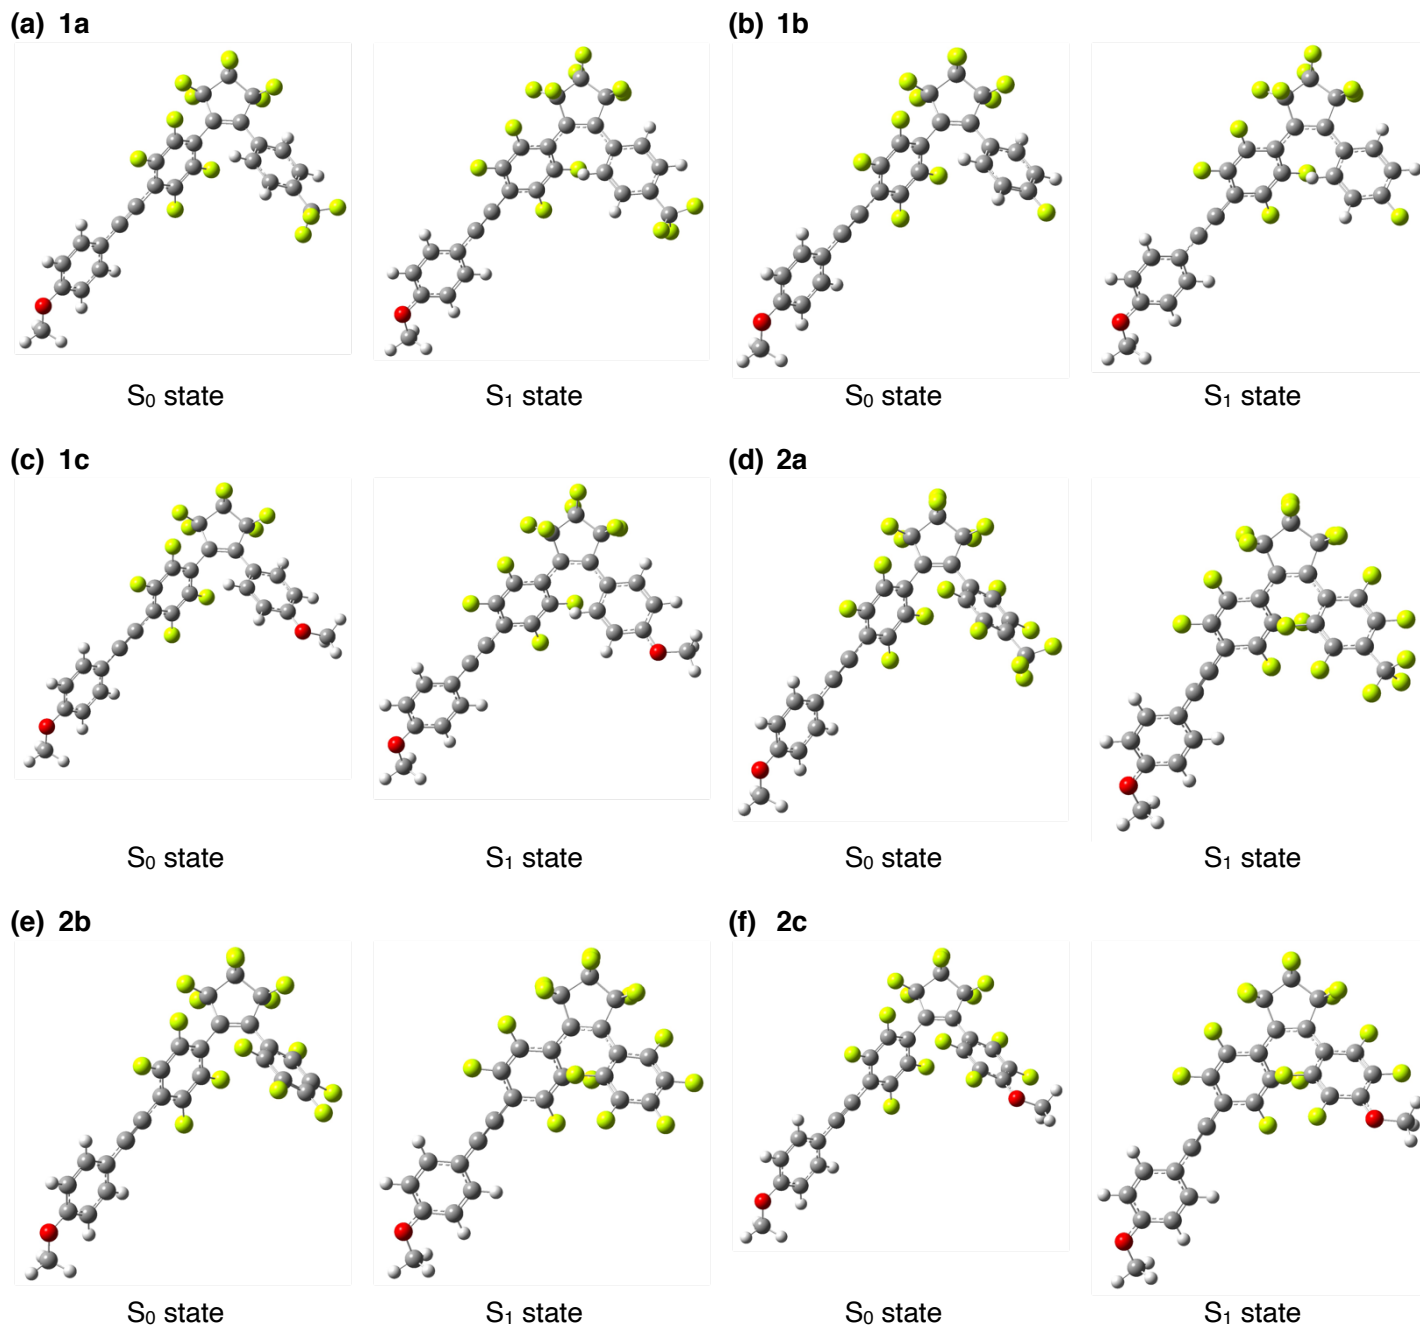

**Figure S30.** Optimized Geometry of **1a–c** and **2a–c** at both S<sub>0</sub> and S<sub>1</sub> states



### 3.2. HOMO and LUMO distributions

(a) 1a

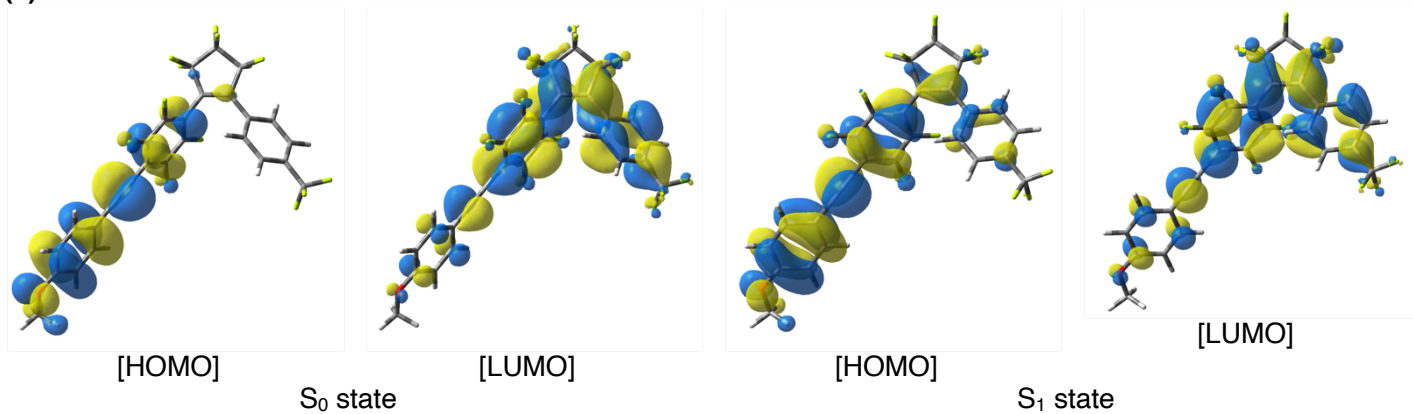

(b) 1b

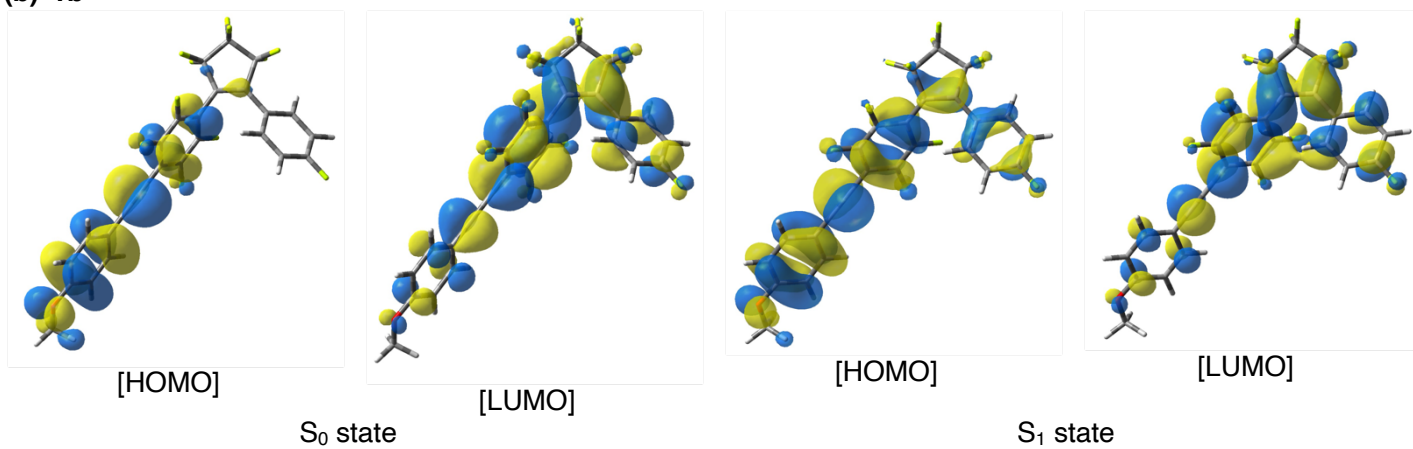

(c) 1c

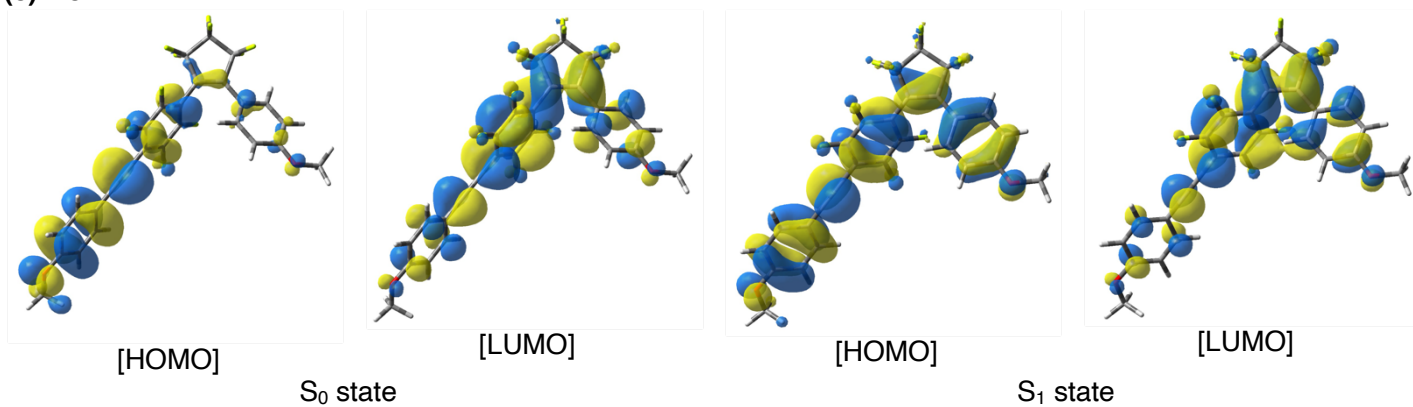

(d) 2a

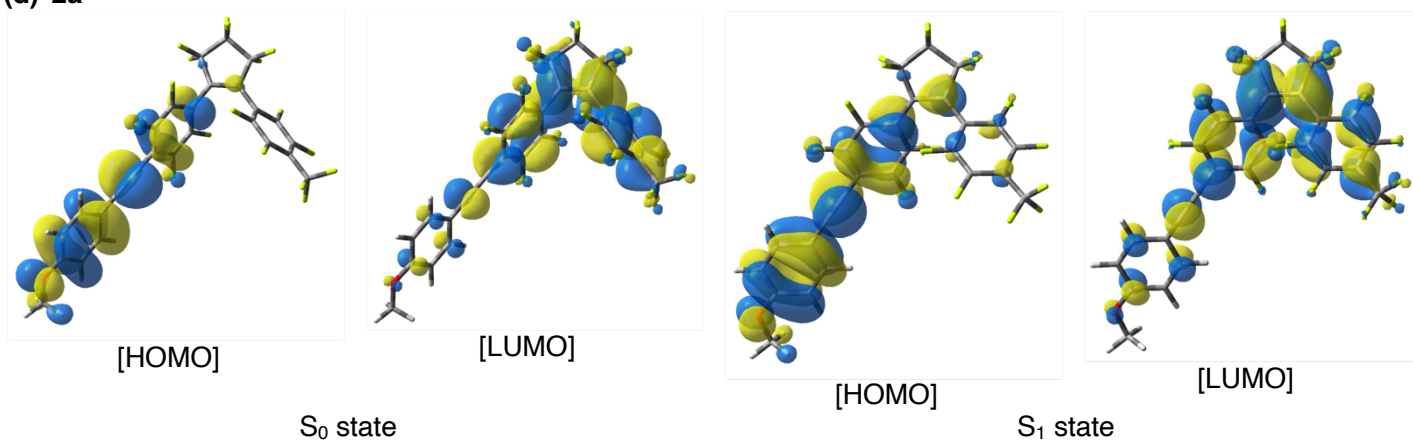

(e) 2b

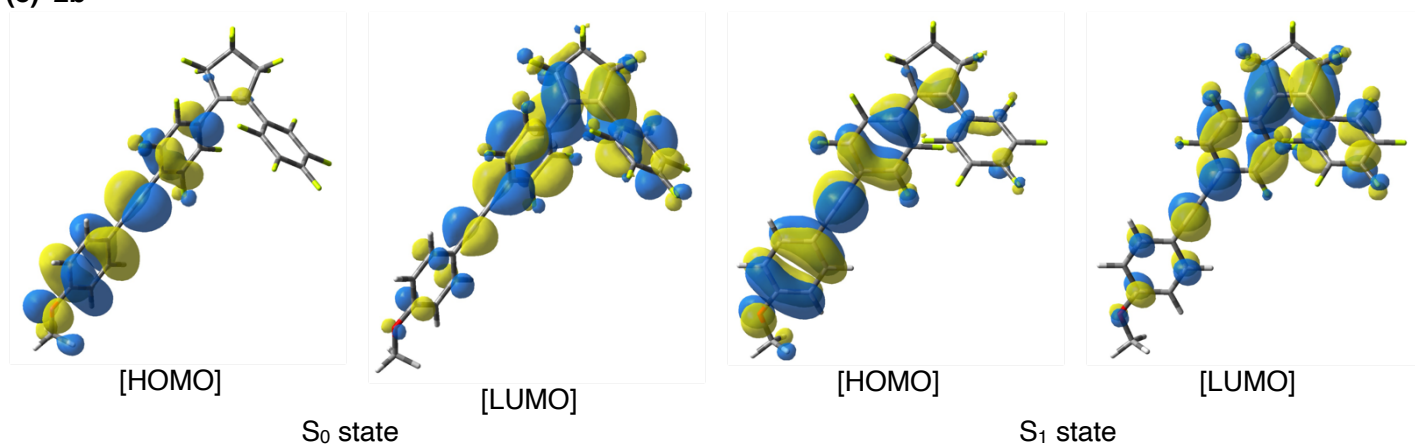

(f) 2c

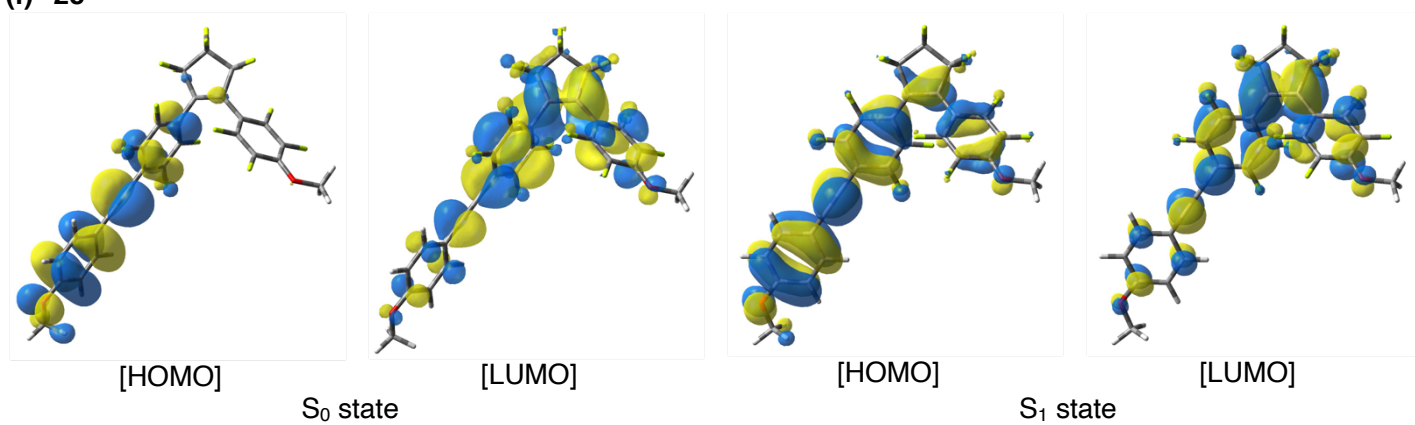

**Figure S31.** HOMO and LUMO diagrams of **1a–c** and **2a–c** at both  $S_0$  and  $S_1$  states

### 3.3. Structural and electronic parameters calculated by DFT calculation

**Table S1.** Structural and electronic parameters for **1a–c** and **2a–c** at both  $S_0$  and  $S_1$  states

| Compound  |       | Structural parameter  |                                                                                                                                        | Electronic parameter |                                                          |
|-----------|-------|-----------------------|----------------------------------------------------------------------------------------------------------------------------------------|----------------------|----------------------------------------------------------|
|           |       | C3...C4 distance (pm) | $\angle(\text{C}^1\text{-C}^2\text{-C}^3\text{-C}^4)^\circ$ / $\angle(\text{C}^3\text{-C}^4\text{-C}^5\text{-C}^6)^\circ$ <sup>2</sup> | Dipole moment (D)    | HOMO/ LUMO [ $\Delta E^{\text{H-L}}$ ] (eV) <sup>3</sup> |
| <b>1a</b> | $S_0$ | 134                   | 122/ –39                                                                                                                               | 7.0                  | –7.55/ –1.72 [5.84]                                      |
|           | $S_1$ | 141                   | 154/ –15                                                                                                                               | 10.3                 | –7.27/ –2.61 [4.66]                                      |
| <b>1b</b> | $S_0$ | 134                   | 121/ –37                                                                                                                               | 7.8                  | –7.54/ –1.57 [5.97]                                      |
|           | $S_1$ | 141                   | 155/ –14                                                                                                                               | 10.6                 | –7.23/ –2.47 [4.76]                                      |
| <b>1c</b> | $S_0$ | 134                   | 121/ –33                                                                                                                               | 9.4                  | –7.51/ –1.49 [6.02]                                      |
|           | $S_1$ | 142                   | 156/ –11                                                                                                                               | 11.6                 | –7.13/ –2.38 [4.75]                                      |
| <b>2a</b> | $S_0$ | 134                   | 121/ –52                                                                                                                               | 7.5                  | –7.58/ –1.97 [5.61]                                      |
|           | $S_1$ | 141                   | 160/ –25                                                                                                                               | 12.0                 | –7.34/ –2.90 [4.44]                                      |
| <b>2b</b> | $S_0$ | 134                   | 120/ –50                                                                                                                               | 7.8                  | –7.57/ –1.81 [5.76]                                      |
|           | $S_1$ | 140                   | 161/ –27                                                                                                                               | 11.8                 | –7.31/ –2.73 [4.58]                                      |
| <b>2c</b> | $S_0$ | 134                   | 120/ –46                                                                                                                               | 9.4                  | –7.55/ –1.71 [5.84]                                      |
|           | $S_1$ | 141                   | 161/ –25                                                                                                                               | 12.3                 | –7.26/ –2.63 [4.63]                                      |

<sup>1</sup> Calculated using Gaussian 16 with a density functional theory (DFT) method at the CAM-B3LYP/6-311++G(d,p)//CAM-B3LYP/6-31G(d) level of theory with the conductor-like polarizable continuum model (CPCM) for  $\text{CH}_2\text{Cl}_2$ . <sup>2</sup> Dihedral angle defined by indicated four atoms. <sup>3</sup> Orbital energy in eV unit of the highest occupied molecular orbital (HOMO) and the lowest unoccupied molecular orbital (LUMO).  $\Delta E^{\text{H-L}}$ : energy gap (unit: eV) between HOMO and LUMO.

**Table S2.** Energy (hartree) and dipole moment (debye) of **1a–c** and **2a–c** at both  $S_0$  and  $S_1$  state.

|           |       | E(RCAM-B3LYP) [hartree] | Dipole moment (debye)                          |
|-----------|-------|-------------------------|------------------------------------------------|
| <b>1a</b> | $S_0$ | –2408.41830173          | X= 6.3207/ Y= 2.7188/ Z= –1.0519/ Tot= 6.9606  |
|           | $S_1$ | –2407.66122973          | X= 8.3247/ Y= 3.4564/ Z= –0.9792/ Tot= 9.0667  |
| <b>1b</b> | $S_0$ | –2170.59514673          | X= –6.6007/ Y= 4.0802/ Z= 0.7062/ Tot= 7.7920  |
|           | $S_1$ | –2169.91532131          | X= –7.9425/ Y= 4.7701/ Z= 0.4845/ Tot= 9.2775  |
| <b>1c</b> | $S_0$ | –2185.85879664          | X= –4.9643/ Y= 7.9213/ Z= 1.3840/ Tot= 9.4502  |
|           | $S_1$ | –2185.18007558          | X= –4.9604/ Y= 8.7880/ Z= 0.8230/ Tot= 10.1248 |
| <b>2a</b> | $S_0$ | –2805.38177088          | X= 7.0162/ Y= 2.2724/ Z= –1.1911/ Tot= 7.4706  |
|           | $S_1$ | –2804.48646524          | X= 9.6987/ Y= 3.6557/ Z= –0.8706/ Tot= 10.4013 |
| <b>2b</b> | $S_0$ | –2567.55676876          | X= 7.0517/ Y= 3.2420/ Z= –1.0945/ Tot= 7.8381  |
|           | $S_1$ | –2566.73462626          | X= 9.2677/ Y= 4.4754/ Z= –0.5328/ Tot= 10.3055 |
| <b>2c</b> | $S_0$ | –2582.82444154          | X= 5.4518/ Y= 7.5100/ Z= –1.8313/ Tot= 9.4592  |
|           | $S_1$ | –2582.00394279          | X= 6.6352/ Y= 8.4987/ Z= –1.1274/ Tot= 10.8409 |

### 3.4. Theoretical transition in S<sub>0</sub> and S<sub>1</sub> states

**Table S3.** Theoretical transition calculated by TD-DFT calculation using an optimized geometry at the S<sub>0</sub> state.

|           |                            |                 |           |          |              |
|-----------|----------------------------|-----------------|-----------|----------|--------------|
| <b>1a</b> | Excited State 1: Singlet-A | 3.8133 eV       | 325.14 nm | f=1.3979 | <S**2>=0.000 |
|           | 146(HOMO-3) → 150(LUMO)    | 0.10178 (2.1%)  |           |          |              |
|           | 148(HOMO-1) → 150(LUMO)    | 0.14274 (4.1%)  |           |          |              |
|           | 149(HOMO) → 150(LUMO)      | 0.58343 (68%)   |           |          |              |
|           | 149(HOMO) → 151(LUMO+1)    | 0.31390 (20%)   |           |          |              |
|           | Excited State 3: Singlet-A | 4.6825 eV       | 264.78 nm | f=0.2435 | <S**2>=0.000 |
|           | 146(HOMO-3) → 150(LUMO)    | -0.29029 (17%)  |           |          |              |
|           | 147(HOMO-2) → 150(LUMO)    | 0.29870 (18%)   |           |          |              |
|           | 148(HOMO-1) → 150(LUMO)    | -0.13697 (3.7%) |           |          |              |
|           | 148(HOMO-1) → 151(LUMO+1)  | 0.15345 (4.7%)  |           |          |              |
| <b>1b</b> | Excited State 1: Singlet-A | 3.8467 eV       | 322.31 nm | f=1.4426 | <S**2>=0.000 |
|           | 136(HOMO-1) → 138(LUMO)    | 0.14253 (4.1%)  |           |          |              |
|           | 137(HOMO) → 138(LUMO)      | 0.60647 (74%)   |           |          |              |
|           | 137(HOMO) → 139(LUMO+1)    | 0.26308 (14%)   |           |          |              |
|           | Excited State 2: Singlet-A | 4.6124 eV       | 268.81 nm | f=0.2537 | <S**2>=0.000 |
|           | 135(HOMO-2) → 138(LUMO)    | -0.26809 (14%)  |           |          |              |
|           | 136(HOMO-1) → 138(LUMO)    | 0.50357 (51%)   |           |          |              |
|           | 136(HOMO-1) → 139(LUMO+1)  | -0.20689 (8.5%) |           |          |              |
|           | 137(HOMO) → 139(LUMO+1)    | -0.29406 (17%)  |           |          |              |
|           | Excited State 1: Singlet-A | 3.8264 eV       | 324.03 nm | f=1.4184 | <S**2>=0.000 |
| <b>1c</b> | Excited State 1: Singlet-A | 3.8264 eV       | 324.03 nm | f=1.4184 | <S**2>=0.000 |
|           | 136(HOMO-5) → 142(LUMO)    | 0.11213 (2.5%)  |           |          |              |
|           | 140(HOMO-1) → 142(LUMO)    | 0.17457 (6.1%)  |           |          |              |
|           | 140(HOMO-1) → 143(LUMO+1)  | 0.15552 (4.8%)  |           |          |              |
|           | 141(HOMO) → 142(LUMO)      | 0.60596 (73%)   |           |          |              |
|           | 141(HOMO) → 143(LUMO+1)    | -0.19819 (7.8%) |           |          |              |
|           | Excited State 2: Singlet-A | 4.2921 eV       | 288.87 nm | f=0.5598 | <S**2>=0.000 |
|           | 140(HOMO-1) → 142(LUMO)    | 0.58040 (67%)   |           |          |              |
|           | 140(HOMO-1) → 143(LUMO+1)  | 0.23336 (11%)   |           |          |              |
|           | 141(HOMO) → 142(LUMO)      | -0.12746 (3.2%) |           |          |              |
| <b>2a</b> | Excited State 1: Singlet-A | 3.7333 eV       | 332.11 nm | f=1.2878 | <S**2>=0.000 |
|           | 162(HOMO-3) → 166(LUMO)    | 0.17434 (6.1%)  |           |          |              |
|           | 165(HOMO) → 166(LUMO)      | 0.57560 (66%)   |           |          |              |
|           | 165(HOMO) → 167(LUMO+1)    | -0.32780 (21%)  |           |          |              |
|           | Excited State 3: Singlet-A | 4.5867 eV       | 270.31 nm | f=0.2049 | <S**2>=0.000 |
|           | 162(HOMO-3) → 166(LUMO)    | 0.21106 (8.9%)  |           |          |              |
|           | 163(HOMO-2) → 166(LUMO)    | 0.16729 (5.6%)  |           |          |              |
|           | 165(HOMO) → 166(LUMO)      | 0.27177 (15%)   |           |          |              |
|           | 165(HOMO) → 167(LUMO+1)    | 0.51129 (52%)   |           |          |              |
|           | 165(HOMO) → 168(LUMO+2)    | -0.17921 (6.4%) |           |          |              |
| <b>2b</b> | Excited State 1: Singlet-A | 3.7793 eV       | 328.06 nm | f=1.3585 | <S**2>=0.000 |
|           | 150(HOMO-3) → 154(LUMO)    | 0.17082 (5.8%)  |           |          |              |
|           | 153(HOMO) → 154(LUMO)      | 0.59637 (71%)   |           |          |              |
|           | 153(HOMO) → 155(LUMO+1)    | 0.29623 (18%)   |           |          |              |
|           | Excited State 3: Singlet-A | 4.7140 eV       | 263.01 nm | f=0.1637 | <S**2>=0.000 |
|           | 146(HOMO-7) → 154(LUMO)    | 0.11411 (2.6%)  |           |          |              |
|           | 150(HOMO-3) → 154(LUMO)    | -0.25971 (13%)  |           |          |              |
|           | 150(HOMO-3) → 155(LUMO+1)  | 0.12757 (3.2%)  |           |          |              |
|           | 153(HOMO) → 154(LUMO)      | -0.21708 (9.4%) |           |          |              |

|           |                  |                                |                                           |
|-----------|------------------|--------------------------------|-------------------------------------------|
|           |                  | <b>153(HOMO) → 155(LUMO+1)</b> | <b>0.54160 (59%)</b>                      |
|           |                  | 153(HOMO) → 158(LUMO+4)        | 0.11539 (2.7%)                            |
| <b>2c</b> | Excited State 1: | Singlet-A                      | 3.8023 eV 326.08 nm f=1.3920 <S**2>=0.000 |
|           |                  | 152(HOMO-5) → 158(LUMO)        | 0.14344 (4.1%)                            |
|           |                  | 156(HOMO-1) → 158(LUMO)        | 0.12845 (3.3%)                            |
|           |                  | <b>157(HOMO) → 158(LUMO)</b>   | <b>0.59485 (71%)</b>                      |
|           |                  | 157(HOMO) → 159(LUMO+1)        | 0.28613 (16%)                             |
|           | Excited State 2: | Singlet-A                      | 4.5257 eV 273.96 nm f=0.3773 <S**2>=0.000 |
|           |                  | 155(HOMO-2) → 158(LUMO)        | 0.19492 (7.6%)                            |
|           |                  | <b>156(HOMO-1) → 158(LUMO)</b> | <b>0.57108 (65%)</b>                      |
|           |                  | 156(HOMO-1) → 159(LUMO+1)      | -0.19904 (7.9%)                           |
|           |                  | 157(HOMO) → 159(LUMO+1)        | -0.23062 (11%)                            |

**Table S4.** Theoretical transition calculated by TD-DFT calculation using an optimized geometry at the S<sub>1</sub> state.

|           |                  |                                |                                           |
|-----------|------------------|--------------------------------|-------------------------------------------|
| <b>1a</b> | Excited State 1: | Singlet-A                      | 2.7230 eV 455.32 nm f=1.5977 <S**2>=0.000 |
|           |                  | 148(HOMO-1) → 150(LUMO)        | -0.19397 (7.5%)                           |
|           |                  | <b>149(HOMO) → 150(LUMO)</b>   | <b>0.65764 (86%)</b>                      |
|           |                  | 149(HOMO) → 151(LUMO+1)        | 0.11142 (2.5%)                            |
|           | Excited State 2: | Singlet-A                      | 3.8413 eV 322.77 nm f=0.4768 <S**2>=0.000 |
|           |                  | 144(HOMO-5) → 150(LUMO)        | -0.15806 (5.0%)                           |
|           |                  | <b>148(HOMO-1) → 150(LUMO)</b> | <b>-0.59365 (70%)</b>                     |
|           |                  | 149(HOMO) → 150(LUMO)          | -0.12064 (3.0%)                           |
|           |                  | 149(HOMO) → 151(LUMO+1)        | -0.27889 (16%)                            |
| <b>1b</b> | Excited State 1: | Singlet-A                      | 2.7505 eV 450.77 nm f=1.5727 <S**2>=0.000 |
|           |                  | 136(HOMO-1) → 138(LUMO)        | -0.18895 (7.1%)                           |
|           |                  | 136(HOMO-1) → 139(LUMO+1)      | 0.10982 (2.4%)                            |
|           |                  | <b>137(HOMO) → 138(LUMO)</b>   | <b>0.66023 (87%)</b>                      |
|           | Excited State 2: | Singlet-A                      | 3.7742 eV 328.51 nm f=0.5246 <S**2>=0.000 |
|           |                  | 133(HOMO-4) → 138(LUMO)        | 0.11896 (2.8%)                            |
|           |                  | <b>136(HOMO-1) → 138(LUMO)</b> | <b>-0.61741 (76%)</b>                     |
|           |                  | 137(HOMO) → 138(LUMO)          | -0.13590 (3.7%)                           |
|           |                  | 137(HOMO) → 139(LUMO+1)        | -0.24687 (12%)                            |
| <b>1c</b> | Excited State 1: | Singlet-A                      | 2.6596 eV 466.18 nm f=1.4049 <S**2>=0.000 |
|           |                  | 140(HOMO-1) → 142(LUMO)        | -0.17103 (5.8%)                           |
|           |                  | 140(HOMO-1) → 143(LUMO+1)      | 0.12119 (2.9%)                            |
|           |                  | <b>141(HOMO) → 142(LUMO)</b>   | <b>0.66705 (89%)</b>                      |
|           | Excited State 2: | Singlet-A                      | 3.6434 eV 340.30 nm f=0.7990 <S**2>=0.000 |
|           |                  | 138(HOMO-3) → 142(LUMO)        | 0.10636 (2.3%)                            |
|           |                  | <b>140(HOMO-1) → 142(LUMO)</b> | <b>-0.63003 (79%)</b>                     |
|           |                  | 141(HOMO) → 142(LUMO)          | -0.13545 (3.7%)                           |
|           |                  | 141(HOMO) → 143(LUMO+1)        | -0.21816 (9.5%)                           |
| <b>2a</b> | Excited State 1: | Singlet-A                      | 2.6076 eV 475.47 nm f=1.5172 <S**2>=0.000 |
|           |                  | 164(HOMO-1) → 166(LUMO)        | 0.18271 (6.7%)                            |
|           |                  | <b>165(HOMO) → 166(LUMO)</b>   | <b>0.66258 (88%)</b>                      |
|           |                  | 165(HOMO) → 167(LUMO+1)        | -0.11711 (2.7%)                           |
|           | Excited State 3: | Singlet-A                      | 3.9095 eV 317.14 nm f=0.3495 <S**2>=0.000 |
|           |                  | 160(HOMO-5) → 166(LUMO)        | 0.21057 (8.9%)                            |
|           |                  | 161(HOMO-4) → 166(LUMO)        | -0.11448 (2.6%)                           |
|           |                  | <b>164(HOMO-1) → 166(LUMO)</b> | <b>0.58174 (68%)</b>                      |
|           |                  | 165(HOMO) → 166(LUMO)          | -0.11452 (2.6%)                           |
|           |                  | 165(HOMO) → 167(LUMO+1)        | 0.24900 (12%)                             |

|           |                           |           |                 |           |          |              |
|-----------|---------------------------|-----------|-----------------|-----------|----------|--------------|
| <b>2b</b> | Excited State 1:          | Singlet-A | 2.7057 eV       | 458.23 nm | f=1.6807 | <S**2>=0.000 |
|           | 152(HOMO-1) → 154(LUMO)   |           | -0.17177 (5.9%) |           |          |              |
|           | 153(HOMO) → 154(LUMO)     |           | 0.66323 (88%)   |           |          |              |
|           | 153(HOMO) → 155(LUMO+1)   |           | 0.11672 (2.7%)  |           |          |              |
|           | Excited State 2:          | Singlet-A | 3.8939 eV       | 318.40 nm | f=0.4454 | <S**2>=0.000 |
|           | 148(HOMO-5) → 154(LUMO)   |           | 0.14371 (4.1%)  |           |          |              |
|           | 151(HOMO-2) → 154(LUMO)   |           | -0.17986 (6.5%) |           |          |              |
|           | 152(HOMO-1) → 154(LUMO)   |           | 0.59705 (71%)   |           |          |              |
|           | 153(HOMO) → 154(LUMO)     |           | 0.10115 (2.0%)  |           |          |              |
|           | 153(HOMO) → 155(LUMO+1)   |           | 0.22922 (10%)   |           |          |              |
| <b>2c</b> | Excited State 1:          | Singlet-A | 2.6955 eV       | 459.97 nm | f=1.6434 | <S**2>=0.000 |
|           | 156(HOMO-1) → 158(LUMO)   |           | -0.17225 (5.9%) |           |          |              |
|           | 156(HOMO-1) → 159(LUMO+1) |           | 0.10587 (2.2%)  |           |          |              |
|           | 157(HOMO) → 158(LUMO)     |           | 0.66210 (88%)   |           |          |              |
|           | Excited State 2:          | Singlet-A | 3.6882 eV       | 336.16 nm | f=0.5965 | <S**2>=0.000 |
|           | 150(HOMO-7) → 158(LUMO)   |           | 0.10320 (2.1%)  |           |          |              |
|           | 156(HOMO-1) → 158(LUMO)   |           | 0.63786 (81%)   |           |          |              |
|           | 157(HOMO) → 158(LUMO)     |           | 0.12991 (3.4%)  |           |          |              |
|           | 157(HOMO) → 159(LUMO+1)   |           | 0.19938 (7.9%)  |           |          |              |

### 3.5. Cartesian coordinate

**Table S5.** Cartesian coordinate for **1a** at the optimized geometry in S<sub>0</sub> state.

| No. | Atom | Type | Coordinates (Angstroms) |           |           |    |   |   |           |           |           |
|-----|------|------|-------------------------|-----------|-----------|----|---|---|-----------|-----------|-----------|
|     | No.  |      | x                       | y         | z         |    |   |   |           |           |           |
| 1   | 9    | 0    | -0.954188               | -0.062479 | -2.005000 | 26 | 6 | 0 | -4.061714 | 1.637535  | -0.720650 |
| 2   | 9    | 0    | -0.601207               | -2.440175 | 2.055289  | 27 | 6 | 0 | -0.054590 | -1.779233 | 1.033153  |
| 3   | 6    | 0    | -2.300382               | 2.787906  | 1.102255  | 28 | 6 | 0 | 3.344636  | -0.628359 | 0.034379  |
| 4   | 9    | 0    | 1.679238                | 0.345509  | -1.994743 | 29 | 6 | 0 | 7.937790  | 0.710926  | -0.971876 |
| 5   | 6    | 0    | 1.943896                | -0.847846 | 0.025380  | 30 | 1 | 0 | 8.387440  | 1.271341  | -1.781432 |
| 6   | 6    | 0    | -3.999910               | 3.016835  | -0.596078 | 31 | 6 | 0 | 6.566603  | 0.494318  | -0.974584 |
| 7   | 6    | 0    | -2.311306               | -1.543800 | -0.044343 | 32 | 1 | 0 | 5.965378  | 0.888937  | -1.786593 |
| 8   | 6    | 0    | -0.231534               | -0.565487 | -1.002090 | 33 | 6 | 0 | 4.538842  | -0.442353 | 0.041511  |
| 9   | 6    | 0    | -3.116923               | 3.590421  | 0.312344  | 34 | 6 | 0 | 1.311367  | -1.565389 | 1.042664  |
| 10  | 6    | 0    | 5.947417                | -0.224644 | 0.052554  | 35 | 6 | 0 | 1.133244  | -0.349750 | -0.997183 |
| 11  | 6    | 0    | -0.860594               | -1.287745 | 0.009661  | 36 | 6 | 0 | 8.713832  | 0.203938  | 0.072262  |
| 12  | 6    | 0    | -3.305527               | -0.642910 | -0.081187 | 37 | 6 | 0 | 6.741180  | -0.729220 | 1.096868  |
| 13  | 6    | 0    | -3.232341               | 0.820841  | 0.054802  | 38 | 1 | 0 | 6.274379  | -1.288862 | 1.900179  |
| 14  | 9    | 0    | 2.030455                | -2.051331 | 2.054292  | 39 | 6 | 0 | -4.349911 | -2.821686 | -0.069027 |
| 15  | 8    | 0    | 10.053342               | 0.356564  | 0.173257  | 40 | 6 | 0 | -4.631160 | -1.324984 | -0.305791 |
| 16  | 6    | 0    | -2.359123               | 1.408860  | 0.974357  | 41 | 9 | 0 | -4.679956 | -3.143316 | 1.196032  |
| 17  | 6    | 0    | 8.104223                | -0.517753 | 1.106083  | 42 | 9 | 0 | -5.597610 | -0.869667 | 0.516787  |
| 18  | 1    | 0    | 8.725913                | -0.902543 | 1.906931  | 43 | 9 | 0 | -5.030003 | -3.608690 | -0.914959 |
| 19  | 6    | 0    | 10.729911               | 1.079265  | -0.843574 | 44 | 9 | 0 | -5.069272 | -1.148917 | -1.581703 |
| 20  | 1    | 0    | 10.613355               | 0.595668  | -1.819047 | 45 | 1 | 0 | -1.739986 | 0.786655  | 1.609845  |
| 21  | 1    | 0    | 11.782381               | 1.077802  | -0.562180 | 46 | 1 | 0 | -1.629750 | 3.237776  | 1.825127  |
| 22  | 1    | 0    | 10.370516               | 2.111900  | -0.902912 | 47 | 1 | 0 | -4.643543 | 3.644984  | -1.200903 |
| 23  | 9    | 0    | -2.303463               | -3.844668 | 0.610631  | 48 | 1 | 0 | -4.751302 | 1.194346  | -1.428732 |
| 24  | 9    | 0    | -2.547469               | -3.381703 | -1.502486 | 49 | 6 | 0 | -3.012825 | 5.083308  | 0.410786  |
| 25  | 6    | 0    | -2.825400               | -2.944480 | -0.248144 | 50 | 9 | 0 | -4.173594 | 5.687963  | 0.107865  |
|     |      |      |                         |           |           | 51 | 9 | 0 | -2.659846 | 5.480287  | 1.644916  |
|     |      |      |                         |           |           | 52 | 9 | 0 | -2.086385 | 5.572569  | -0.435090 |

**Table S6.** Cartesian coordinate for **1a** at the optimized geometry in S<sub>1</sub> state.

| No. | Atom | Type | Coordinates (Angstroms) |           |           |    |   |   |           |           |           |
|-----|------|------|-------------------------|-----------|-----------|----|---|---|-----------|-----------|-----------|
|     | No.  |      | x                       | y         | z         |    |   |   |           |           |           |
| 1   | 9    | 0    | -0.937988               | 0.390936  | -1.612509 | 26 | 6 | 0 | -4.349991 | 1.504424  | -0.58579  |
| 2   | 9    | 0    | -0.32511                | -3.027245 | 1.643548  | 27 | 6 | 0 | 0.148774  | -2.087534 | 0.819951  |
| 3   | 6    | 0    | -2.408899               | 2.795863  | 0.935623  | 28 | 6 | 0 | 3.425851  | -0.578718 | 0.021404  |
| 4   | 9    | 0    | 1.664109                | 0.86845   | -1.584007 | 29 | 6 | 0 | 7.891291  | 1.197261  | -0.789677 |
| 5   | 6    | 0    | 2.074272                | -0.824966 | 0.019466  | 30 | 1 | 0 | 8.277449  | 2.000696  | -1.403082 |
| 6   | 6    | 0    | -4.424271               | 2.868555  | -0.389237 | 31 | 6 | 0 | 6.539802  | 0.939291  | -0.779412 |
| 7   | 6    | 0    | -2.167768               | -1.562586 | 0.050041  | 32 | 1 | 0 | 5.86965   | 1.539608  | -1.384216 |
| 8   | 6    | 0    | -0.172425               | -0.303013 | -0.765216 | 33 | 6 | 0 | 4.636794  | -0.357818 | 0.018296  |
| 9   | 6    | 0    | -3.451752               | 3.525132  | 0.366002  | 34 | 6 | 0 | 1.487838  | -1.854435 | 0.814469  |
| 10  | 6    | 0    | 6.00026                 | -0.105628 | 0.014114  | 35 | 6 | 0 | 1.166557  | -0.066524 | -0.774168 |
| 11  | 6    | 0    | -0.776655               | -1.31501  | 0.048824  | 36 | 6 | 0 | 8.753414  | 0.412781  | -0.002407 |
| 12  | 6    | 0    | -3.230877               | -0.682557 | -0.216829 | 37 | 6 | 0 | 6.889988  | -0.88676  | 0.803948  |
| 13  | 6    | 0    | -3.288215               | 0.743877  | -0.040188 | 38 | 1 | 0 | 6.48906   | -1.687717 | 1.414497  |
| 14  | 9    | 0    | 2.28618                 | -2.579468 | 1.597776  | 39 | 6 | 0 | -4.050501 | -2.934761 | -0.510515 |
| 15  | 8    | 0    | 10.076342               | 0.578961  | 0.058672  | 40 | 6 | 0 | -4.472936 | -1.455985 | -0.528667 |
| 16  | 6    | 0    | -2.328802               | 1.431647  | 0.739917  | 41 | 9 | 0 | -4.980308 | -3.725316 | 0.051469  |
| 17  | 6    | 0    | 8.23452                 | -0.630517 | 0.792817  | 42 | 9 | 0 | -5.465793 | -1.253482 | 0.382539  |
| 18  | 1    | 0    | 8.926411                | -1.215566 | 1.387752  | 43 | 9 | 0 | -3.827691 | -3.361775 | -1.771177 |
| 19  | 6    | 0    | 10.689549               | 1.609879  | -0.712395 | 44 | 9 | 0 | -5.020791 | -1.153847 | -1.744701 |
| 20  | 1    | 0    | 10.520224               | 1.449382  | -1.780813 | 45 | 1 | 0 | -1.537378 | 0.877116  | 1.22898   |
| 21  | 1    | 0    | 11.754161               | 1.544986  | -0.49542  | 46 | 1 | 0 | -1.669348 | 3.297551  | 1.549725  |
| 22  | 1    | 0    | 10.312063               | 2.592875  | -0.417311 | 47 | 1 | 0 | -5.243805 | 3.43112   | -0.82242  |
| 23  | 9    | 0    | -2.994176               | -3.218043 | 1.570113  | 48 | 1 | 0 | -5.108368 | 1.01568   | -1.182621 |
| 24  | 9    | 0    | -1.923098               | -3.938828 | -0.194846 | 49 | 6 | 0 | -3.504684 | 5.01045   | 0.526993  |
| 25  | 6    | 0    | -2.721233               | -2.947376 | 0.263422  | 50 | 9 | 0 | -4.766913 | 5.474784  | 0.509519  |
|     |      |      |                         |           |           | 51 | 9 | 0 | -2.943217 | 5.413423  | 1.681008  |
|     |      |      |                         |           |           | 52 | 9 | 0 | -2.847454 | 5.649606  | -0.463083 |



**Table S7.** Cartesian coordinate for **1b** at the optimized geometry in S<sub>0</sub> state.

| No. | Atom | Type | Coordinates (Angstroms) |           |           |    |   |   |           |           |           |
|-----|------|------|-------------------------|-----------|-----------|----|---|---|-----------|-----------|-----------|
|     | No.  |      | x                       | y         | z         |    |   |   |           |           |           |
| 1   | 9    | 0    | 1.16958                 | 0.651886  | 1.942677  | 25 | 6 | 0 | 3.27194   | -2.152988 | 0.362441  |
| 2   | 9    | 0    | 1.014936                | -1.982555 | -1.968381 | 26 | 6 | 0 | 4.172273  | 2.536681  | 0.43066   |
| 3   | 6    | 0    | 2.251186                | 3.401602  | -1.396628 | 27 | 6 | 0 | 0.415115  | -1.30962  | -0.984252 |
| 4   | 9    | 0    | -1.489001               | 0.834157  | 1.925258  | 28 | 6 | 0 | -3.06848  | -0.39263  | -0.03348  |
| 5   | 6    | 0    | -1.654014               | -0.493081 | -0.020639 | 29 | 6 | 0 | -7.752688 | 0.614687  | 0.937144  |
| 6   | 6    | 0    | 4.007994                | 3.894123  | 0.202054  | 30 | 1 | 0 | -8.243663 | 1.177789  | 1.720367  |
| 7   | 6    | 0    | 2.645668                | -0.819383 | 0.060939  | 31 | 6 | 0 | -6.368264 | 0.512035  | 0.939529  |
| 8   | 6    | 0    | 0.491114                | 0.031438  | 0.975283  | 32 | 1 | 0 | -5.798372 | 0.996713  | 1.724945  |
| 9   | 6    | 0    | 3.046562                | 4.301753  | -0.707291 | 33 | 6 | 0 | -4.273985 | -0.306692 | -0.042413 |
| 10  | 6    | 0    | -5.695879               | -0.206371 | -0.053973 | 34 | 6 | 0 | -0.964224 | -1.213224 | -0.998002 |
| 11  | 6    | 0    | 1.178011                | -0.691598 | 0.002723  | 35 | 6 | 0 | -0.887089 | 0.130381  | 0.966268  |
| 12  | 6    | 0    | 3.561304                | 0.162686  | 0.017303  | 36 | 6 | 0 | -8.488455 | -0.008403 | -0.072687 |
| 13  | 6    | 0    | 3.374199                | 1.597687  | -0.234801 | 37 | 6 | 0 | -6.449518 | -0.828266 | -1.064137 |
| 14  | 9    | 0    | -1.641041               | -1.817559 | -1.97467  | 38 | 1 | 0 | -5.941502 | -1.388989 | -1.841275 |
| 15  | 8    | 0    | -9.836545               | 0.027682  | -0.170035 | 39 | 6 | 0 | 4.780734  | -1.920572 | 0.164751  |
| 16  | 6    | 0    | 2.420937                | 2.046913  | -1.155671 | 40 | 6 | 0 | 4.938258  | -0.392252 | 0.283315  |
| 17  | 6    | 0    | -7.825457               | -0.730316 | -1.072899 | 41 | 9 | 0 | 5.137268  | -2.311595 | -1.073591 |
| 18  | 1    | 0    | -8.416503               | -1.206368 | -1.847478 | 42 | 9 | 0 | 5.865073  | 0.073812  | -0.578548 |
| 19  | 6    | 0    | -10.566662              | 0.740354  | 0.816335  | 43 | 9 | 0 | 5.523666  | -2.581735 | 1.064527  |
| 20  | 1    | 0    | -10.404845              | 0.31706   | 1.813165  | 44 | 9 | 0 | 5.362921  | -0.083489 | 1.538861  |
| 21  | 1    | 0    | -11.61664               | 0.636496  | 0.544954  | 45 | 1 | 0 | 1.82096   | 1.332893  | -1.707677 |
| 22  | 1    | 0    | -10.295655              | 1.801277  | 0.822077  | 46 | 1 | 0 | 1.522572  | 3.763443  | -2.112559 |
| 23  | 9    | 0    | 2.824607                | -3.15372  | -0.426052 | 47 | 1 | 0 | 4.612084  | 4.632512  | 0.716077  |
| 24  | 9    | 0    | 3.031847                | -2.522851 | 1.646871  | 48 | 1 | 0 | 4.91951   | 2.205665  | 1.141774  |
|     |      |      |                         |           |           | 49 | 9 | 0 | 2.885804  | 5.613695  | -0.935322 |

**Table S8.** Cartesian coordinate for **1b** at the optimized geometry in S<sub>1</sub> state.

| No. | Atom | Type | Coordinates (Angstroms) |           |           |    |   |   |           |           |           |
|-----|------|------|-------------------------|-----------|-----------|----|---|---|-----------|-----------|-----------|
|     | No.  |      | x                       | y         | z         |    |   |   |           |           |           |
| 1   | 9    | 0    | 1.16329                 | 1.1456    | 1.458817  | 25 | 6 | 0 | 3.253222  | -2.157112 | -0.155402 |
| 2   | 9    | 0    | 0.863127                | -2.592303 | -1.47775  | 26 | 6 | 0 | 4.459422  | 2.482619  | 0.280091  |
| 3   | 6    | 0    | 2.377453                | 3.445456  | -1.313295 | 27 | 6 | 0 | 0.306773  | -1.634047 | -0.72922  |
| 4   | 9    | 0    | -1.471102               | 1.364353  | 1.428761  | 28 | 6 | 0 | -3.098789 | -0.384689 | -0.013606 |
| 5   | 6    | 0    | -1.727107               | -0.496509 | -0.012889 | 29 | 6 | 0 | -7.724377 | 0.985128  | 0.710588  |
| 6   | 6    | 0    | 4.40797                 | 3.825109  | -0.034952 | 30 | 1 | 0 | -8.188114 | 1.794685  | 1.258967  |
| 7   | 6    | 0    | 2.566657                | -0.821021 | -0.04985  | 31 | 6 | 0 | -6.35134  | 0.869197  | 0.701685  |
| 8   | 6    | 0    | 0.464513                | 0.309261  | 0.683496  | 32 | 1 | 0 | -5.745382 | 1.587444  | 1.242514  |
| 9   | 6    | 0    | 3.362851                | 4.290908  | -0.823248 | 33 | 6 | 0 | -4.324083 | -0.287397 | -0.009356 |
| 10  | 6    | 0    | -5.710571               | -0.1771   | -0.005273 | 34 | 6 | 0 | -1.048263 | -1.530481 | -0.722686 |
| 11  | 6    | 0    | 1.160994                | -0.710291 | -0.044772 | 35 | 6 | 0 | -0.891523 | 0.412994  | 0.694171  |
| 12  | 6    | 0    | 3.544438                | 0.178847  | 0.129365  | 36 | 6 | 0 | -8.504085 | 0.05121   | 0.008405  |
| 13  | 6    | 0    | 3.465494                | 1.579399  | -0.175448 | 37 | 6 | 0 | -6.517743 | -1.111003 | -0.709364 |
| 14  | 9    | 0    | -1.777754               | -2.39683  | -1.427763 | 38 | 1 | 0 | -6.039701 | -1.916812 | -1.254807 |
| 15  | 8    | 0    | -9.841065               | 0.073563  | -0.04678  | 39 | 6 | 0 | 4.575422  | -1.951255 | 0.60368   |
| 16  | 6    | 0    | 2.432896                | 2.103601  | -0.992939 | 40 | 6 | 0 | 4.854375  | -0.443156 | 0.493422  |
| 17  | 6    | 0    | -7.883395               | -0.996399 | -0.700142 | 41 | 9 | 0 | 5.57692   | -2.69462  | 0.103336  |
| 18  | 1    | 0    | -8.512286               | -1.701119 | -1.232218 | 42 | 9 | 0 | 5.822461  | -0.225307 | -0.441668 |
| 19  | 6    | 0    | -10.548249              | 1.101828  | 0.63993   | 43 | 9 | 0 | 4.39498   | -2.289103 | 1.89798   |
| 20  | 1    | 0    | -10.354633              | 1.057866  | 1.715645  | 44 | 9 | 0 | 5.375075  | 0.012746  | 1.673744  |
| 21  | 1    | 0    | -11.603183              | 0.911902  | 0.449662  | 45 | 1 | 0 | 1.689291  | 1.435908  | -1.409978 |
| 22  | 1    | 0    | -10.276196              | 2.088139  | 0.252929  | 46 | 1 | 0 | 1.593974  | 3.84433   | -1.947535 |
| 23  | 9    | 0    | 3.551134                | -2.508067 | -1.437781 | 47 | 1 | 0 | 5.160023  | 4.518939  | 0.323066  |
| 24  | 9    | 0    | 2.559067                | -3.182063 | 0.390827  | 48 | 1 | 0 | 5.264804  | 2.120868  | 0.905352  |
|     |      |      |                         |           |           | 49 | 9 | 0 | 3.311935  | 5.594348  | -1.128913 |

**Table S9.** Cartesian coordinate for **1c** at the optimized geometry in S<sub>0</sub> state.

| No. | Atom No. | Type | Coordinates (Angstroms) |           |           |    |   |   |           |           |           |
|-----|----------|------|-------------------------|-----------|-----------|----|---|---|-----------|-----------|-----------|
|     |          |      | x                       | y         | z         |    |   |   |           |           |           |
| 1   | 9        | 0    | 1.069697                | 0.362726  | 1.972342  | 27 | 6 | 0 | 0.24313   | -1.48956  | -1.005416 |
| 2   | 9        | 0    | 0.816337                | -2.161946 | -2.005892 | 28 | 6 | 0 | -3.202711 | -0.456192 | -0.035696 |
| 3   | 6        | 0    | 2.263726                | 3.159041  | -1.262313 | 29 | 6 | 0 | -7.845294 | 0.71551   | 0.952143  |
| 4   | 9        | 0    | -1.578758               | 0.653649  | 1.956308  | 30 | 1 | 0 | -8.315837 | 1.273535  | 1.751398  |
| 5   | 6        | 0    | -1.79343                | -0.615038 | -0.023519 | 31 | 6 | 0 | -6.466457 | 0.553892  | 0.956332  |
| 6   | 6        | 0    | 4.133325                | 3.523514  | 0.224475  | 32 | 1 | 0 | -5.880513 | 0.988444  | 1.75908   |
| 7   | 6        | 0    | 2.490198                | -1.118258 | 0.053351  | 33 | 6 | 0 | -4.40359  | -0.320287 | -0.044735 |
| 8   | 6        | 0    | 0.369282                | -0.204663 | 0.988029  | 34 | 6 | 0 | -1.131287 | -1.337397 | -1.018028 |
| 9   | 6        | 0    | 3.147233                | 4.035026  | -0.620205 | 35 | 6 | 0 | -1.003671 | -0.049104 | 0.979881  |
| 10  | 6        | 0    | -5.820108               | -0.160128 | -0.05736  | 36 | 6 | 0 | -8.601754 | 0.157352  | -0.080073 |
| 11  | 6        | 0    | 1.029015                | -0.928614 | -0.002519 | 37 | 6 | 0 | -6.594502 | -0.716812 | -1.089592 |
| 12  | 6        | 0    | 3.449167                | -0.174596 | 0.030012  | 38 | 1 | 0 | -6.106841 | -1.27339  | -1.882588 |
| 13  | 6        | 0    | 3.335302                | 1.268053  | -0.196251 | 39 | 6 | 0 | 4.570265  | -2.316784 | 0.140568  |
| 14  | 9        | 0    | -1.830166               | -1.889198 | -2.010462 | 40 | 6 | 0 | 4.797263  | -0.800673 | 0.291365  |
| 15  | 8        | 0    | -9.946641               | 0.254673  | -0.181577 | 41 | 9 | 0 | 4.912455  | -2.698223 | -1.105232 |
| 16  | 6        | 0    | 2.357543                | 1.799077  | -1.051942 | 42 | 9 | 0 | 5.752786  | -0.364105 | -0.555358 |
| 17  | 6        | 0    | -7.96501                | -0.560033 | -1.100332 | 43 | 9 | 0 | 5.280713  | -3.030517 | 1.027057  |
| 18  | 1        | 0    | -8.571736               | -0.985316 | -1.892141 | 44 | 9 | 0 | 5.229277  | -0.538653 | 1.555367  |
| 19  | 6        | 0    | -10.650138              | 0.969431  | 0.822379  | 45 | 8 | 0 | 2.972276  | 5.347329  | -0.886321 |
| 20  | 1        | 0    | -10.513541              | 0.509745  | 1.806793  | 46 | 6 | 0 | 3.843429  | 6.284497  | -0.271058 |
| 21  | 1        | 0    | -11.702062              | 0.920951  | 0.543063  | 47 | 1 | 0 | 3.523924  | 7.264966  | -0.622227 |
| 22  | 1        | 0    | -10.331992              | 2.016502  | 0.861414  | 48 | 1 | 0 | 3.762289  | 6.24413   | 0.820035  |
| 23  | 9        | 0    | 2.562797                | -3.448733 | -0.478235 | 49 | 1 | 0 | 4.883389  | 6.112639  | -0.567082 |
| 24  | 9        | 0    | 2.79248                 | -2.870192 | 1.606882  | 50 | 1 | 0 | 1.679542  | 1.136872  | -1.577917 |
| 25  | 6        | 0    | 3.052774                | -2.483022 | 0.330234  | 51 | 1 | 0 | 1.516152  | 3.571825  | -1.930496 |
| 26  | 6        | 0    | 4.222892                | 2.152519  | 0.42273   | 52 | 1 | 0 | 4.832458  | 4.177606  | 0.729256  |
|     |          |      |                         |           |           | 53 | 1 | 0 | 4.991574  | 1.771695  | 1.084847  |

**Table S10.** Cartesian coordinate for **1c** at the optimized geometry in S<sub>1</sub> state.

| No. | Atom | Type | Coordinates (Angstroms) |           |           | 27 | 6 | 0 | 0.105395  | -1.815135 | -0.761573 |
|-----|------|------|-------------------------|-----------|-----------|----|---|---|-----------|-----------|-----------|
|     | No.  |      | x                       | y         | z         | 28 | 6 | 0 | -3.250298 | -0.433879 | -0.014992 |
| 1   | 9    | 0    | 1.076510                | 0.849657  | 1.518334  | 29 | 6 | 0 | -7.817863 | 1.126744  | 0.730875  |
| 2   | 9    | 0    | 0.618075                | -2.769773 | -1.546456 | 30 | 1 | 0 | -8.243314 | 1.940937  | 1.303243  |
| 3   | 6    | 0    | 2.397364                | 3.177695  | -1.169988 | 31 | 6 | 0 | -6.447320 | 0.945434  | 0.723371  |
| 4   | 9    | 0    | -1.540772               | 1.189146  | 1.484013  | 32 | 1 | 0 | -5.813482 | 1.618861  | 1.289777  |
| 5   | 6    | 0    | -1.875303               | -0.610541 | -0.014612 | 33 | 6 | 0 | -4.463042 | -0.279382 | -0.011734 |
| 6   | 6    | 0    | 4.470923                | 3.424696  | 0.075777  | 34 | 6 | 0 | -1.245013 | -1.646990 | -0.753587 |
| 7   | 6    | 0    | 2.395694                | -1.125854 | -0.063688 | 35 | 6 | 0 | -1.005845 | 0.232650  | 0.720359  |
| 8   | 6    | 0    | 0.347242                | 0.070993  | 0.709187  | 36 | 6 | 0 | -8.635499 | 0.255941  | -0.000666 |
| 9   | 6    | 0    | 3.433366                | 3.996472  | -0.683021 | 37 | 6 | 0 | -6.697290 | -0.971000 | -0.742510 |
| 10  | 6    | 0    | -5.855055               | -0.102077 | -0.009362 | 38 | 1 | 0 | -6.256189 | -1.781912 | -1.311496 |
| 11  | 6    | 0    | 1.000913                | -0.956842 | -0.045505 | 39 | 6 | 0 | 4.345147  | -2.358570 | 0.578162  |
| 12  | 6    | 0    | 3.420779                | -0.168155 | 0.167921  | 40 | 6 | 0 | 4.692086  | -0.860404 | 0.538615  |
| 13  | 6    | 0    | 3.407995                | 1.227943  | -0.106395 | 41 | 9 | 0 | 5.327260  | -3.124112 | 0.072804  |
| 14  | 9    | 0    | -2.009026               | -2.457117 | -1.491103 | 42 | 9 | 0 | 5.692163  | -0.651007 | -0.365570 |
| 15  | 8    | 0    | -9.976546               | 0.342834  | -0.060641 | 43 | 9 | 0 | 4.117035  | -2.739300 | 1.853083  |
| 16  | 6    | 0    | 2.384241                | 1.836186  | -0.892172 | 44 | 9 | 0 | 5.205528  | -0.474111 | 1.746620  |
| 17  | 6    | 0    | -8.060160               | -0.793467 | -0.736464 | 45 | 8 | 0 | 3.351527  | 5.294370  | -0.999340 |
| 18  | 1    | 0    | -8.715616               | -1.453060 | -1.294142 | 46 | 6 | 0 | 4.370861  | 6.184604  | -0.555558 |
| 19  | 6    | 0    | -10.629132              | 1.380682  | 0.659088  | 47 | 1 | 0 | 4.089139  | 7.166777  | -0.931479 |
| 20  | 1    | 0    | -10.440790              | 1.293534  | 1.733699  | 48 | 1 | 0 | 4.419663  | 6.208849  | 0.537076  |
| 21  | 1    | 0    | -11.693121              | 1.253855  | 0.464462  | 49 | 1 | 0 | 5.344372  | 5.899131  | -0.964818 |
| 22  | 1    | 0    | -10.307744              | 2.366023  | 0.307452  | 50 | 1 | 0 | 1.598188  | 1.220972  | -1.311537 |
| 23  | 9    | 0    | 3.349177                | -2.783353 | -1.511193 | 51 | 1 | 0 | 1.623989  | 3.632952  | -1.778788 |
| 24  | 9    | 0    | 2.294331                | -3.503337 | 0.264374  | 52 | 1 | 0 | 5.280055  | 4.034871  | 0.456402  |
| 25  | 6    | 0    | 3.033627                | -2.478682 | -0.220050 | 53 | 1 | 0 | 5.255592  | 1.658016  | 0.945972  |
| 26  | 6    | 0    | 4.457332                | 2.076325  | 0.346829  |    |   |   |           |           |           |

**Table S11.** Cartesian coordinate for **2a** at the optimized geometry in S<sub>0</sub> state.

| No. | Atom | Type | Coordinates (Angstroms) |           |           | No. | Atom | Type | Coordinates (Angstroms) |           |           |
|-----|------|------|-------------------------|-----------|-----------|-----|------|------|-------------------------|-----------|-----------|
|     | No.  |      | x                       | y         | z         |     |      |      | x                       | y         | z         |
| 1   | 9    | 0    | -4.087507               | 0.960188  | -1.980122 | 26  | 1    | 0    | 10.537839               | 2.156941  | -1.038578 |
| 2   | 9    | 0    | -1.689153               | 0.264027  | 2.023438  | 27  | 9    | 0    | -1.997287               | -4.104548 | 0.644224  |
| 3   | 9    | 0    | -3.852404               | 3.58927   | -1.649296 | 28  | 9    | 0    | -2.343105               | -3.720657 | -1.472546 |
| 4   | 9    | 0    | -1.443959               | 2.855411  | 2.353525  | 29  | 6    | 0    | -2.556712               | -3.240227 | -0.224032 |
| 5   | 9    | 0    | -0.716398               | -0.377793 | -2.096997 | 30  | 6    | 0    | -3.44046                | 1.413597  | -0.908934 |
| 6   | 9    | 0    | -0.306065               | -2.624021 | 2.030113  | 31  | 6    | 0    | 0.227694                | -1.981315 | 0.99162   |
| 7   | 6    | 0    | -2.098269               | 2.433682  | 1.275916  | 32  | 6    | 0    | 3.593496                | -0.763085 | -0.036754 |
| 8   | 9    | 0    | 1.907301                | 0.103286  | -2.096778 | 33  | 6    | 0    | 8.146392                | 0.683607  | -1.07433  |
| 9   | 6    | 0    | 2.200011                | -1.022754 | -0.04186  | 34  | 1    | 0    | 8.580639                | 1.235631  | -1.897935 |
| 10  | 6    | 0    | -3.316986               | 2.779127  | -0.737933 | 35  | 6    | 0    | 6.782198                | 0.427138  | -1.072108 |
| 11  | 6    | 0    | -2.028694               | -1.833121 | -0.093897 | 36  | 1    | 0    | 6.170705                | 0.782692  | -1.894423 |
| 12  | 6    | 0    | 0.021197                | -0.833312 | -1.081284 | 37  | 6    | 0    | 4.781684                | -0.541551 | -0.033078 |
| 13  | 6    | 0    | -2.645066               | 3.316497  | 0.354789  | 38  | 6    | 0    | 1.58594                 | -1.727091 | 0.996761  |
| 14  | 6    | 0    | 6.18304                 | -0.282604 | -0.026753 | 39  | 6    | 0    | 1.379537                | -0.579188 | -1.081319 |
| 15  | 6    | 0    | -0.585653               | -1.54989  | -0.052537 | 40  | 6    | 0    | 8.935522                | 0.226656  | -0.016886 |
| 16  | 6    | 0    | -3.02301                | -0.938536 | -0.143514 | 41  | 6    | 0    | 6.989684                | -0.736455 | 1.030944  |
| 17  | 6    | 0    | -2.894363               | 0.520101  | 0.008375  | 42  | 1    | 0    | 6.538281                | -1.288228 | 1.848357  |
| 18  | 9    | 0    | 2.31628                 | -2.156898 | 2.025042  | 43  | 6    | 0    | -4.070514               | -3.094131 | 0.022997  |
| 19  | 8    | 0    | 10.269729               | 0.42054   | 0.080668  | 44  | 6    | 0    | -4.360738               | -1.616202 | -0.313348 |
| 20  | 6    | 0    | -2.225107               | 1.062717  | 1.099924  | 45  | 9    | 0    | -4.332445               | -3.314681 | 1.324644  |
| 21  | 6    | 0    | 8.345908                | -0.485263 | 1.035243  | 46  | 9    | 0    | -5.304276               | -1.096433 | 0.496284  |
| 22  | 1    | 0    | 8.97761                 | -0.830688 | 1.846128  | 47  | 9    | 0    | -4.794513               | -3.938505 | -0.723374 |
| 23  | 6    | 0    | 10.926433               | 1.136751  | -0.95373  | 48  | 9    | 0    | -4.819146               | -1.539991 | -1.584316 |
| 24  | 1    | 0    | 10.824499               | 0.62596   | -1.916888 | 49  | 6    | 0    | -2.554061               | 4.816502  | 0.464215  |
| 25  | 1    | 0    | 11.978246               | 1.172139  | -0.672151 | 50  | 9    | 0    | -3.778711               | 5.36048   | 0.513788  |
|     |      |      |                         |           |           | 51  | 9    | 0    | -1.888304               | 5.214174  | 1.549577  |
|     |      |      |                         |           |           | 52  | 9    | 0    | -1.93256                | 5.330172  | -0.607292 |

**Table S12.** Cartesian coordinate for **2a** at the optimized geometry in S<sub>1</sub> state.

| No. | Atom | Type | Coordinates (Angstroms) |           |           | No. | Atom | Type | Coordinates (Angstroms) |           |           |
|-----|------|------|-------------------------|-----------|-----------|-----|------|------|-------------------------|-----------|-----------|
|     | No.  |      | x                       | y         | z         |     |      |      | x                       | y         | z         |
| 1   | 9    | 0    | -4.607332               | 0.659011  | -1.748029 | 26  | 1    | 0    | 10.493550               | 2.910154  | -0.451983 |
| 2   | 9    | 0    | -1.348676               | 0.415352  | 1.699863  | 27  | 9    | 0    | -2.315846               | -3.562349 | 1.641798  |
| 3   | 9    | 0    | -4.843596               | 3.235297  | -1.304266 | 28  | 9    | 0    | -1.532246               | -4.238930 | -0.281048 |
| 4   | 9    | 0    | -1.553575               | 2.972106  | 2.081537  | 29  | 6    | 0    | -2.269571               | -3.271324 | 0.313822  |
| 5   | 9    | 0    | -0.645796               | 0.228076  | -1.508075 | 30  | 6    | 0    | -3.854578               | 1.190977  | -0.782292 |
| 6   | 9    | 0    | 0.224501                | -3.383318 | 1.483533  | 31  | 6    | 0    | 0.609875                | -2.352011 | 0.728992  |
| 7   | 6    | 0    | -2.315826               | 2.438583  | 1.126270  | 32  | 6    | 0    | 3.790716                | -0.634200 | -0.040876 |
| 8   | 9    | 0    | 1.917909                | 0.823515  | -1.505414 | 33  | 6    | 0    | 8.131882                | 1.416878  | -0.852257 |
| 9   | 6    | 0    | 2.454050                | -0.946856 | -0.027718 | 34  | 1    | 0    | 8.461093                | 2.273366  | -1.425566 |
| 10  | 6    | 0    | -3.975862               | 2.543638  | -0.560445 | 35  | 6    | 0    | 6.797955                | 1.089191  | -0.823910 |
| 11  | 6    | 0    | -1.758203               | -1.878846 | 0.046772  | 36  | 1    | 0    | 6.080600                | 1.687117  | -1.374266 |
| 12  | 6    | 0    | 0.166362                | -0.495414 | -0.730007 | 37  | 6    | 0    | 4.989470                | -0.350932 | -0.058500 |
| 13  | 6    | 0    | -3.212042               | 3.211268  | 0.394994  | 38  | 6    | 0    | 1.936455                | -2.051196 | 0.708518  |
| 14  | 6    | 0    | 6.334494                | -0.029235 | -0.079763 | 39  | 6    | 0    | 1.490689                | -0.188511 | -0.752342 |
| 15  | 6    | 0    | -0.374394               | -1.580630 | 0.031937  | 40  | 6    | 0    | 9.054574                | 0.632085  | -0.133276 |
| 16  | 6    | 0    | -2.844121               | -1.036600 | -0.248009 | 41  | 6    | 0    | 7.284558                | -0.809285 | 0.641311  |
| 17  | 6    | 0    | -2.950619               | 0.384521  | -0.059654 | 42  | 1    | 0    | 6.940573                | -1.664005 | 1.212164  |
| 18  | 9    | 0    | 2.786993                | -2.793158 | 1.415614  | 43  | 6    | 0    | -3.717798               | -3.295068 | -0.236621 |
| 19  | 8    | 0    | 10.364674               | 0.862299  | -0.095383 | 44  | 6    | 0    | -4.015113               | -1.850030 | -0.702030 |
| 20  | 6    | 0    | -2.199937               | 1.079160  | 0.908938  | 45  | 9    | 0    | -4.589709               | -3.662154 | 0.720792  |
| 21  | 6    | 0    | 8.611836                | -0.483111 | 0.612434  | 46  | 9    | 0    | -5.198981               | -1.428095 | -0.192945 |
| 22  | 1    | 0    | 9.349755                | -1.063827 | 1.153631  | 47  | 9    | 0    | -3.817371               | -4.168872 | -1.255034 |
| 23  | 6    | 0    | 10.909090               | 1.967255  | -0.817226 | 48  | 9    | 0    | -4.158952               | -1.864707 | -2.060009 |
| 24  | 1    | 0    | 10.718102               | 1.861530  | -1.888437 | 49  | 6    | 0    | -3.401740               | 4.688543  | 0.564411  |
| 25  | 1    | 0    | 11.980586               | 1.939454  | -0.629339 | 50  | 9    | 0    | -4.673744               | 4.977575  | 0.888502  |
|     |      |      |                         |           |           | 51  | 9    | 0    | -2.618078               | 5.204970  | 1.515515  |
|     |      |      |                         |           |           | 52  | 9    | 0    | -3.133819               | 5.343982  | -0.578332 |

**Table S13.** Cartesian coordinate for **2b** at the optimized geometry in S<sub>0</sub> state.

| No. | Atom | Type | Coordinates (Angstroms) |           |           | No. | Atom | Type | Coordinates (Angstroms) |           |           |
|-----|------|------|-------------------------|-----------|-----------|-----|------|------|-------------------------|-----------|-----------|
|     | No.  |      | x                       | y         | z         |     |      |      | x                       | y         | z         |
| 1   | 9    | 0    | -4.245444               | 1.795886  | -1.779251 | 25  | 1    | 0    | 11.86551                | 0.825651  | -0.647565 |
| 2   | 9    | 0    | -1.791773               | 0.675609  | 2.096755  | 26  | 1    | 0    | 10.492849               | 1.909735  | -0.992933 |
| 3   | 9    | 0    | -3.849776               | 4.400915  | -1.265925 | 27  | 9    | 0    | -2.423574               | -3.556755 | 0.45983   |
| 4   | 9    | 0    | -1.394418               | 3.280701  | 2.588432  | 28  | 9    | 0    | -2.758463               | -3.020347 | -1.625316 |
| 5   | 9    | 0    | -0.905235               | 0.220671  | -2.065716 | 29  | 6    | 0    | -2.930996               | -2.604242 | -0.346935 |
| 6   | 9    | 0    | -0.644809               | -2.264742 | 1.93399   | 30  | 6    | 0    | -3.545517               | 2.135518  | -0.69855  |
| 7   | 6    | 0    | -2.08926                | 2.910634  | 1.516002  | 31  | 6    | 0    | -0.069328               | -1.605647 | 0.928294  |
| 8   | 9    | 0    | 1.744747                | 0.521498  | -2.052453 | 32  | 6    | 0    | 3.370634                | -0.565429 | -0.049863 |
| 9   | 6    | 0    | 1.962571                | -0.72995  | -0.061796 | 33  | 6    | 0    | 8.009953                | 0.599864  | -1.056912 |
| 10  | 6    | 0    | -3.347583               | 3.481802  | -0.445713 | 34  | 1    | 0    | 8.479929                | 1.140921  | -1.868062 |
| 11  | 6    | 0    | -2.312319               | -1.245985 | -0.134737 | 35  | 6    | 0    | 6.631775                | 0.433931  | -1.059147 |
| 12  | 6    | 0    | -0.199844               | -0.337531 | -1.079023 | 36  | 1    | 0    | 6.045464                | 0.84807   | -1.872332 |
| 13  | 6    | 0    | -2.616239               | 3.86977   | 0.665857  | 37  | 6    | 0    | 4.570975                | -0.424265 | -0.041292 |
| 14  | 6    | 0    | 5.986531                | -0.25893  | -0.030063 | 38  | 6    | 0    | 1.303147                | -1.4456   | 0.940571  |
| 15  | 6    | 0    | -0.85296                | -1.064217 | -0.086687 | 39  | 6    | 0    | 1.172812                | -0.176762 | -1.071917 |
| 16  | 6    | 0    | -3.245532               | -0.285585 | -0.118608 | 40  | 6    | 0    | 8.76672                 | 0.067667  | -0.011132 |
| 17  | 6    | 0    | -3.026713               | 1.146727  | 0.13427   | 41  | 6    | 0    | 6.761042                | -0.789457 | 1.015865  |
| 18  | 9    | 0    | 2.003846                | -1.97912  | 1.940823  | 42  | 1    | 0    | 6.273941                | -1.32919  | 1.82074   |
| 19  | 8    | 0    | 10.11084                | 0.171227  | 0.089651  | 43  | 6    | 0    | -4.429447               | -2.375862 | -0.074909 |
| 20  | 6    | 0    | -2.298589               | 1.569219  | 1.246325  | 44  | 6    | 0    | -4.62359                | -0.866364 | -0.325992 |
| 21  | 6    | 0    | 8.130898                | -0.628092 | 1.024726  | 45  | 9    | 0    | -4.694728               | -2.65043  | 1.216162  |
| 22  | 1    | 0    | 8.737992                | -1.03306  | 1.82681   | 46  | 9    | 0    | -5.536508               | -0.33439  | 0.510452  |
| 23  | 6    | 0    | 10.813929               | 0.864798  | -0.929536 | 47  | 9    | 0    | -5.213594               | -3.12987  | -0.856929 |
| 24  | 1    | 0    | 10.680051               | 0.382142  | -1.903239 | 48  | 9    | 0    | -5.071317               | -0.691954 | -1.59174  |
|     |      |      |                         |           |           | 49  | 9    | 0    | -2.421274               | 5.157867  | 0.915861  |

**Table S14.** Cartesian coordinate for **2b** at the optimized geometry in S<sub>1</sub> state.

| No. | Atom | Type | Coordinates (Angstroms) |           |           |    |   |   |           |           |           |
|-----|------|------|-------------------------|-----------|-----------|----|---|---|-----------|-----------|-----------|
|     | No.  |      | x                       | y         | z         |    |   |   |           |           |           |
| 1   | 9    | 0    | -4.714128               | 1.640941  | -1.596078 | 25 | 1 | 0 | 11.872506 | 1.321319  | -0.530054 |
| 2   | 9    | 0    | -1.553734               | 0.833544  | 1.854624  | 26 | 1 | 0 | 10.478091 | 2.400382  | -0.254328 |
| 3   | 9    | 0    | -4.711643               | 4.218970  | -0.964883 | 27 | 9 | 0 | -2.822581 | -3.034191 | 1.487941  |
| 4   | 9    | 0    | -1.532650               | 3.427101  | 2.412628  | 28 | 9 | 0 | -2.204579 | -3.611091 | -0.525505 |
| 5   | 9    | 0    | -0.870014               | 0.835700  | -1.394178 | 29 | 6 | 0 | -2.806967 | -2.630556 | 0.189143  |
| 6   | 9    | 0    | -0.303415               | -3.102094 | 1.242262  | 30 | 6 | 0 | -3.934244 | 2.032328  | -0.586839 |
| 7   | 6    | 0    | -2.307767               | 2.978967  | 1.424792  | 31 | 6 | 0 | 0.163004  | -2.036088 | 0.586942  |
| 8   | 9    | 0    | 1.733699                | 1.197294  | -1.378516 | 32 | 6 | 0 | 3.480953  | -0.542874 | -0.070748 |
| 9   | 6    | 0    | 2.122259                | -0.736128 | -0.067091 | 33 | 6 | 0 | 7.991838  | 1.168001  | -0.754686 |
| 10  | 6    | 0    | -3.937946               | 3.377866  | -0.278529 | 34 | 1 | 0 | 8.395917  | 2.038065  | -1.255318 |
| 11  | 6    | 0    | -2.162568               | -1.278614 | 0.010792  | 35 | 6 | 0 | 6.632765  | 0.962361  | -0.739428 |
| 12  | 6    | 0    | -0.122869               | -0.021621 | -0.688409 | 36 | 1 | 0 | 5.971955  | 1.669843  | -1.227182 |
| 13  | 6    | 0    | -3.120011               | 3.863182  | 0.731010  | 37 | 6 | 0 | 4.700879  | -0.368399 | -0.080496 |
| 14  | 6    | 0    | 6.070246                | -0.169712 | -0.090907 | 38 | 6 | 0 | 1.510570  | -1.854134 | 0.571457  |
| 15  | 6    | 0    | -0.756926               | -1.115445 | -0.012942 | 39 | 6 | 0 | 1.223269  | 0.165720  | -0.706205 |
| 16  | 6    | 0    | -3.164506               | -0.316509 | -0.198530 | 40 | 6 | 0 | 8.841058  | 0.242864  | -0.118196 |
| 17  | 6    | 0    | -3.128165               | 1.094956  | 0.088501  | 41 | 6 | 0 | 6.948040  | -1.093338 | 0.547072  |
| 18  | 9    | 0    | 2.296828                | -2.736120 | 1.188573  | 42 | 1 | 0 | 6.529589  | -1.960521 | 1.044864  |
| 19  | 8    | 0    | 10.168708               | 0.348684  | -0.074963 | 43 | 6 | 0 | -4.274699 | -2.460078 | -0.279092 |
| 20  | 6    | 0    | -2.323262               | 1.634683  | 1.111825  | 44 | 6 | 0 | -4.415682 | -0.975441 | -0.681271 |
| 21  | 6    | 0    | 8.300113                | -0.888161 | 0.531275  | 45 | 9 | 0 | -5.130501 | -2.746378 | 0.720611  |
| 22  | 1    | 0    | 8.983136                | -1.579711 | 1.010913  | 46 | 9 | 0 | -5.548433 | -0.449502 | -0.152672 |
| 23  | 6    | 0    | 10.806987               | 1.459283  | -0.703421 | 47 | 9 | 0 | -4.542787 | -3.281964 | -1.310212 |
| 24  | 1    | 0    | 10.604969               | 1.465355  | -1.777991 | 48 | 9 | 0 | -4.559179 | -0.917392 | -2.039738 |
|     |      |      |                         |           |           | 49 | 9 | 0 | -3.115109 | 5.158196  | 1.029887  |



**Table S15.** Cartesian coordinate for **2c** at the optimized geometry in S<sub>0</sub> state.

| No. | Atom | Type | Coordinates (Angstroms) |           |           |    |   |   |           |           |           |
|-----|------|------|-------------------------|-----------|-----------|----|---|---|-----------|-----------|-----------|
|     | No.  |      | x                       | y         | z         |    |   |   |           |           |           |
| 1   | 9    | 0    | -4.395936               | 1.393595  | -1.739953 | 27 | 9 | 0 | -2.132812 | -3.781758 | 0.583506  |
| 2   | 9    | 0    | -1.635903               | 0.549054  | 1.99602   | 28 | 9 | 0 | -2.475077 | -3.353338 | -1.525035 |
| 3   | 9    | 0    | -4.207332               | 3.972956  | -1.339153 | 29 | 6 | 0 | -2.68393  | -2.891893 | -0.26686  |
| 4   | 9    | 0    | -1.434089               | 3.162928  | 2.418949  | 30 | 6 | 0 | -3.656869 | 1.797938  | -0.705406 |
| 5   | 9    | 0    | -0.790648               | -0.072845 | -2.106574 | 31 | 6 | 0 | 0.106744  | -1.698498 | 0.983105  |
| 6   | 9    | 0    | -0.445618               | -2.325078 | 2.022334  | 32 | 6 | 0 | 3.506382  | -0.578433 | -0.045096 |
| 7   | 6    | 0    | -2.155309               | 2.729192  | 1.382738  | 33 | 6 | 0 | 8.106218  | 0.717353  | -1.079324 |
| 8   | 9    | 0    | 1.844291                | 0.336251  | -2.105077 | 34 | 1 | 0 | 8.560331  | 1.248179  | -1.906152 |
| 9   | 6    | 0    | 2.105439                | -0.797323 | -0.050028 | 35 | 6 | 0 | 6.734555  | 0.503537  | -1.080069 |
| 10  | 6    | 0    | -3.559056               | 3.163095  | -0.489241 | 36 | 1 | 0 | 6.137466  | 0.870609  | -1.907899 |
| 11  | 6    | 0    | -2.144564               | -1.495044 | -0.103553 | 37 | 6 | 0 | 4.700726  | -0.393353 | -0.040011 |
| 12  | 6    | 0    | -0.068151               | -0.546219 | -1.088588 | 38 | 6 | 0 | 1.471602  | -1.484261 | 0.988371  |
| 13  | 6    | 0    | -2.80398                | 3.668546  | 0.570923  | 39 | 6 | 0 | 1.297303  | -0.330359 | -1.088417 |
| 14  | 6    | 0    | 6.109677                | -0.177733 | -0.03096  | 40 | 6 | 0 | 8.876953  | 0.245653  | -0.014947 |
| 15  | 6    | 0    | -0.695173               | -1.243275 | -0.059359 | 41 | 6 | 0 | 6.89816   | -0.646892 | 1.033669  |
| 16  | 6    | 0    | -3.129839               | -0.585455 | -0.129078 | 42 | 1 | 0 | 6.426875  | -1.177022 | 1.854195  |
| 17  | 6    | 0    | -3.008316               | 0.85993   | 0.089689  | 43 | 6 | 0 | -4.194373 | -2.736608 | -0.018077 |
| 18  | 9    | 0    | 2.190129                | -1.93606  | 2.016319  | 44 | 6 | 0 | -4.465733 | -1.256439 | -0.349687 |
| 19  | 8    | 0    | 10.216488               | 0.398836  | 0.086037  | 45 | 9 | 0 | -4.458546 | -2.958315 | 1.283858  |
| 20  | 6    | 0    | -2.257826               | 1.375301  | 1.150201  | 46 | 9 | 0 | -5.440855 | -0.740107 | 0.423762  |
| 21  | 6    | 0    | 8.261621                | -0.437985 | 1.041074  | 47 | 9 | 0 | -4.92842  | -3.573221 | -0.764744 |
| 22  | 1    | 0    | 8.879216                | -0.795661 | 1.857512  | 48 | 9 | 0 | -4.873277 | -1.177051 | -1.639409 |
| 23  | 6    | 0    | 10.898669               | 1.08409   | -0.952663 | 49 | 8 | 0 | -2.613731 | 4.949441  | 0.903734  |
| 24  | 1    | 0    | 10.784736               | 0.567105  | -1.91119  | 50 | 6 | 0 | -3.37934  | 5.992371  | 0.289149  |
| 25  | 1    | 0    | 11.950055               | 1.090073  | -0.667278 | 51 | 1 | 0 | -3.101145 | 6.896623  | 0.82781   |
| 26  | 1    | 0    | 10.541993               | 2.114852  | -1.049382 | 52 | 1 | 0 | -3.124981 | 6.094853  | -0.766412 |
|     |      |      |                         |           |           | 53 | 1 | 0 | -4.449313 | 5.807687  | -0.766412 |

**Table S16.** Cartesian coordinate for **2c** at the optimized geometry in S<sub>1</sub> state.

| No. | Atom | Type | Coordinates (Angstroms) |           |           | No. | Atom | Type | x         | y         | z         |
|-----|------|------|-------------------------|-----------|-----------|-----|------|------|-----------|-----------|-----------|
|     | No.  |      | x                       | y         | z         |     |      |      |           |           |           |
| 1   | 9    | 0    | -4.703510               | 1.241255  | -1.622093 | 33  | 6    | 0    | 8.061886  | 1.319381  | -0.777286 |
| 2   | 9    | 0    | -1.478831               | 0.673824  | 1.813318  | 34  | 1    | 0    | 8.428523  | 2.196150  | -1.294868 |
| 3   | 9    | 0    | -4.862890               | 3.772696  | -1.084217 | 35  | 6    | 0    | 6.709418  | 1.059720  | -0.754370 |
| 4   | 9    | 0    | -1.600566               | 3.256773  | 2.313690  | 36  | 1    | 0    | 6.021475  | 1.732935  | -1.253323 |
| 5   | 9    | 0    | -0.782704               | 0.628578  | -1.402397 | 37  | 6    | 0    | 4.828007  | -0.332104 | -0.068696 |
| 6   | 9    | 0    | -0.067169               | -3.224299 | 1.324886  | 38  | 6    | 0    | 1.698238  | -1.925628 | 0.618374  |
| 7   | 6    | 0    | -2.360674               | 2.754587  | 1.336803  | 39  | 6    | 0    | 1.333304  | 0.050987  | -0.699421 |
| 8   | 9    | 0    | 1.802715                | 1.090536  | -1.390937 | 40  | 6    | 0    | 8.947565  | 0.442289  | -0.128424 |
| 9   | 6    | 0    | 2.265405                | -0.800802 | -0.044112 | 41  | 6    | 0    | 7.107370  | -0.952768 | 0.563760  |
| 10  | 6    | 0    | -4.017660               | 3.036776  | -0.346126 | 42  | 1    | 0    | 6.725820  | -1.827308 | 1.078392  |
| 11  | 6    | 0    | -1.990021               | -1.521607 | 0.034888  | 43  | 6    | 0    | -4.031212 | -2.812632 | -0.280652 |
| 12  | 6    | 0    | -0.005241               | -0.186692 | -0.678837 | 44  | 6    | 0    | -4.243615 | -1.342722 | -0.709577 |
| 13  | 6    | 0    | -3.224970               | 3.621374  | 0.648587  | 45  | 9    | 0    | -4.904158 | -3.137526 | 0.692157  |
| 14  | 6    | 0    | 6.194575                | -0.078381 | -0.086353 | 46  | 9    | 0    | -5.413906 | -0.875601 | -0.207045 |
| 15  | 6    | 0    | -0.598085               | -1.295124 | 0.011804  | 47  | 9    | 0    | -4.216143 | -3.659487 | -1.310258 |
| 16  | 6    | 0    | -3.039807               | -0.609129 | -0.212929 | 48  | 9    | 0    | -4.366995 | -1.310813 | -2.070851 |
| 17  | 6    | 0    | -3.080422               | 0.797078  | 0.053556  | 49  | 8    | 0    | -3.186074 | 4.900741  | 1.027281  |
| 18  | 9    | 0    | 2.517314                | -2.760035 | 1.260706  | 50  | 6    | 0    | -4.044852 | 5.878474  | 0.429771  |
| 19  | 8    | 0    | 10.274515               | 0.602131  | -0.090733 | 51  | 1    | 0    | -3.812765 | 6.807010  | 0.948398  |
| 20  | 6    | 0    | -2.297243               | 1.412688  | 1.057517  | 52  | 1    | 0    | -3.833789 | 5.983069  | -0.635581 |
| 21  | 6    | 0    | 8.452755                | -0.695042 | 0.540895  | 53  | 1    | 0    | -5.093991 | 5.618998  | 0.580956  |
| 22  | 1    | 0    | 9.161854                | -1.351982 | 1.031533  | 54  | 9    | 0    | -4.703510 | 1.241255  | -1.622093 |
| 23  | 6    | 0    | 10.859871               | 1.726650  | -0.741336 | 55  | 9    | 0    | -1.478831 | 0.673824  | 1.813318  |
| 24  | 1    | 0    | 10.653597               | 1.706823  | -1.815297 | 56  | 9    | 0    | -4.862890 | 3.772696  | -1.084217 |
| 25  | 1    | 0    | 11.931715               | 1.639670  | -0.572270 | 57  | 9    | 0    | -1.600566 | 3.256773  | 2.313690  |
| 26  | 1    | 0    | 10.493368               | 2.661874  | -0.308469 | 58  | 9    | 0    | -0.782704 | 0.628578  | -1.402397 |
| 27  | 9    | 0    | -2.609942               | -3.263430 | 1.548733  | 59  | 9    | 0    | -0.067169 | -3.224299 | 1.324886  |
| 28  | 9    | 0    | -1.904673               | -3.868758 | -0.427353 | 60  | 6    | 0    | -2.360674 | 2.754587  | 1.336803  |
| 29  | 6    | 0    | -2.572930               | -2.895877 | 0.238834  | 61  | 9    | 0    | 1.802715  | 1.090536  | -1.390937 |
| 30  | 6    | 0    | -3.939879               | 1.686976  | -0.622662 | 62  | 6    | 0    | 2.265405  | -0.800802 | -0.044112 |
| 31  | 6    | 0    | 0.359068                | -2.161672 | 0.636652  | 63  | 6    | 0    | -4.017660 | 3.036776  | -0.346126 |
| 32  | 6    | 0    | 3.619112                | -0.554071 | -0.053478 | 64  | 6    | 0    | -1.990021 | -1.521607 | 0.034888  |
|     |      |      |                         |           |           | 65  | 6    | 0    | -0.005241 | -0.186692 | -0.678837 |

#### 4. Crystal structures

Single crystal X-ray diffractions were recorded on an XtaLAB AFC11 diffractometer (Rigaku, Tokyo, Japan). The reflection data were integrated, scaled, and averaged using CrysAlisPro program (ver. 1.171.39.43a, Rigaku Corporation, Akishima, Japan). Empirical absorption corrections were applied using the SCALE 3 ABSPACK scaling algorithm (CrysAlisPro). The structures were assigned by a direct method (SHELXT-2018/2) and refined using a full matrix least squares method (SHELXL-2018/3) visualized by Olex2. The crystallographic data were deposited into the Cambridge Crystallographic Data Centre (CCDC) database (CCDC 2104837 for **1c** and 2104836 for **2bB**). These data can be accessible free of charge from the CCDC via [www.ccdc.cam.ac.uk/data\\_request/cis](http://www.ccdc.cam.ac.uk/data_request/cis).

**Table S17.** Crystallographic data

|                                                                              | <b>1c</b>                                                      | <b>2bB</b>                                            |
|------------------------------------------------------------------------------|----------------------------------------------------------------|-------------------------------------------------------|
| CCDC No.                                                                     | 2104837                                                        | 2104836                                               |
| Empirical formula                                                            | C <sub>27</sub> H <sub>14</sub> F <sub>10</sub> O <sub>2</sub> | C <sub>27</sub> H <sub>9</sub> F <sub>15</sub> O      |
| Formula weight                                                               | 560.38                                                         | 634.34                                                |
| Temperature [K]                                                              | 298                                                            | 273                                                   |
| Crystal color / Habit                                                        | Colourless / Plate                                             | Colourless / Block                                    |
| Crystal size [mm]                                                            | 0.46 x 0.32 x 0.19                                             | 0.13 x 0.12 x 0.10                                    |
| Crystal system                                                               | monoclinic                                                     | Orthorhombic                                          |
| Space group                                                                  | <i>P</i> 1 2 <sub>1</sub> /c 1                                 | <i>P</i> 2 <sub>1</sub> 2 <sub>1</sub> 2 <sub>1</sub> |
| <i>a</i> [Å]                                                                 | 22.3083(9)                                                     | 7.5863(7)                                             |
| <i>b</i> [Å]                                                                 | 7.9227(3)                                                      | 14.4269(12)                                           |
| <i>c</i> [Å]                                                                 | 13.7583(5)                                                     | 23.186(2)                                             |
| <i>a</i> [°]                                                                 | 90                                                             | 90                                                    |
| <i>b</i> [°]                                                                 | 99.227(4)                                                      | 90                                                    |
| <i>g</i> [°]                                                                 | 90                                                             | 90                                                    |
| <i>V</i> [Å <sup>3</sup> ]                                                   | 2400.21(16)                                                    | 2537.6(4)                                             |
| <i>Z</i>                                                                     | 4                                                              | 4                                                     |
| <i>R</i> [ <i>F</i> <sup>2</sup> > 2 <i>s</i> ( <i>F</i> <sup>2</sup> )] [a] | 0.0559                                                         | 0.0563                                                |
| <i>wR</i> ( <i>F</i> <sup>2</sup> ) [b]                                      | 0.1609                                                         | 0.1283                                                |

[a]  $R = \sum ||F_o| - |F_c|| / \sum |F_o|$ . [b]  $wR = \{[\sum w(|F_o| - |F_c|)] / \sum w|F_o|\}^{1/2}$ .

## 5. Photophysical behavior

### 5.1. UV-vis and PL spectra of 1a–c and 2a–c in CH<sub>2</sub>Cl<sub>2</sub> solution

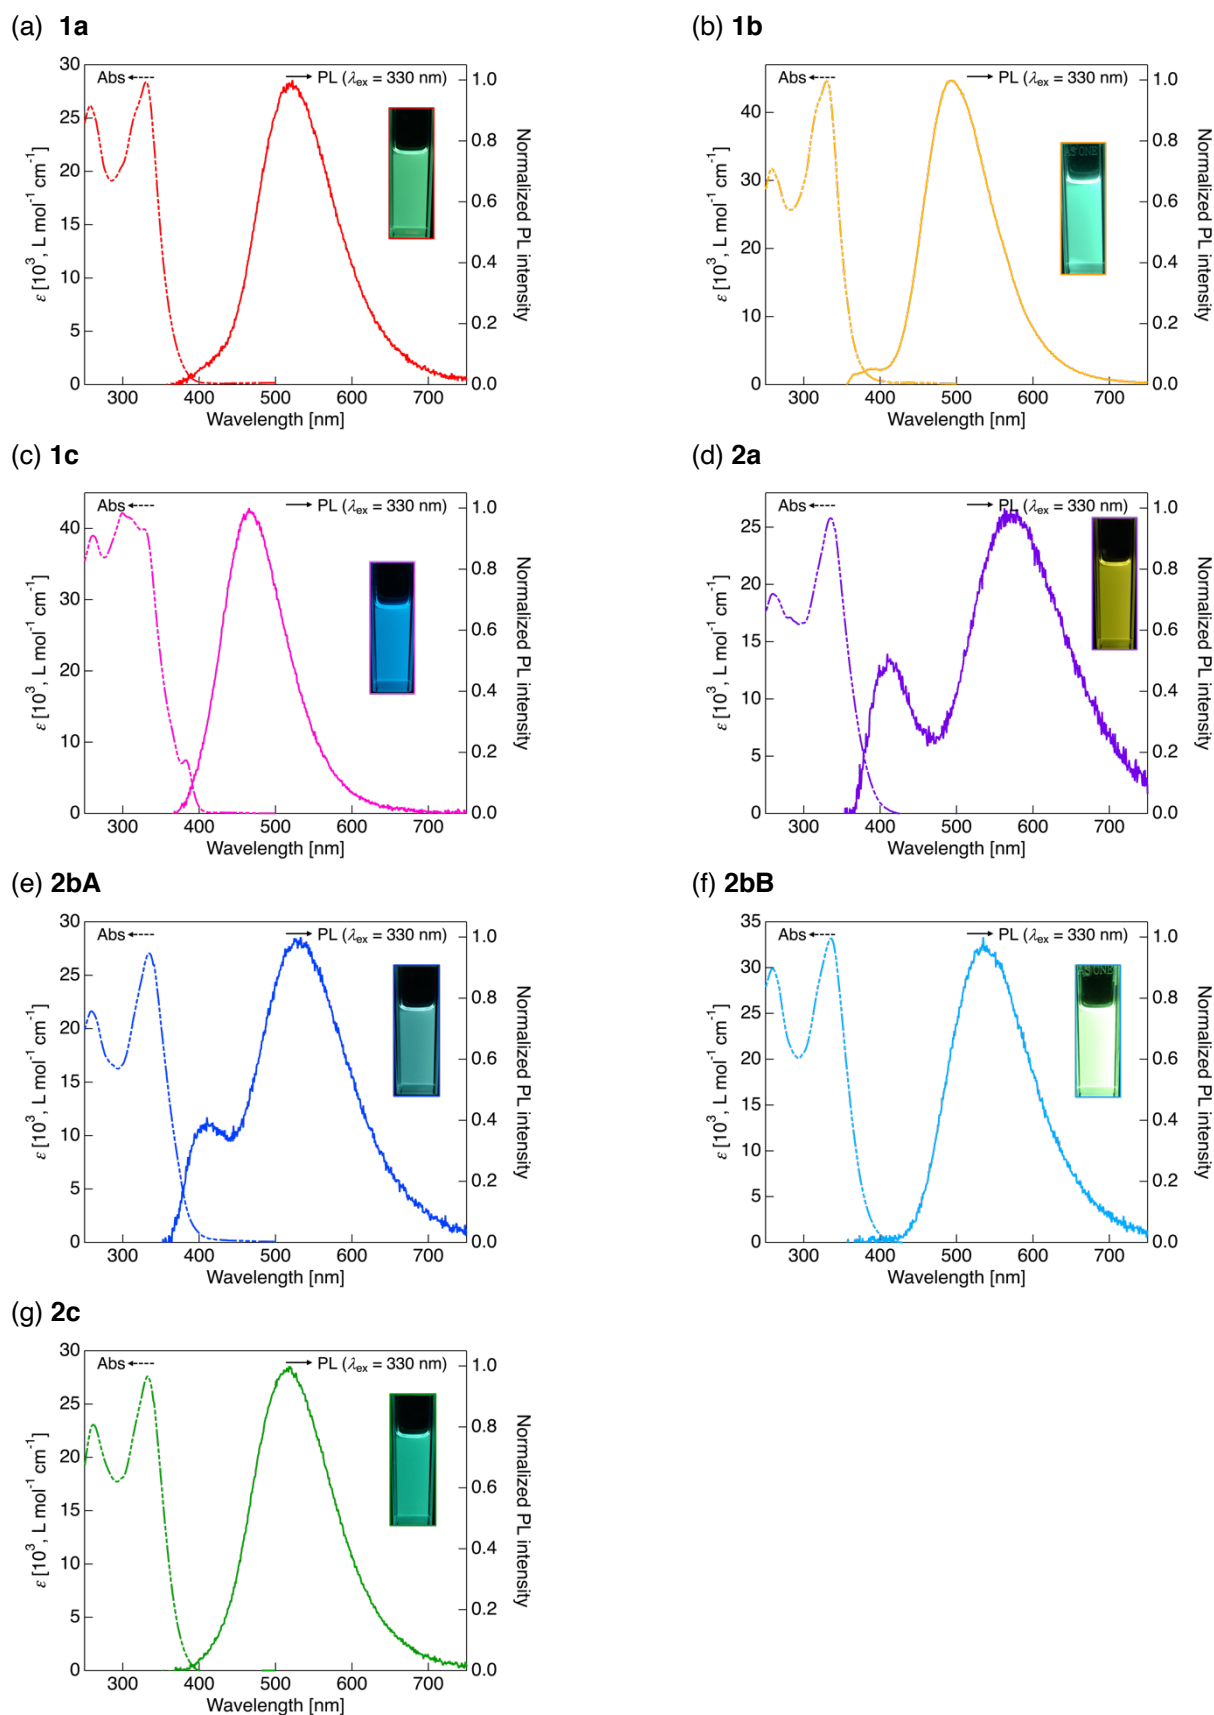

**Figure S32.** UV-vis absorption and PL spectra of **1a–c** and **2a–c** in CH<sub>2</sub>Cl<sub>2</sub> solution. Concentration:  $1.0 \times 10^{-5}$  mol L<sup>-1</sup> for UV-vis absorption measurement and  $1.0 \times 10^{-6}$  mol L<sup>-1</sup> for PL measurement.

## 5.2. Fluorescence decay profiles of 1a–c and 2a–c in CH<sub>2</sub>Cl<sub>2</sub> solution

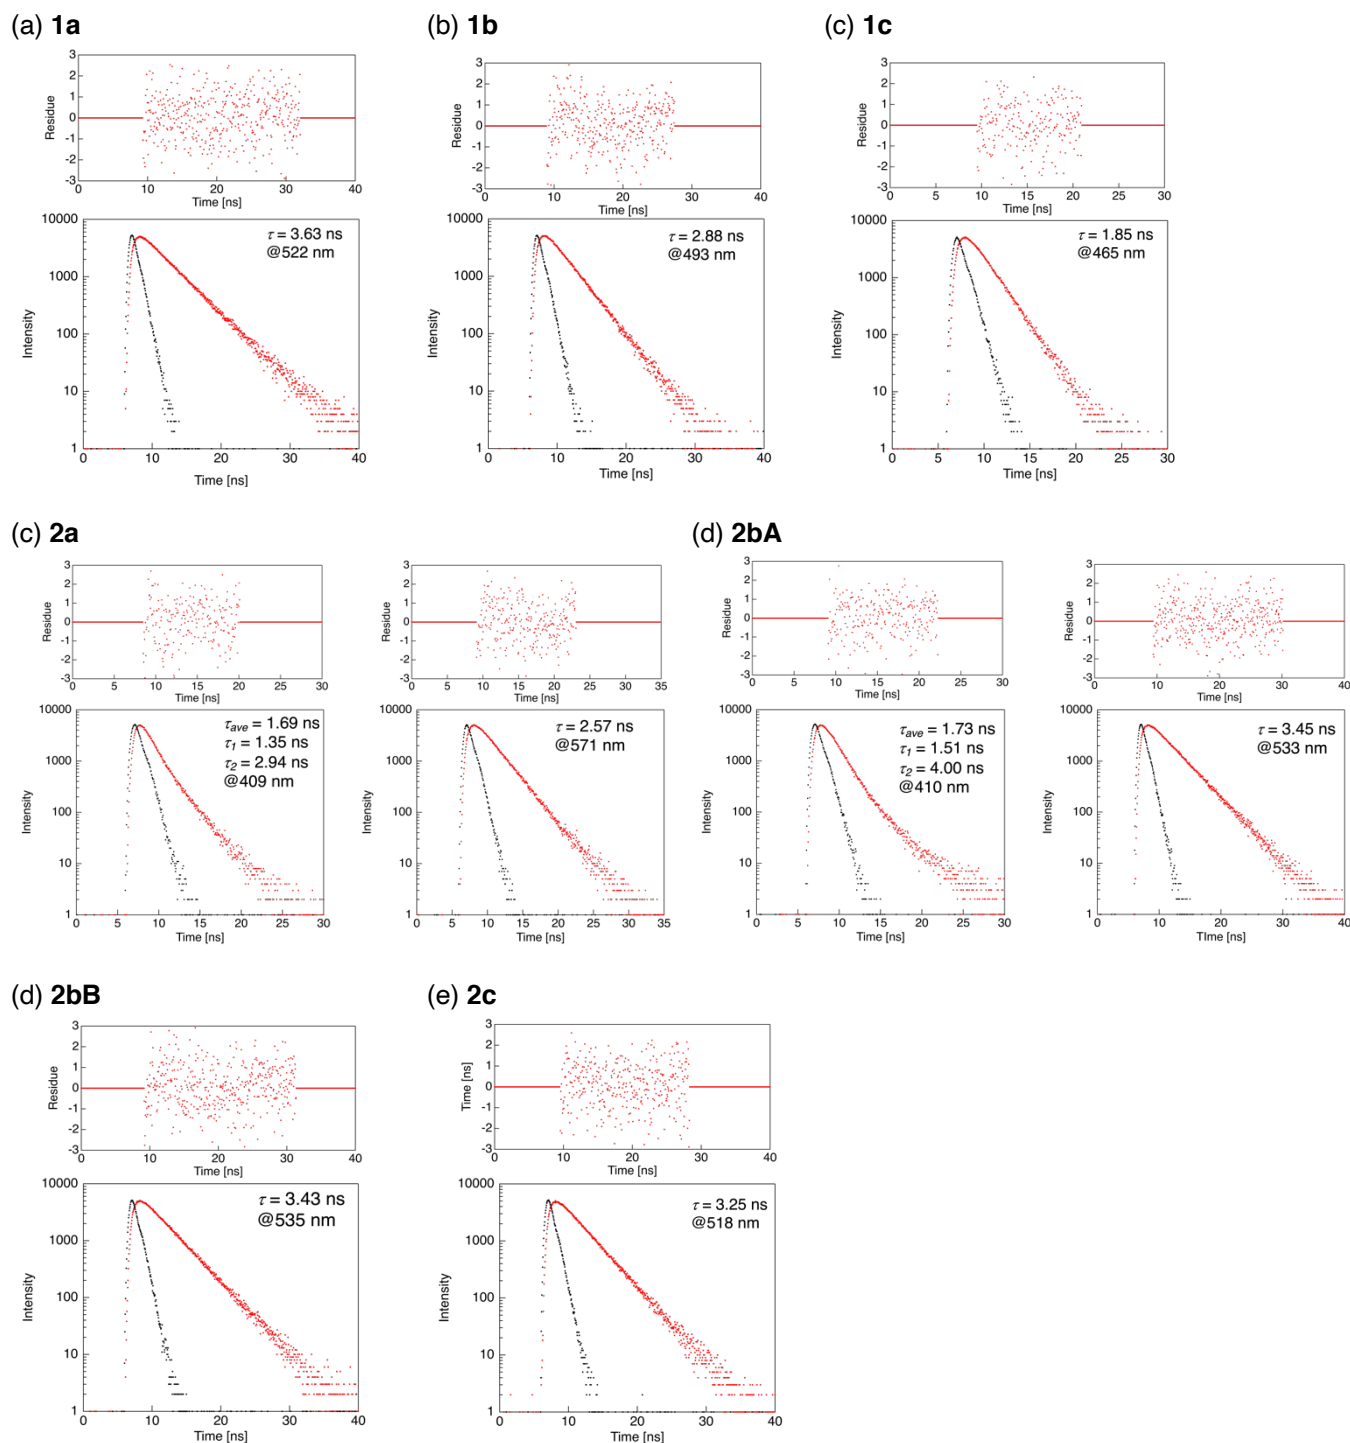

**Figure S33.** PL lifetime measurement of **1a–c** and **2a–c** in 10<sup>−6</sup> mol L<sup>−1</sup> CH<sub>2</sub>Cl<sub>2</sub> solution using a Quantaurus-Tau fluorescence lifetime spectrometer (C11367-34)..

**Table S18.** Average fluorescence lifetime, the radiative and non-radiative rate constant in CH<sub>2</sub>Cl<sub>2</sub> solution

| Molecule   | $\Phi_{\text{PL}}^{\text{a}}$ | $\tau_{\text{ave}}$ [ns] | $k_{\text{f}}$ [10 <sup>8</sup> , s <sup>−1</sup> ] <sup>b</sup> | $k_{\text{nr}}$ [10 <sup>8</sup> , s <sup>−1</sup> ] <sup>c</sup> |
|------------|-------------------------------|--------------------------|------------------------------------------------------------------|-------------------------------------------------------------------|
| <b>1a</b>  | 0.99                          | 3.63                     | 2.73                                                             | 0.02                                                              |
| <b>1b</b>  | 0.90                          | 2.88                     | 3.12                                                             | 0.35                                                              |
| <b>1c</b>  | 0.57                          | 1.85                     | 3.08                                                             | 2.32                                                              |
| <b>2a</b>  | 0.35                          | 2.57                     | 1.36                                                             | 2.53                                                              |
| <b>2bA</b> | 0.78                          | 3.45                     | 2.26                                                             | 0.64                                                              |
| <b>2bB</b> | 0.26                          | 3.43                     | 0.76                                                             | 2.16                                                              |
| <b>2c</b>  | 0.88                          | 3.25                     | 2.71                                                             | 0.37                                                              |

<sup>a</sup>  $\lambda_{\text{ex}}$  = 330 nm. <sup>b</sup> Radiative rate constant:  $k_{\text{f}} = \Phi_{\text{PL}} / \tau_{\text{PL}}$ . <sup>c</sup> Non-radiative rate constant:  $k_{\text{nr}} = (1 - \Phi_{\text{PL}}) / \tau_{\text{PL}}$ .

### 5.3. UV-vis and PL spectra of 1a in various solution: Solvent effect of photophysical property for 1a

(a) Hexane

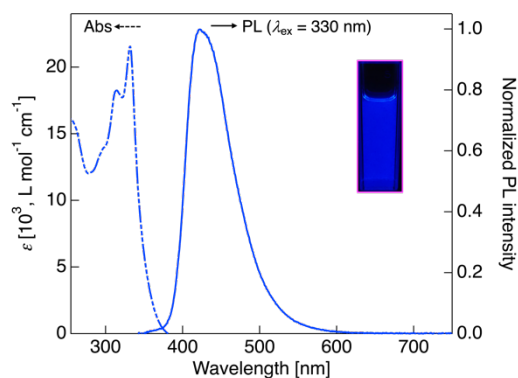

(b) CHCl<sub>3</sub>

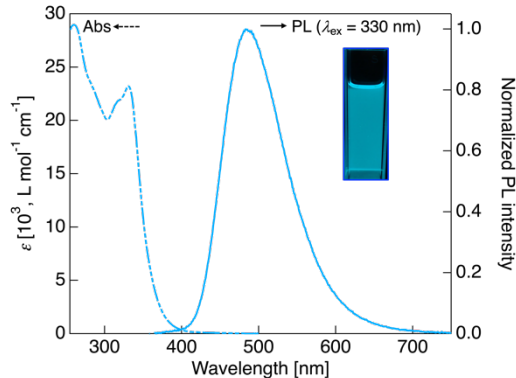

(c) EtOAc

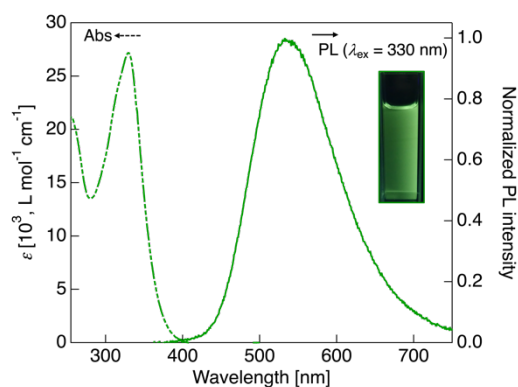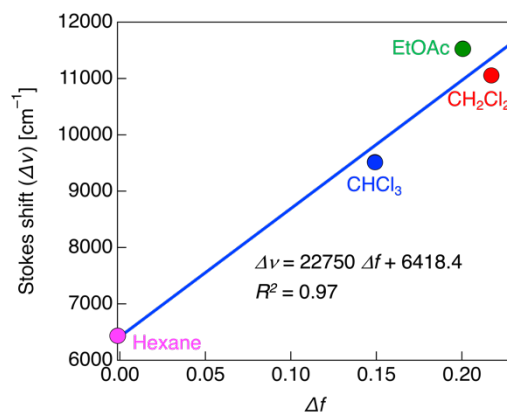

**Figure S34.** Photophysical properties of **1a** in various solvents: (a) hexane, (b) CHCl<sub>3</sub>, and (c) EtOAc; (d) Lippert-Mataga plot obtained in the solvent effect for photophysical behavior.

**Table S19.** Photophysical data of **1a** in various solvents.

| <b>1a</b> ( $y=6418.4+22750x$ ) ( $a=6.48\text{\AA}$ ) 6.33D |                   |                  |            |                                        |                                       |                                  |
|--------------------------------------------------------------|-------------------|------------------|------------|----------------------------------------|---------------------------------------|----------------------------------|
|                                                              | Dielectric const. | Refractive index | $\Delta f$ | $\nu_{\text{abs}}$ (cm <sup>-1</sup> ) | $\nu_{\text{PL}}$ (cm <sup>-1</sup> ) | $\Delta \nu$ (cm <sup>-1</sup> ) |
| Hexane                                                       | 1.8799            | 1.3749           | -0.0013777 | 30120                                  | 23683                                 | 6437                             |
| CHCl <sub>3</sub>                                            | 4.806             | 1.4429           | 0.14912754 | 30211                                  | 20695                                 | 9516                             |
| AcOEt                                                        | 6.02              | 1.37             | 0.20050637 | 30303                                  | 18773                                 | 11530                            |
| CH <sub>2</sub> Cl <sub>2</sub>                              | 8.93              | 1.424            | 0.2171701  | 30211                                  | 19157                                 | 11054                            |

#### 5.4. Excitation and PL spectra of 1a–c and 2a–c in crystalline state

(a) 1a

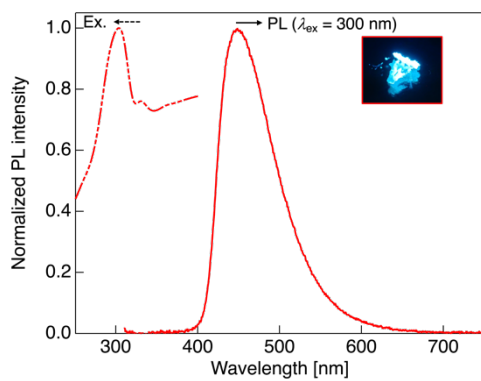

(b) 1b

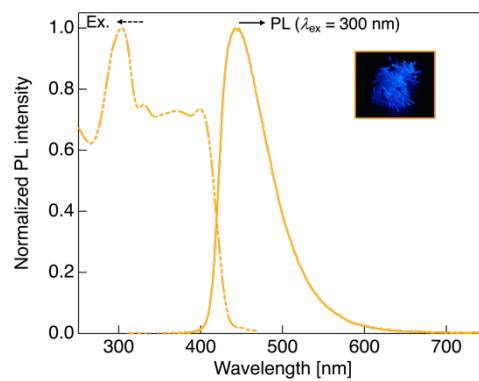

(c) 1c

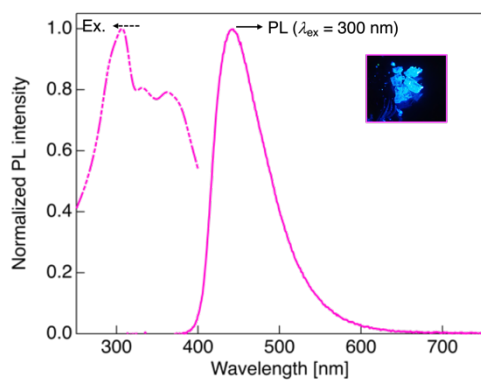

(d) 2a

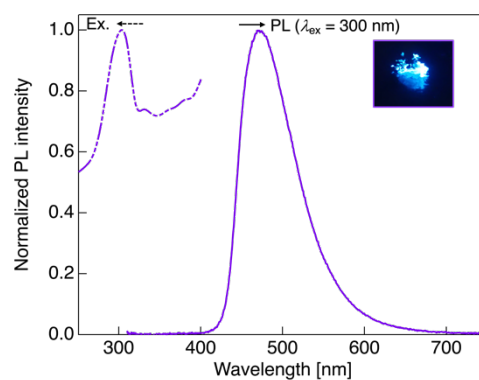

(e) 2bA

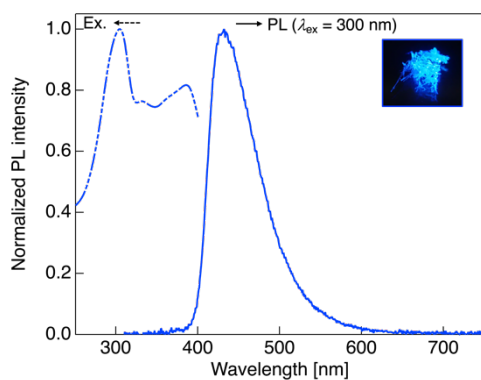

(f) 2bB

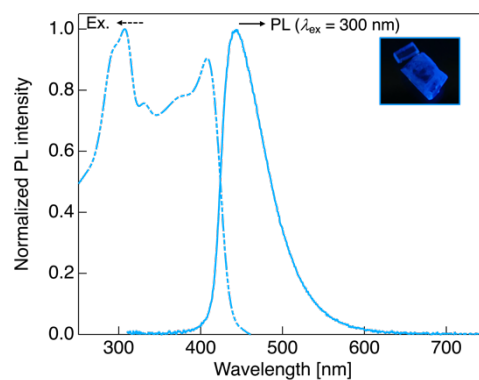

(g) 2c

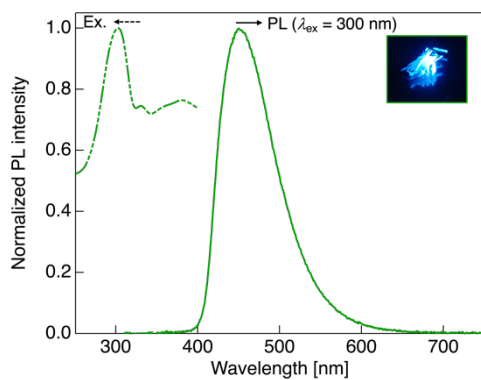

**Figure S35.** Excitation and PL spectra of **1a–c** and **2a–c** in crystalline state.

## 5.5. Fluorescence decay profiles of 1a–c and 2a–c in crystalline state

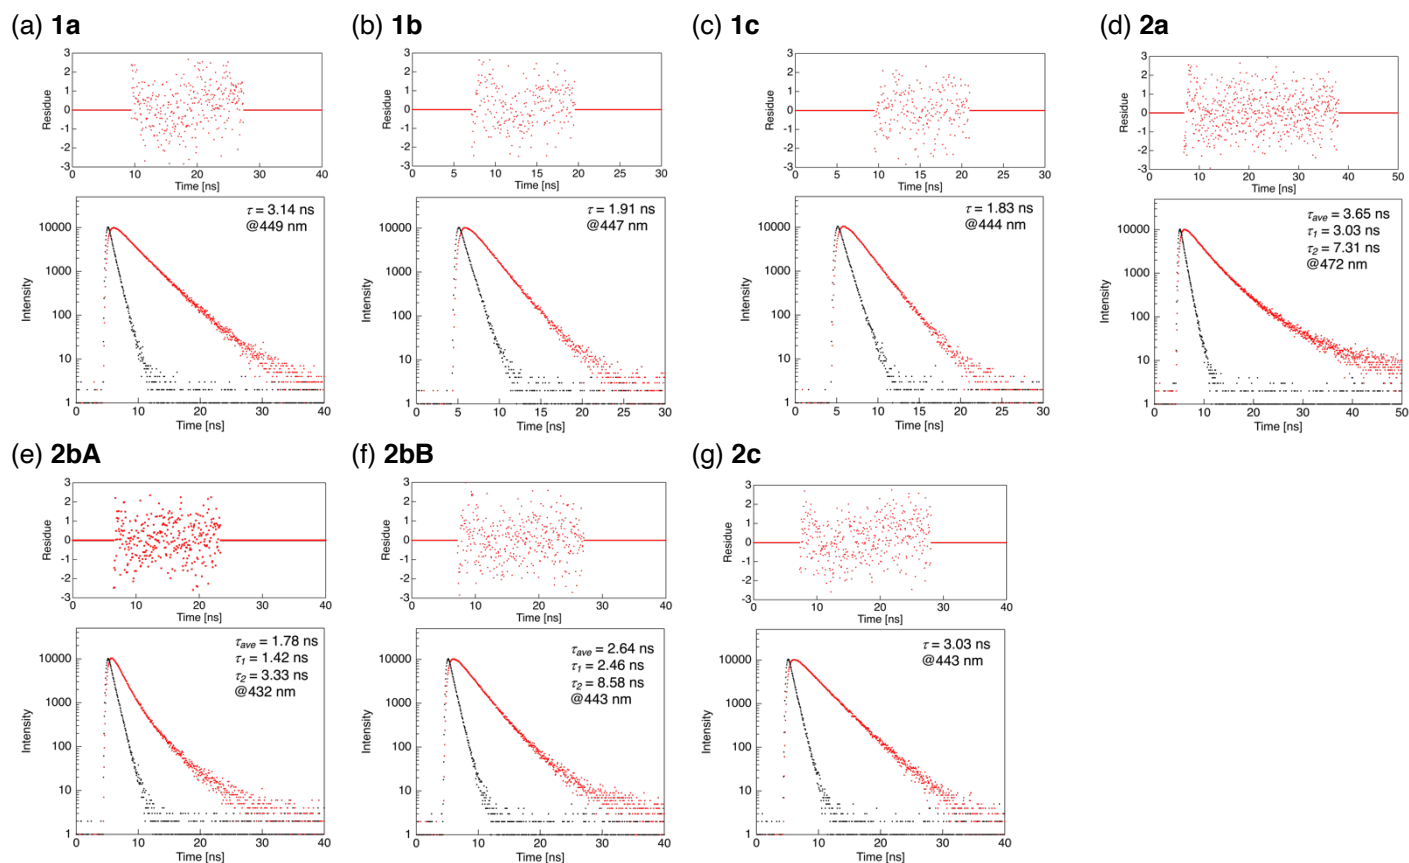

**Figure S36.** PL lifetime measurement of **1a–c** and **2a–c** in crystal using a Quantaurus-Tau fluorescence lifetime spectrometer (C11367-34).

**Table S20.** Average fluorescence lifetime, radiative and non-radiative rate constant in crystal

| Molecule   | $\Phi_{\text{PL}}^{\text{a}}$ | $\tau_{\text{ave}}$ [ns] | $k_{\text{f}}$ [ $10^8, \text{s}^{-1}$ ] <sup>b</sup> | $k_{\text{nr}}$ [ $10^8, \text{s}^{-1}$ ] <sup>c</sup> |
|------------|-------------------------------|--------------------------|-------------------------------------------------------|--------------------------------------------------------|
| <b>1a</b>  | 0.98                          | 3.14                     | 3.12                                                  | 0.06                                                   |
| <b>1b</b>  | 1.0                           | 1.91                     | 5.24                                                  | 0.00                                                   |
| <b>1c</b>  | 1.0                           | 1.83                     | 5.46                                                  | 0.00                                                   |
| <b>2a</b>  | 1.0                           | 3.65                     | 2.74                                                  | 0.00                                                   |
| <b>2bA</b> | 0.52                          | 1.78                     | 2.92                                                  | 2.70                                                   |
| <b>2bB</b> | 0.99                          | 2.64                     | 3.75                                                  | 0.04                                                   |
| <b>2c</b>  | 1.0                           | 3.03                     | 3.30                                                  | 0.00                                                   |

<sup>a</sup>  $\lambda_{\text{ex}} = 330 \text{ nm}$ . <sup>b</sup> Radiative rate constant:  $k_{\text{f}} = \Phi_{\text{PL}}/\tau_{\text{PL}}$ . <sup>c</sup> Non-radiative rate constant:  $k_{\text{nr}} = (1-\Phi_{\text{PL}})/\tau_{\text{PL}}$ .
